# Control acute agitation with **GEODON**<sup>®</sup> for *Injection* (ziprasidone mesylate)

*In schizophrenia. . .*

## Rapid control\* with low EPS<sup>1-4</sup>

- Low incidence of movement disorders<sup>1-4</sup>
- Smooth transition, with continued improvement, from IM to oral therapy<sup>3,4</sup>
- May be used concomitantly with benzodiazepines<sup>2,3,5</sup>

\* In 2 pivotal studies vs control, significance was achieved at the 2-hour primary end point (10 mg study) and at the 4-hour primary end point (20 mg study).

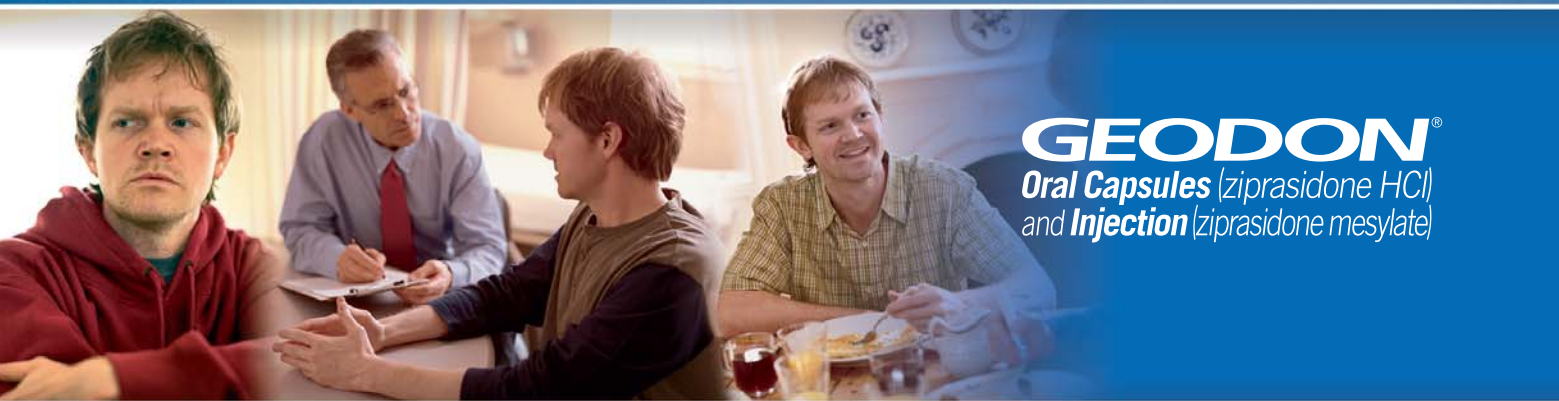

**GEODON**<sup>®</sup>  
*Oral Capsules* (ziprasidone HCl)  
and *Injection* (ziprasidone mesylate)

GEODON for Injection is indicated for the treatment of acute agitation in schizophrenic patients for whom treatment with GEODON is appropriate and who need intramuscular antipsychotic medication for rapid control of the agitation.

**Elderly patients with dementia-related psychosis treated with atypical antipsychotic drugs are at an increased risk of death compared to placebo. GEODON is not approved for the treatment of patients with dementia-related psychosis.**

**GEODON is contraindicated in patients with a known history of QT prolongation, recent acute myocardial infarction, or uncompensated heart failure, and should not be used with other QT-prolonging drugs. GEODON has a greater capacity to prolong the QT<sub>c</sub> interval than several antipsychotics. In some drugs, QT prolongation has been associated with torsade de pointes, a potentially fatal arrhythmia. In many cases this would lead to the conclusion that other drugs should be tried first.**

As with all antipsychotic medications, a rare and potentially fatal condition known as neuroleptic malignant syndrome (NMS) has been reported with GEODON. NMS can cause hyperpyrexia, muscle rigidity, diaphoresis, tachycardia, irregular pulse or blood pressure, cardiac dysrhythmia, and altered mental status. If signs and symptoms appear, immediate discontinuation, treatment, and monitoring are recommended.

Prescribing should be consistent with the need to minimize tardive dyskinesia (TD), a potentially irreversible dose- and duration-dependent syndrome. If signs and symptoms appear, discontinuation should be considered since TD may remit partially or completely.

Hyperglycemia-related adverse events, sometimes serious, have been reported in patients treated with atypical antipsychotics. There have been few reports of hyperglycemia or diabetes in patients treated with GEODON, and it is not known if GEODON is associated with these events. Patients treated with an atypical antipsychotic should be monitored for symptoms of hyperglycemia.

Precautions include the risk of rash, orthostatic hypotension, and seizures.

In fixed-dose, pivotal studies, the most commonly observed adverse events associated with the use of GEODON for Injection (incidence  $\geq 5\%$ ) and observed at a rate in the higher GEODON dose groups (10 mg, 20 mg) of at least twice that of the lowest GEODON dose group (2 mg control) were somnolence (20%), headache (13%), and nausea (12%).

*Please see brief summary of prescribing information on adjacent page.*



# *We can't wait.*

*Because I don't want to lose  
my son to the voices again.*

The voices in his head are back.  
I can't bear to see him like this.

He was doing so well on his own.  
This will ruin everything.  
It could send him back to the hospital.

We're fighting to get  
things back under control.  
But we need help now.

**ZYPREXA**<sup>®</sup>  
Olanzapine

For resources to help you help your patients with  
schizophrenia, visit [www.ToolsForTheFight.com](http://www.ToolsForTheFight.com)



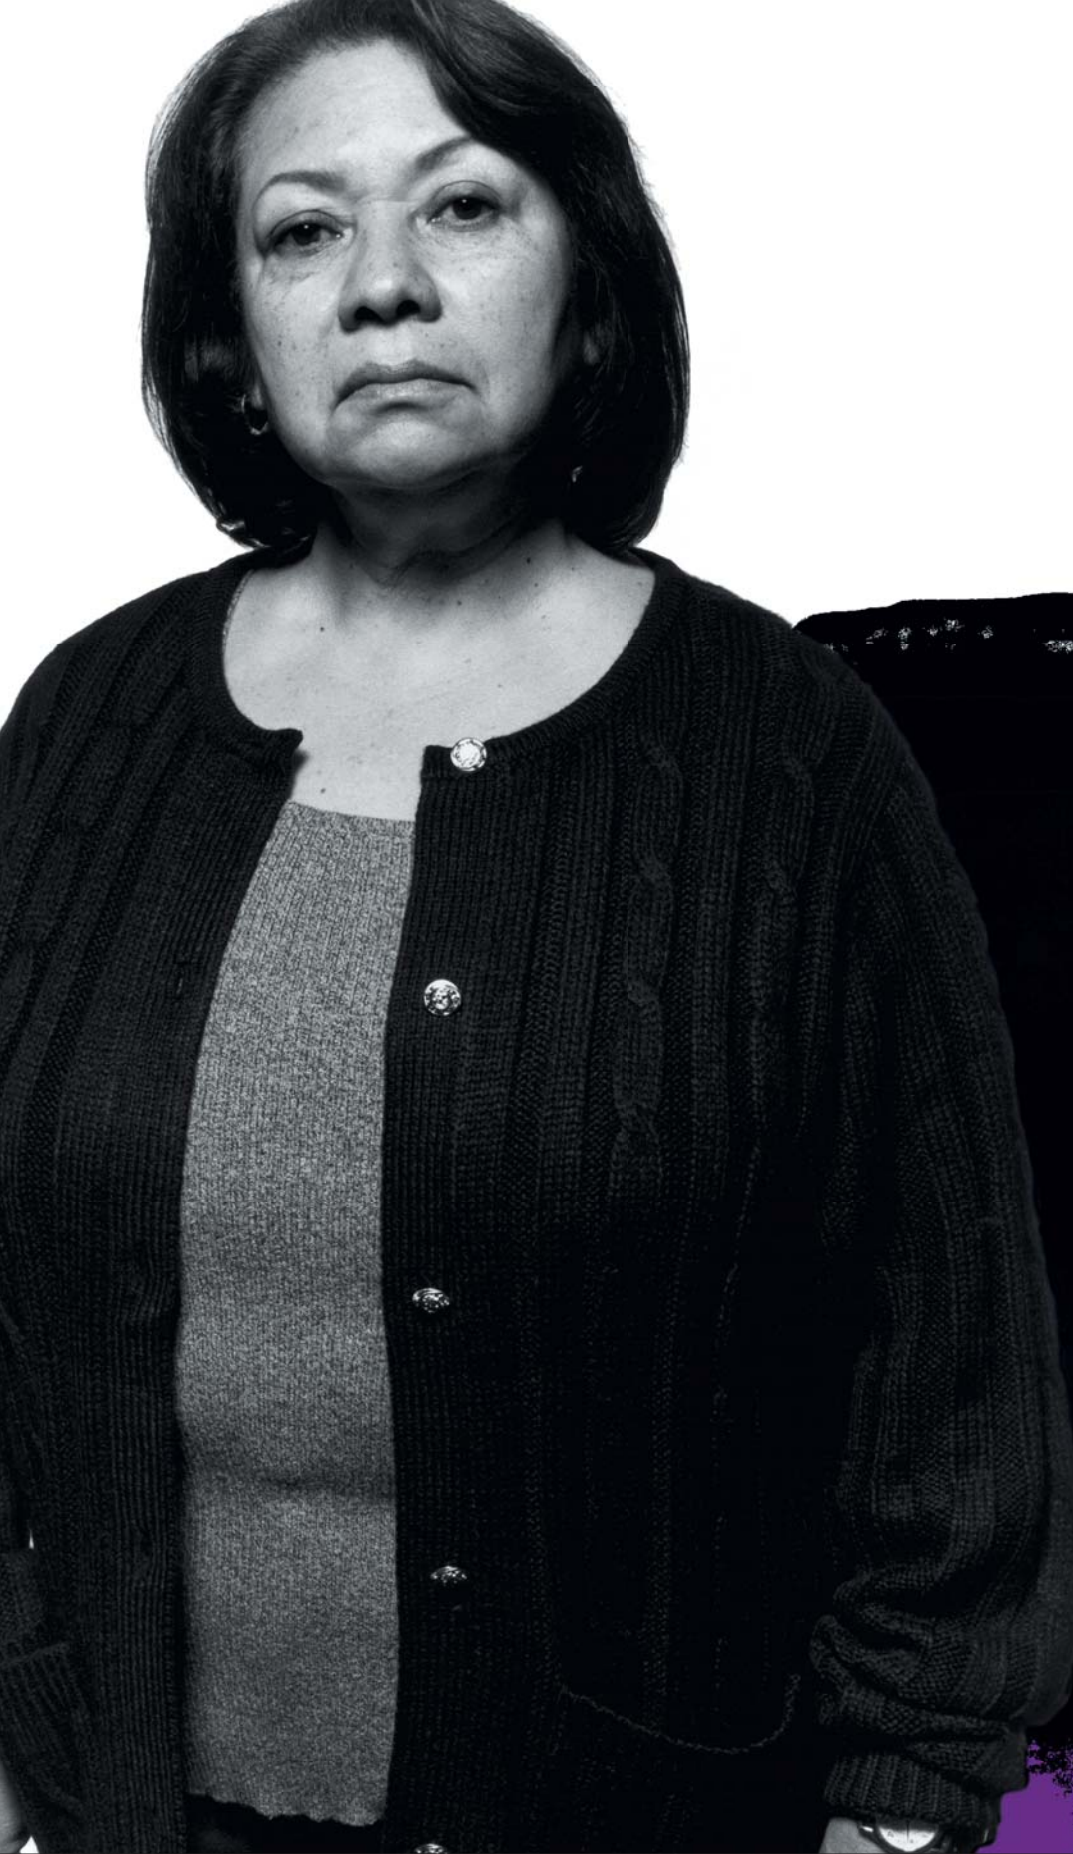

The labeling for ZYPREXA includes a boxed warning:

- Elderly patients with dementia-related psychosis treated with atypical antipsychotic drugs are at an increased risk of death compared to placebo.
- ZYPREXA is not approved for the treatment of elderly patients with dementia-related psychosis.

ZYPREXA is approved for the treatment of schizophrenia, acute bipolar mania, and for maintenance treatment in bipolar disorder.

For Important Safety Information, including boxed warning, see adjacent page and accompanying Brief Summary of Prescribing Information.

*Lilly*

## Important Safety Information for ZYPREXA® (Olanzapine)

### Increased Mortality in Elderly Patients with Dementia-Related Psychosis

**Elderly patients with dementia-related psychosis treated with atypical antipsychotic drugs are at an increased risk of death compared to placebo. Analyses of seventeen placebo-controlled trials (modal duration of 10 weeks) in these patients revealed a risk of death in the drug-treated patients of between 1.6 to 1.7 times that seen in placebo-treated patients. Over the course of a typical 10-week controlled trial, the rate of death in drug-treated patients was about 4.5%, compared to a rate of about 2.6% in the placebo group. Although the causes of death were varied, most of the deaths appeared to be either cardiovascular (eg, heart failure, sudden death) or infectious (eg, pneumonia) in nature. ZYPREXA is not approved for the treatment of elderly patients with dementia-related psychosis.**

**Cerebrovascular adverse events (CVAE), including stroke, in elderly patients with dementia**—Cerebrovascular adverse events (eg, stroke, transient ischemic attack), including fatalities, were reported in patients in trials of ZYPREXA in elderly patients with dementia-related psychosis. In placebo-controlled trials, there was a significantly higher incidence of CVAE in patients treated with ZYPREXA compared to patients treated with placebo. ZYPREXA is not approved for the treatment of patients with dementia-related psychosis.

**Hyperglycemia and diabetes mellitus**—Hyperglycemia, in some cases associated with ketoacidosis, coma, or death, has been reported in patients treated with atypical antipsychotics including ZYPREXA. All patients taking atypicals should be monitored for symptoms of hyperglycemia. Persons with diabetes who are started on atypicals should be monitored regularly for worsening of glucose control; those with risk factors for diabetes should undergo baseline and periodic fasting blood glucose testing. Patients who develop symptoms of hyperglycemia during treatment should undergo fasting blood glucose testing.

**Neuroleptic malignant syndrome (NMS)**—As with all antipsychotic medications, a rare and potentially fatal condition known as NMS has been reported with olanzapine. If signs and symptoms appear, immediate discontinuation is recommended. Clinical manifestations of NMS are hyperpyrexia, muscle rigidity, altered mental status and evidence of autonomic instability (irregular pulse or blood pressure, tachycardia, diaphoresis and cardiac dysrhythmia). Additional signs may include elevated creatinine phosphokinase, myoglobinuria (rhabdomyolysis), and acute renal failure.

**Tardive dyskinesia (TD)**—As with all antipsychotic medications, prescribing should be consistent with the need to minimize the risk of TD. The risk of developing TD and the likelihood that it will become irreversible are believed to increase as the duration of treatment and the total cumulative dose of antipsychotic increase. The syndrome may remit, partially or completely, if antipsychotic treatment is withdrawn.

**Medication dispensing and prescribing errors** have occurred between ZYPREXA® (olanzapine) and Zyrtec® (cetirizine HCl). These errors could result in unnecessary adverse events or potential relapse in patients suffering from schizophrenia or bipolar disorder. To reduce the potential for dispensing errors, please write ZYPREXA clearly.

**The most common treatment-emergent adverse event** associated with ZYPREXA (vs placebo) in 6-week acute-phase schizophrenia trials was somnolence (26% vs 15%). Other common events were dizziness (11% vs 4%), weight gain (6% vs 1%), personality disorder (COSTART term for nonaggressive objectionable behavior; 8% vs 4%), constipation (9% vs 3%), akathisia (5% vs 1%), and postural hypotension (5% vs 2%).

**The most common treatment-emergent adverse event** associated with ZYPREXA (vs placebo) in 3- and 4-week bipolar mania trials was somnolence (35% vs 13%). Other common events were dry mouth (22% vs 7%), dizziness (18% vs 6%), asthenia (15% vs 6%), constipation (11% vs 5%), dyspepsia (11% vs 5%), increased appetite (6% vs 3%), and tremor (6% vs 3%).

**For complete safety profile, see the full Prescribing Information.**

ZYPREXA is a registered trademark of Eli Lilly and Company. Zyrtec is a registered trademark of UCB, SA.





# Early Career Child Mental Health Research Training

## Child Intervention, Prevention, and Mental Health Services Research (CHIPS)

**Program:** CHIPS is a weeklong summer research training program funded by the National Institute of Mental Health to help fellows obtain external funding and increase academic success.

**Candidates:** Early career scientists—including postdoctoral fellows, child psychiatry residents, and junior faculty—interested in research careers in child mental health intervention, prevention, and the provision of services.

### Benefits of Program:

- Be paired with an expert CHIPS mentor to help gain external funding.
- Receive full funding for a trip to visit your CHIPS mentor and attend a national conference during the year of fellowship.
- Participate in an intensive weeklong training institute led by nationally renowned researchers.

**chips** { Child Intervention,  
Prevention,  
and Services

Applications and additional information are available at [www.chipsfellows.com](http://www.chipsfellows.com) or by contacting Sarah Mendak at [mendaksm@upmc.edu](mailto:mendaksm@upmc.edu) or 412-383-5478.

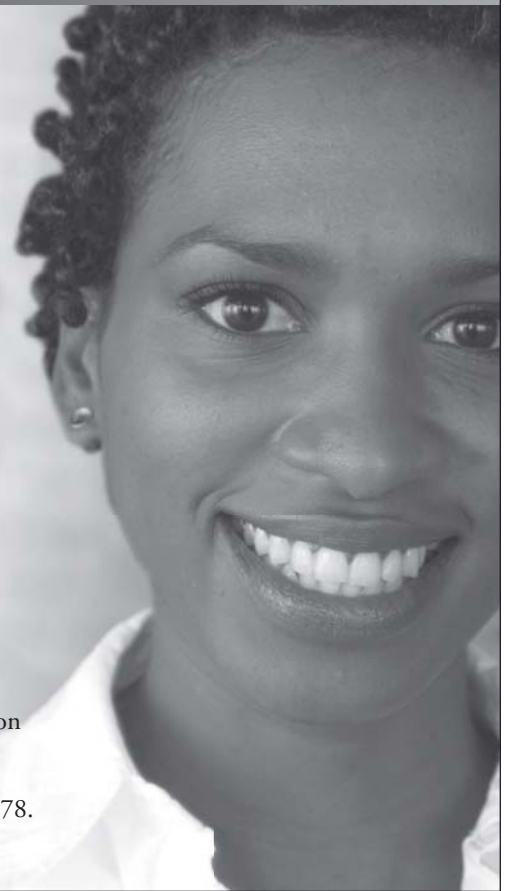

## ARE YOU OUT OF THE LOOP?

## UNLOCK YOUR CONNECTIONS...

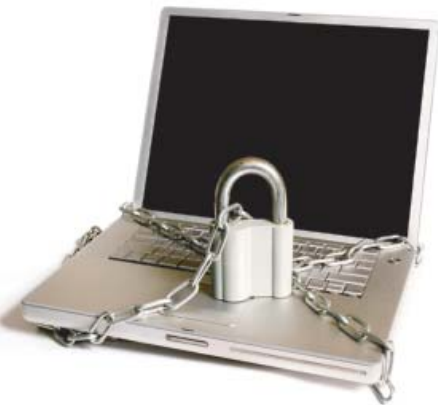

Update your  
APA Online Membership Profile  
at [www.psych.org](http://www.psych.org)

## Psych Oral Board Tutorials

### Now, 3-day practice orals course limited to 20 students

- ◆ Opening sessions will teach oral exam skills
- ◆ Fees include doing two practice oral exams
- ◆ One live-patient and one video taped interview
- ◆ Each exam is 1¼ hours – time enough for hour interview and exam as well as faculty evaluation
- ◆ Senior faculty include former board examiners
- ◆ Weekend 4 to 10 weeks before your oral boards

**February 15-18, 2008 – Tampa**  
**Summer 2008 – Chicago**

- ◆ In board exam city just before your oral boards
- January 14-17 – Portland, OR**  
**May 7-10, 2008 – Chicago**

- ◆ You may buy extra private and public practice exams based on patient interview or videotape

[www.psychtutor.net/m7za](http://www.psychtutor.net/m7za) 800-285-3283

**When you positively must pass**



# Are your patients' restless legs to

**Restless Legs Syndrome (RLS) is a common, underdiagnosed condition affecting a range of patients<sup>1,2</sup>**

- Approximately 12 million Americans suffer from moderate to severe primary RLS<sup>1,3,4</sup>
- A differential diagnosis can help rule out other health conditions that can cause problems with sleeping, including insomnia/sleep disorders, depression, or RLS<sup>1</sup>

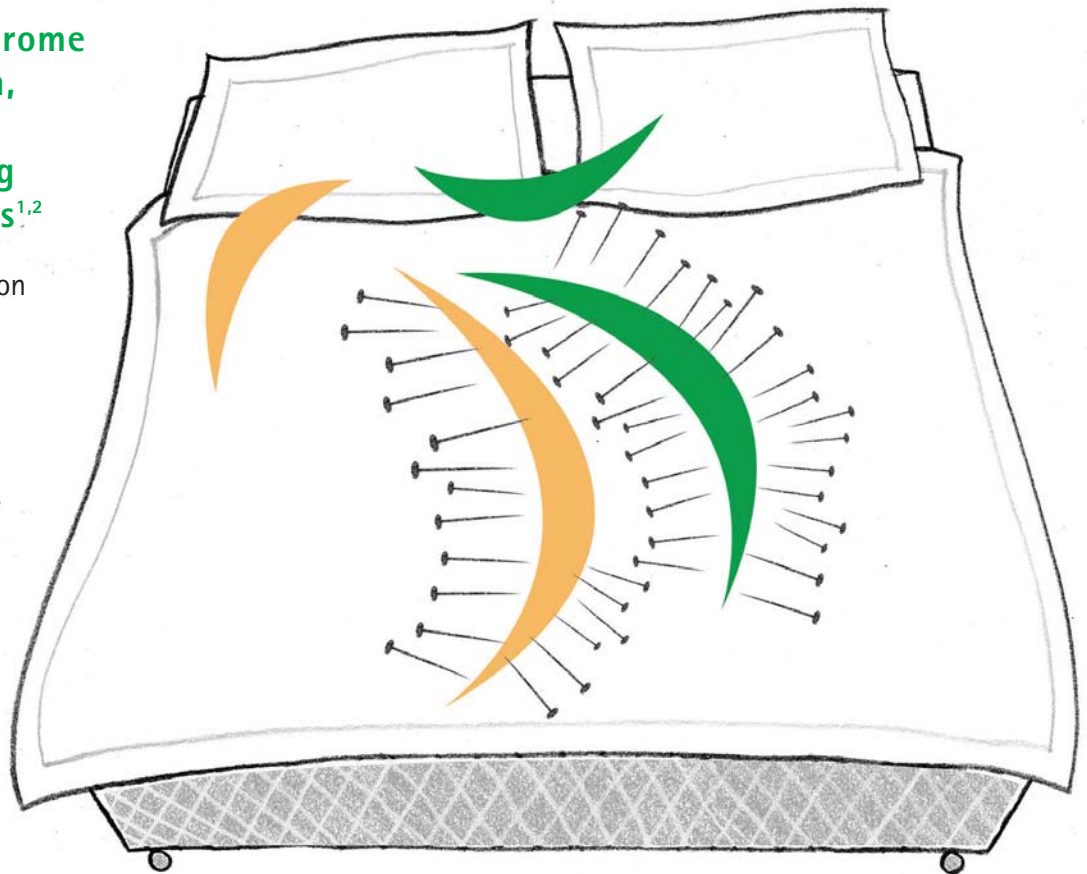

**These essential criteria can help confirm RLS<sup>5,6</sup>**

- 1 Urge to move legs—usually accompanied by uncomfortable leg sensations
- 2 Symptoms begin or worsen during rest such as when lying or sitting
- 3 Symptoms are partially or totally relieved by movement
- 4 Symptoms are worse in the evening or night

**The only FDA-approved medications for the treatment of RLS are within the dopamine agonist (DA) class**

# blame for their sleepless nights?

## Restless Legs Syndrome...Simplified

MIRAPEX offers effective, long-term relief from the symptoms of moderate to severe primary RLS<sup>7</sup>

- Well-established safety and tolerability profile
- No predicted P450 interactions
- Not a controlled substance
- Convenient dosing and titration
  - 75% of patients on the 0.25 mg dose of MIRAPEX responded to therapy\*
  - MIRAPEX Starter Kit offers simple single-step titration<sup>†</sup>

**IMPORTANT SAFETY INFORMATION ABOUT MIRAPEX: Patients have reported falling asleep without perceived warning signs during activities of daily living, including operation of a motor vehicle.** Hallucinations and postural (orthostatic) hypotension may occur. The most commonly reported adverse events in RLS clinical trials for MIRAPEX vs placebo were nausea (16% vs 5%), headache (16% vs 15%), fatigue (9% vs 7%), and somnolence (6% vs 3%).

Patients and caregivers should be informed that impulse control disorders/compulsive behaviors may occur while taking medicines, including pramipexole, to treat Parkinson's disease and RLS.

Please see accompanying Brief Summary of Prescribing Information.

\* Results of a 12-week, placebo-controlled, randomized, double-blind, fixed-dose-treatment trial to assess the efficacy and safety of MIRAPEX vs placebo in the treatment of moderate to severe primary RLS.

Responders defined as patients with symptoms rated as "much improved" or "very much improved," as measured on the CGI-I.

<sup>†</sup>Provides samples of the first 2 dosage strengths. Additional titration steps may be needed to achieve symptom relief.

**References:** 1. Hening W, Walters AS, Allen RP, et al. Impact, diagnosis and treatment of restless legs syndrome (RLS) in a primary care population: the REST (RLS epidemiology, symptoms, and treatment) primary care study. *Sleep Med.* 2004;5:237-246. 2. Allen RP, Earley CJ. Restless legs syndrome: a review of clinical and pathophysiologic features. *J Clin Neurophysiol.* 2001;18:128-147. 3. National Heart, Lung, and Blood Institute Working Group on Restless Legs Syndrome. Restless legs syndrome: detection and management in primary care. *Am Fam Physician.* 2000;62:108-114. 4. US Census Bureau. Table 1: Population Age 18 or Over: July 1, 2003. <http://www.census.gov/PressRelease/www/releases/CB04-38TABLE1.pdf>. Accessed April 12, 2005. 5. Allen RP, Picchietti D, Hening WA, et al. Restless legs syndrome: diagnostic criteria, special considerations, and epidemiology. A report from the restless legs syndrome diagnosis and epidemiology workshop at the National Institutes of Health. *Sleep Med.* 2003;4:101-119. 6. National Institute of Neurological Disorders and Stroke. Restless legs syndrome fact sheet. [http://www.ninds.nih.gov/disorders/restless\\_legs/detail\\_restless\\_legs.htm](http://www.ninds.nih.gov/disorders/restless_legs/detail_restless_legs.htm). Accessed May 26, 2006. 7. Trenkwalder C, Stiasny-Kolster K, Kupsch A, et al. Controlled withdrawal of pramipexole after 6 months of open-label treatment in patients with restless legs syndrome. *Mov Disord.* 2006;21:1404-1410.

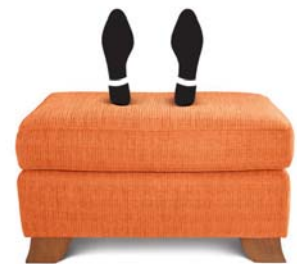

**Mirapex**<sup>®</sup>  
pramipexole dihydrochloride tablets

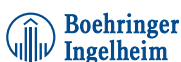





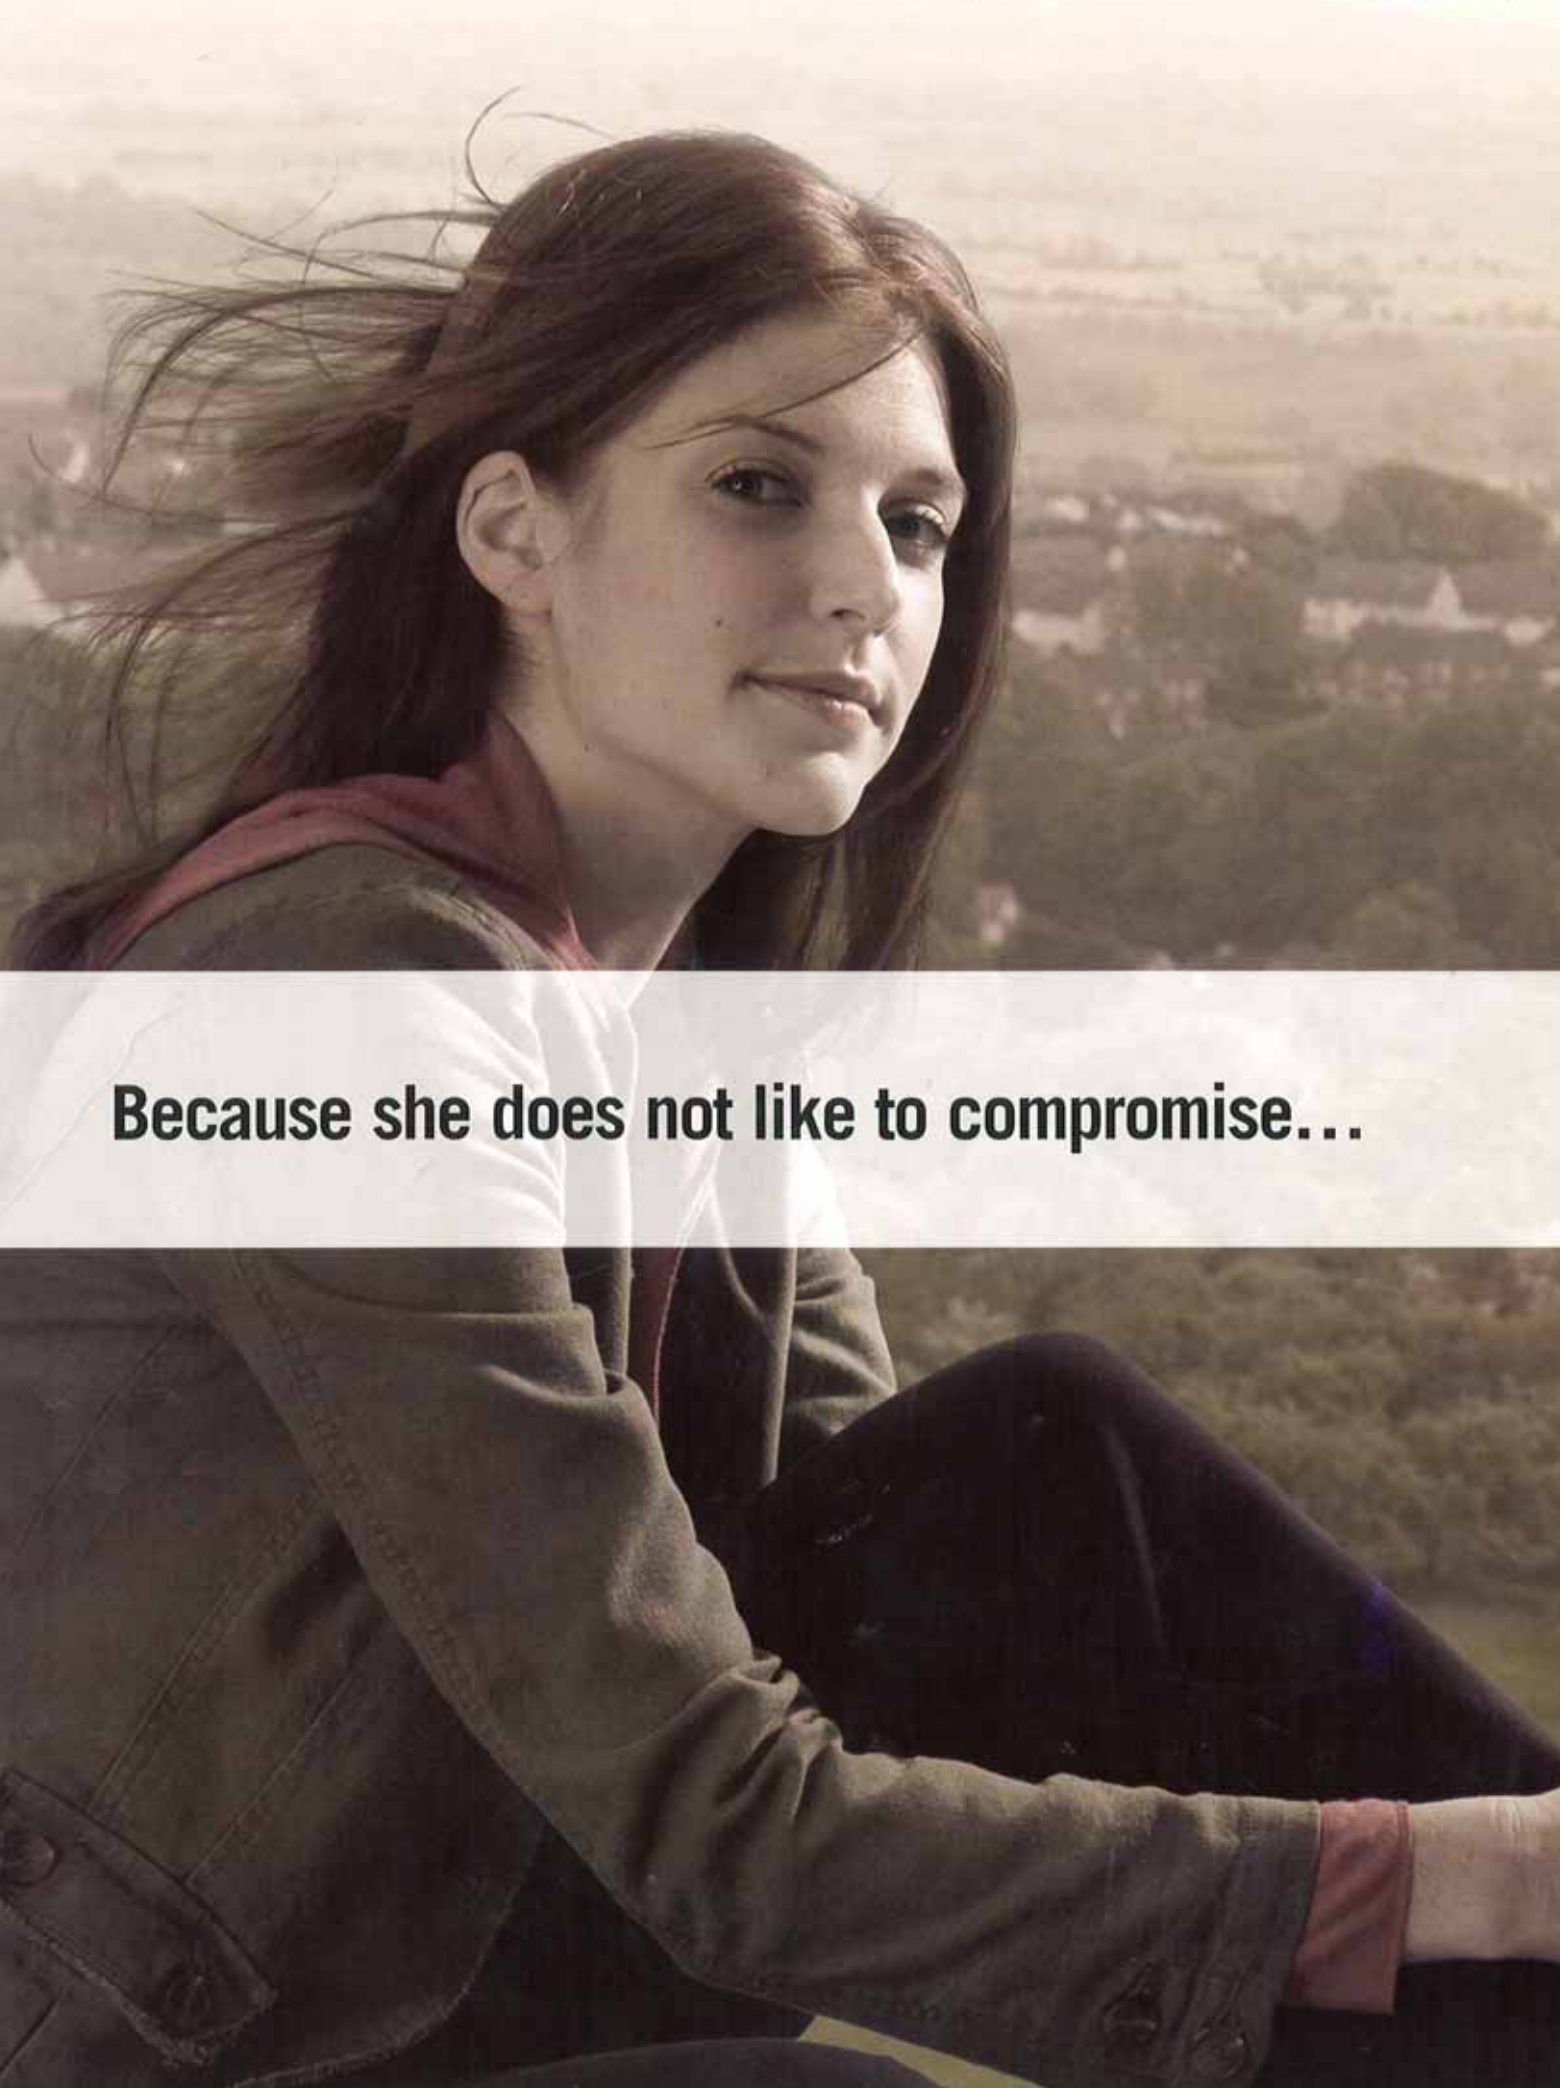

**Because she does not like to compromise...**

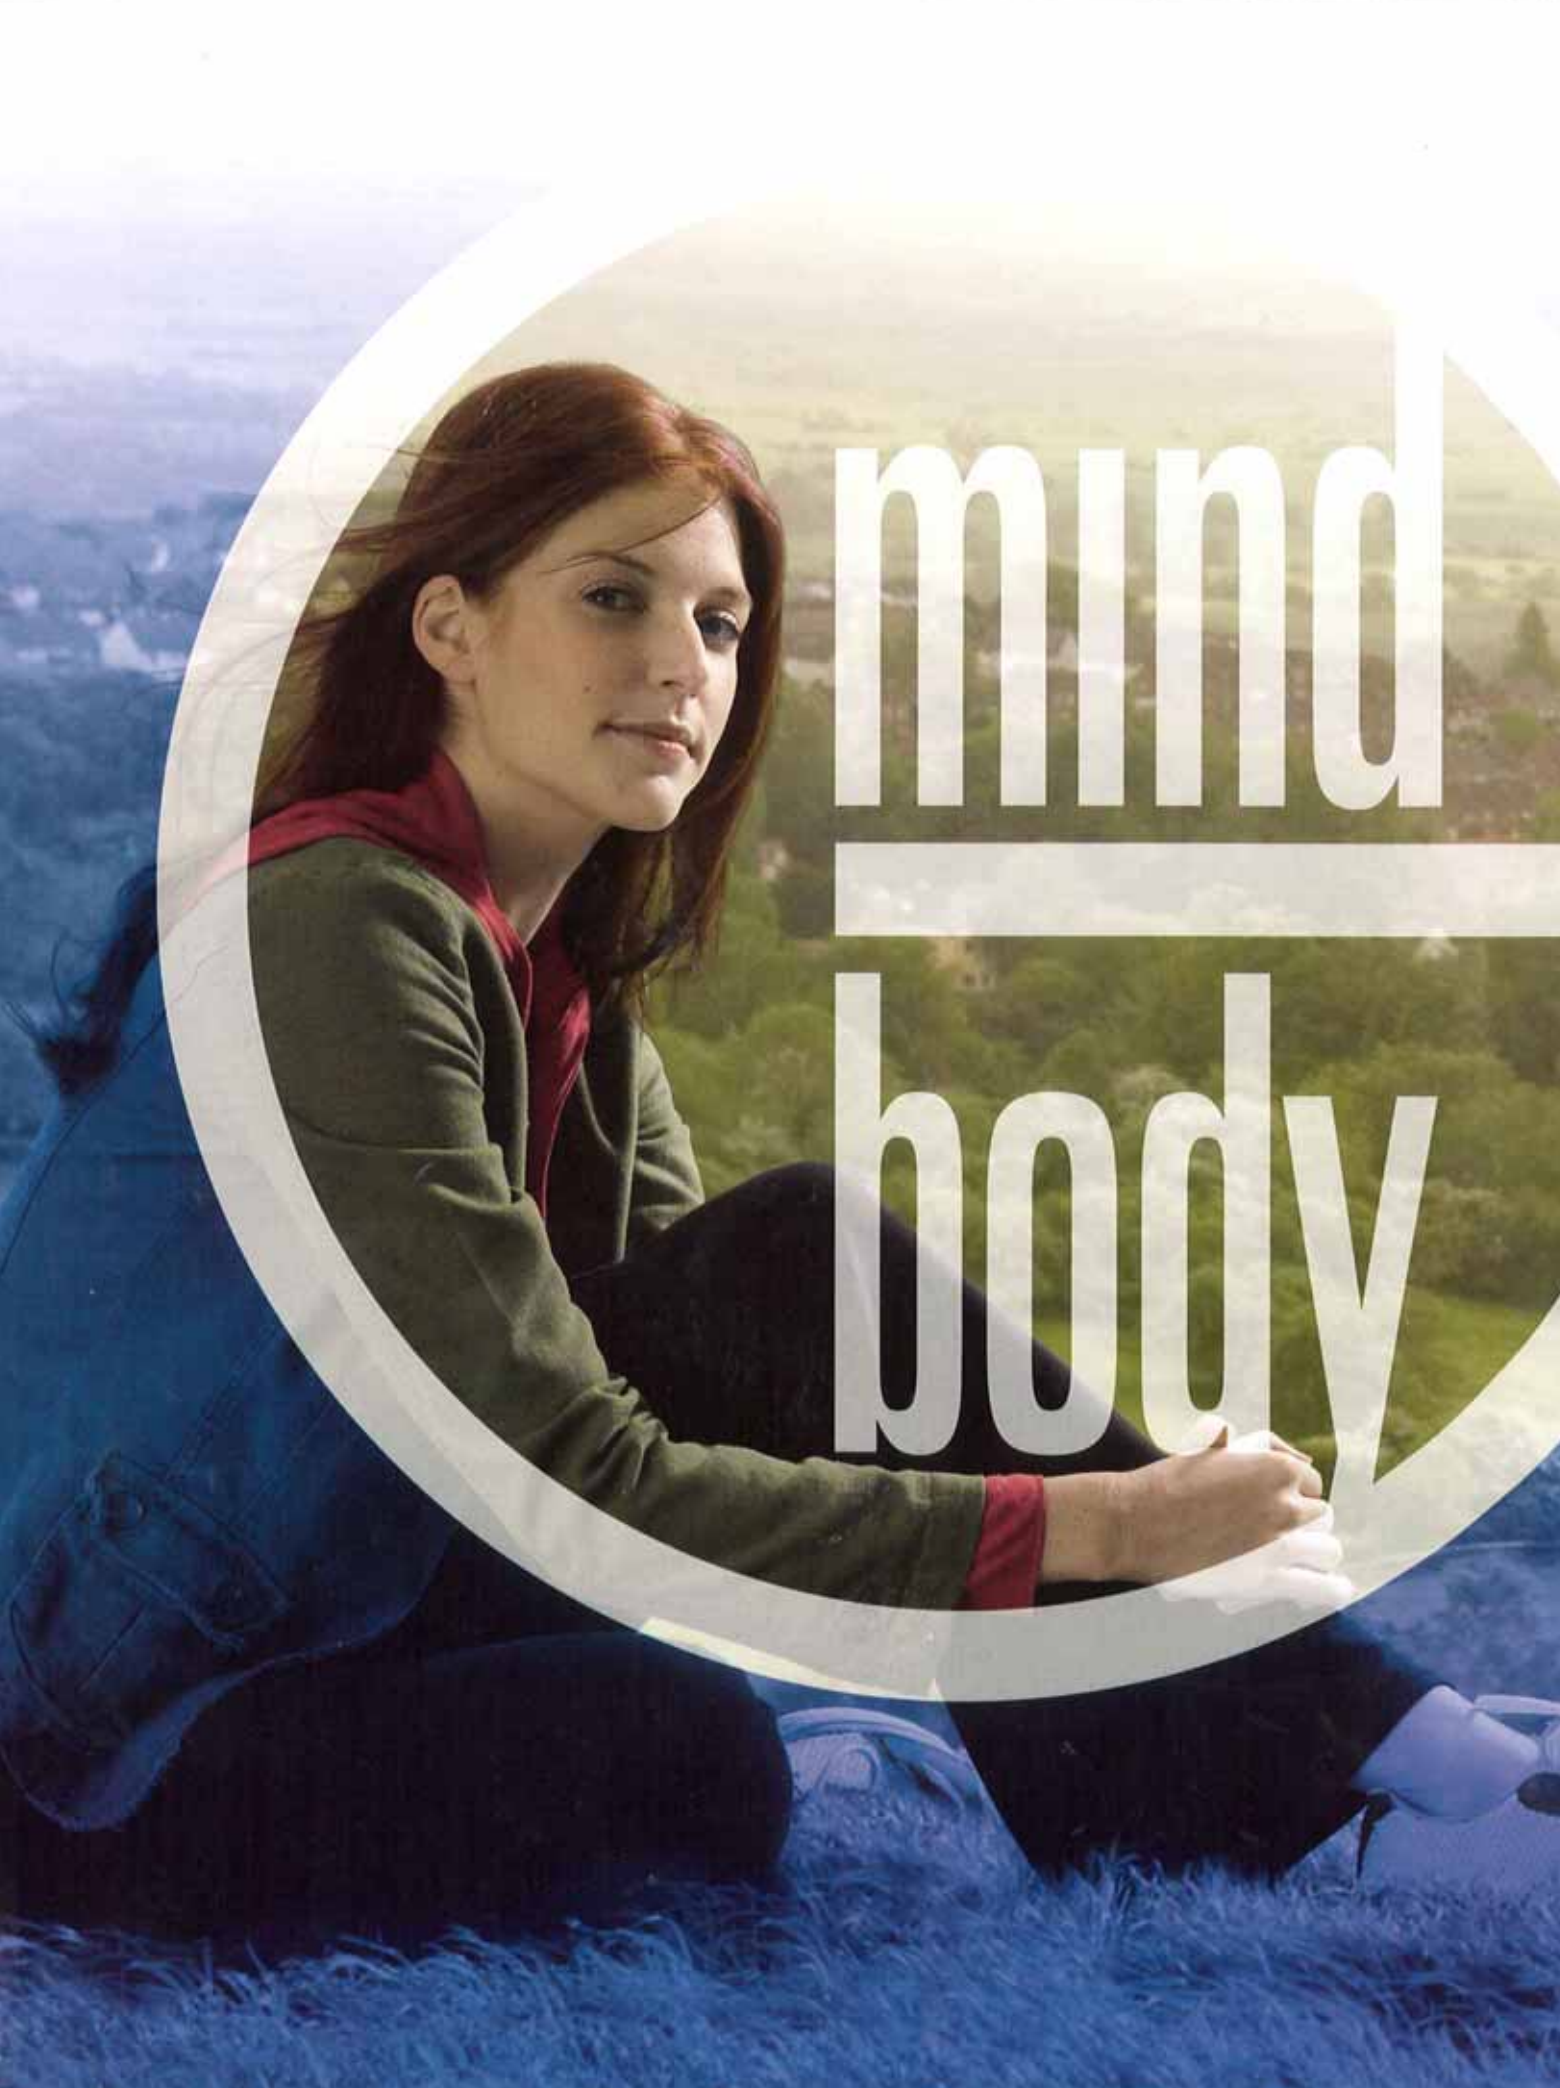

mind

body

IN SCHIZOPHRENIA

# Treat With the Body in Mind

CHOOSE COMPARABLE POWER...

Consistent results in acute head-to-head studies<sup>1,2</sup>

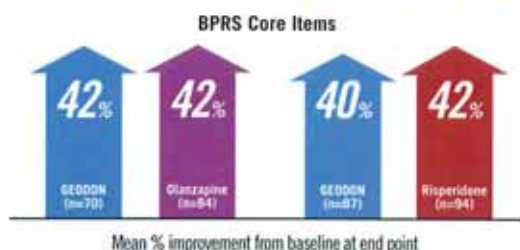

A 6-week, double-blind, randomized study of GEODON vs olanzapine and an 8-week, double-blind, randomized study of GEODON vs risperidone.

- BPRS core items include hallucinatory behavior, unusual thought content, conceptual disorganization, and suspiciousness
- Comparable efficacy was maintained in double-blind extension studies
  - up to 1 year vs risperidone<sup>1</sup>
  - up to 6 months vs olanzapine<sup>2</sup>

...WITHOUT COMPROMISING METABOLIC PARAMETERS

Significant results in switch studies after 1 year<sup>1,2</sup>

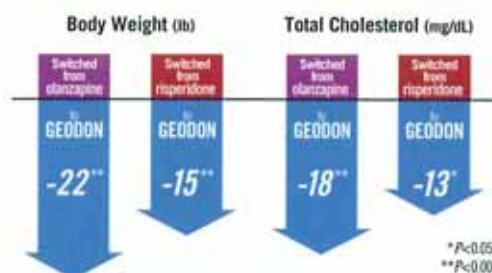

Two 1-year open-label extensions of 6-week, open-label switch studies in patients suboptimally controlled due to partial response or poor tolerability.

- Patients switching to GEODON from olanzapine and risperidone also experienced reductions in triglycerides<sup>3</sup>
- In the acute head-to-head studies...
- In the GEODON vs olanzapine study, olanzapine significantly increased body weight (8 lb vs 2 lb for GEODON,  $P<0.0001$ )<sup>1,2</sup>
  - In the GEODON vs risperidone study, risperidone increased body weight (2 lb vs 0 lb for GEODON,  $P<0.01$ )<sup>1,3</sup>

CHOOSE

**GEODON**<sup>®</sup>  
(ziprasidone HCl) Oral Capsules

GEODON is indicated for the treatment of acute manic or mixed episodes associated with bipolar disorder and for the treatment of schizophrenia.

Elderly patients with dementia-related psychosis treated with atypical antipsychotic drugs are at an increased risk of death compared to placebo. GEODON is not approved for the treatment of patients with dementia-related psychosis.

GEODON is contraindicated in patients with a known history of QT prolongation, recent acute myocardial infarction, or uncompensated heart failure, and should not be used with other QT-prolonging drugs. GEODON has a greater capacity to prolong the QT<sub>c</sub> interval than several antipsychotics. In some drugs, QT prolongation has been associated with torsade de pointes, a potentially fatal arrhythmia. In many cases this would lead to the conclusion that other drugs should be tried first.

As with all antipsychotic medications, a rare and potentially fatal condition known as neuroleptic malignant syndrome (NMS) has been reported with GEODON. NMS can cause hyperpyrexia, muscle rigidity, diaphoresis, tachycardia, irregular pulse or blood pressure, cardiac dysrhythmia, and altered mental status. If signs and symptoms appear, immediate discontinuation, treatment, and monitoring are recommended.

Prescribing should be consistent with the need to minimize tardive dyskinesia (TD), a potentially irreversible dose- and duration-dependent syndrome. If signs and symptoms appear, discontinuation should be considered since TD may remit partially or completely.

Hyperglycemia-related adverse events, sometimes serious, have been reported in patients treated with atypical antipsychotics. There have been few reports of hyperglycemia or diabetes in patients treated with GEODON, and it is not known if GEODON is associated with these events. Patients treated with an atypical antipsychotic should be monitored for symptoms of hyperglycemia.

Precautions include the risk of rash, orthostatic hypotension, and seizures.

The most common adverse events associated with GEODON in bipolar mania were somnolence, extrapyramidal symptoms, dizziness, akathisia, and abnormal vision.

In short-term schizophrenia trials, the most commonly observed adverse events associated with GEODON at an incidence of  $\geq 5\%$  and at least twice the rate of placebo were somnolence and respiratory tract infection.

In short-term schizophrenia clinical trials, 10% of GEODON-treated patients experienced a weight gain of  $\geq 7\%$  of body weight vs 4% for placebo.

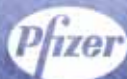

Please see brief summary of prescribing information, including boxed warning, on adjacent page.





# ZYPREXA® (olanzapine)?

Name: \_\_\_\_\_

Address: \_\_\_\_\_

Date: \_\_\_\_\_

Rx

ZYPREXA  
10 mg

You wrote “ZYPREXA.”

Will your patient leave the pharmacy with something else?

With over 4,000 drugs on the market and more than 8 million prescriptions filled every day, medication errors can and do occur. For example, ZYPREXA and Zyrtec® (cetirizine HCl) have been mistaken, one for the other, in the past.

To help avoid such medication errors, the Institute for Safe Medication Practices (ISMP) recommends that physicians:

- Print the medication’s brand name and generic name on all prescriptions.
- Include dosage form, strength, and full instructions.
- Pronounce the name for the patient or caregiver, and have them say it back to you.
- Remind the patient to check for anything unusual (eg, capsules instead of the usual tablets) before they leave the pharmacy.

**Please take special care when prescribing any medication.**

**Millions of patients and their families are counting on you.**

OL33361 PRINTED IN USA. 3000103575 ©2005, ELI LILLY AND COMPANY. ALL RIGHTS RESERVED.

ZYPREXA is a registered trademark of Eli Lilly and Company.

Zyrtec is a registered trademark of UCB, Societe Anonyme.

*Lilly*  
Answers That Matter.

The things that may describe a patient with bipolar mania...

Irritability  
Elevated mood  
Racing thoughts  
Rapid speech

*Concern about weight gain*

...can obscure the person

# ABILIFY Helps Reveal

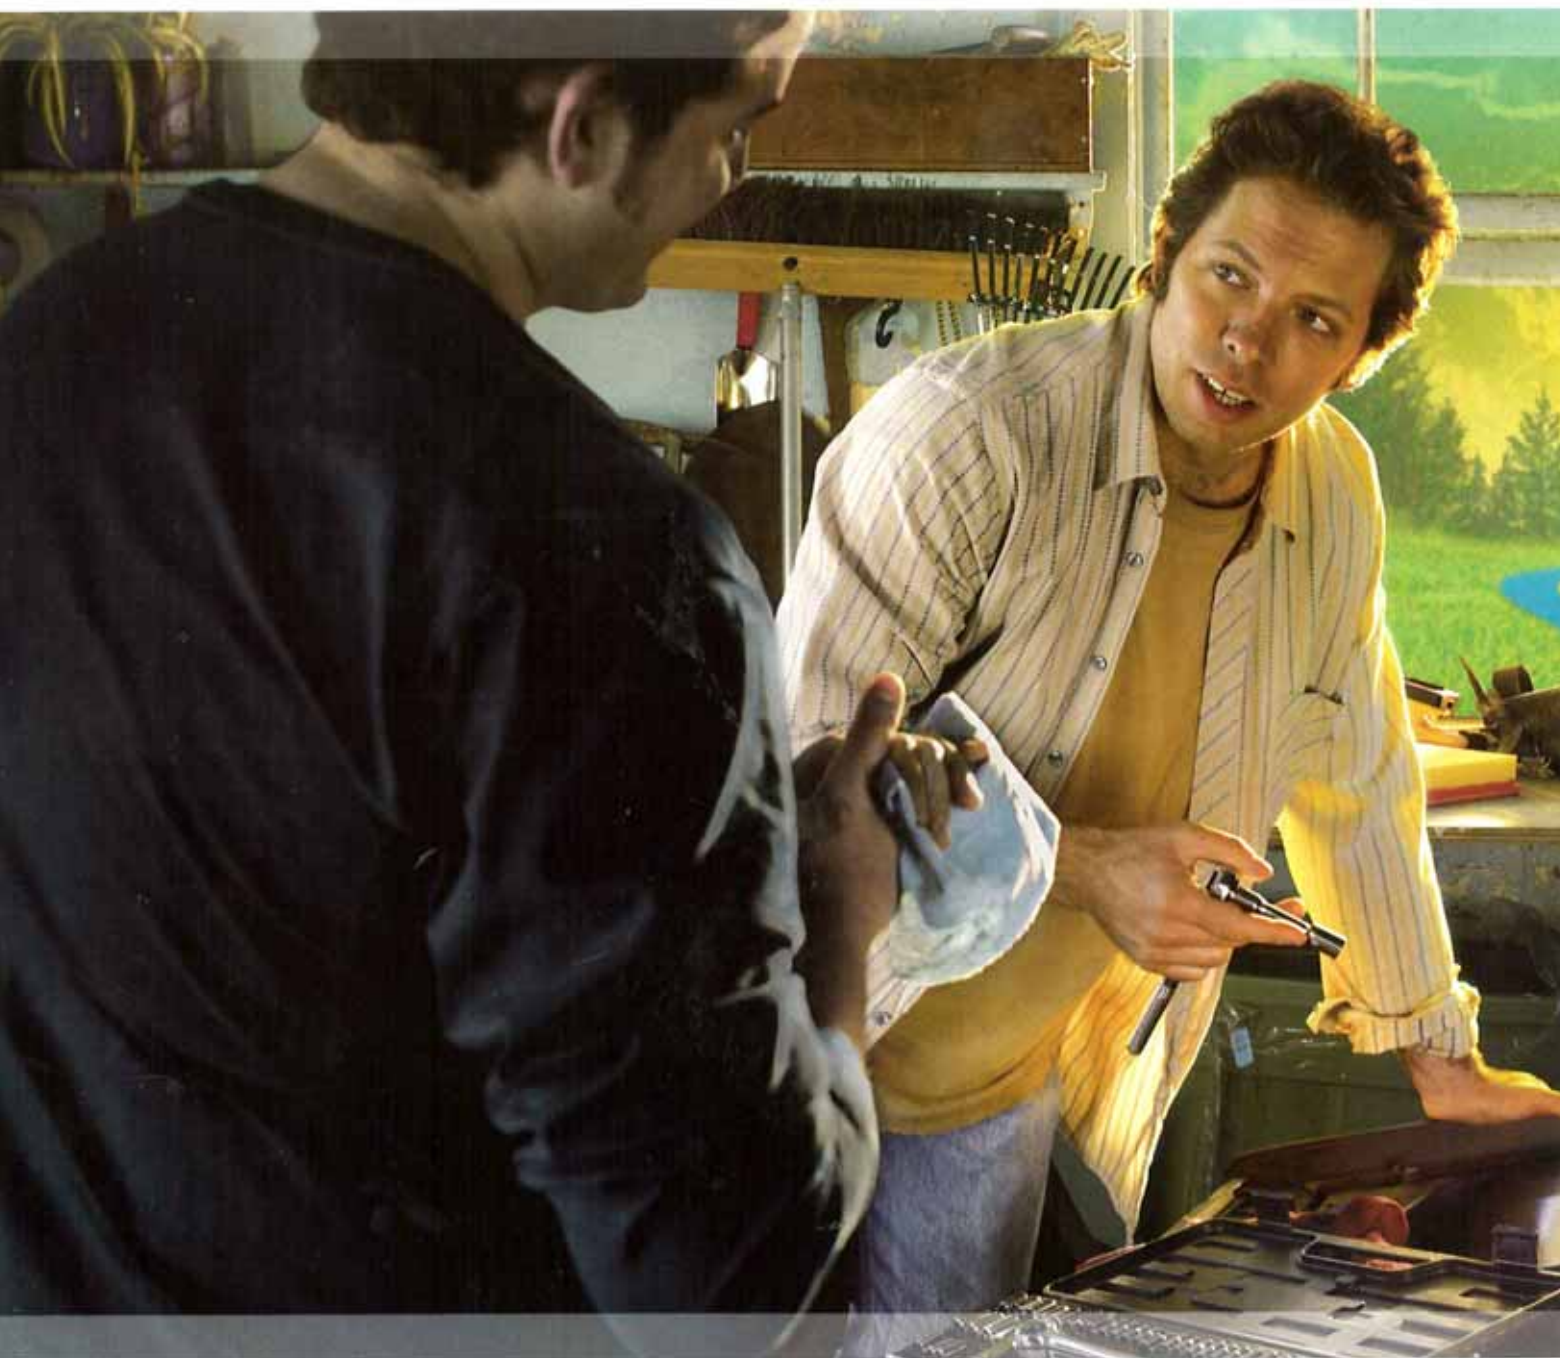

ABILIFY is indicated for the treatment of acute manic and mixed episodes associated with Bipolar I Disorder.

Elderly patients with dementia-related psychosis treated with atypical antipsychotic drugs are at an increased risk (1.6 to 1.7 times) of death compared to placebo (4.5% vs 2.6%, respectively). ABILIFY is not approved for the treatment of patients with dementia-related psychosis.

**HELP ILLUMINATE**

# The Person Within.

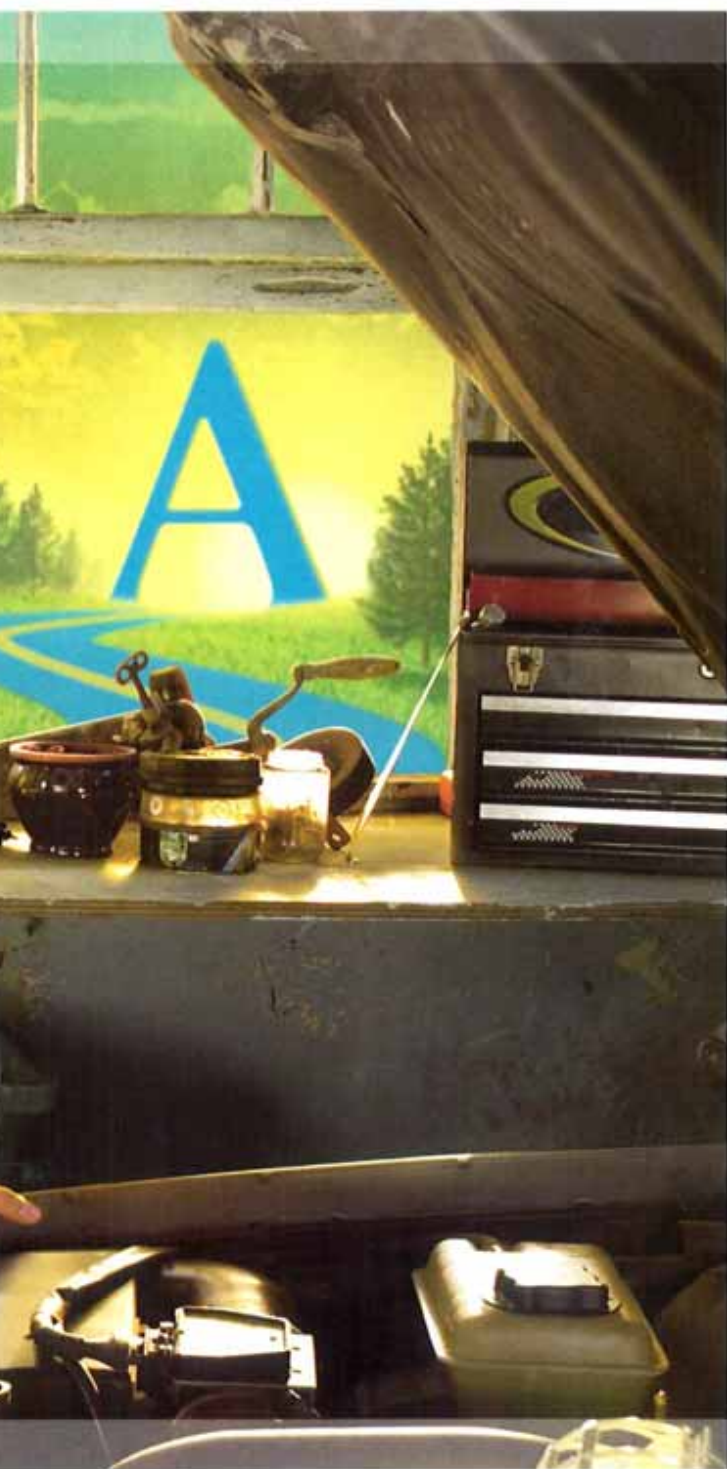

Meet Jason, age 31. He is a patient with Bipolar I Disorder, but he is also a car enthusiast, brother, and friend. He's so much more than his illness.

Do you have someone like Jason in your practice?

ABILIFY significantly reduced manic symptoms, as measured by Y-MRS\* Total Score, at primary endpoint (Day 21) in a 3-week, double-blind, placebo-controlled trial in patients with Bipolar I Disorder.<sup>1</sup>

In a 26-week Bipolar I Disorder maintenance trial, the mean change in weight was 0.5 kg for ABILIFY-treated patients compared to -1.7 kg for placebo-treated patients.

Some patients experienced significant weight gain. The percentage of patients meeting the weight gain criterion of  $\geq 7\%$  of baseline body weight was 13% for ABILIFY, 0% for placebo.<sup>2</sup>

\*Young Mania Rating Scale.

Please see IMPORTANT SAFETY INFORMATION, including Boxed WARNING, on following page.

THE PERSON WITHIN

  
**ABILIFY**<sup>®</sup>  
(aripiprazole)  
TABLETS and ORAL SOLUTION 1 mg/mL

## IMPORTANT SAFETY INFORMATION for ABILIFY

Elderly patients with dementia-related psychosis treated with atypical antipsychotic drugs are at an increased risk (1.6 to 1.7 times) of death compared to placebo (4.5% vs 2.6%, respectively). ABILIFY is not approved for the treatment of patients with dementia-related psychosis (see Boxed WARNING).

- **Neuroleptic malignant syndrome (NMS)**—As with all antipsychotic medications, a rare and potentially fatal condition known as NMS has been reported with ABILIFY. NMS can cause hyperpyrexia, muscle rigidity, diaphoresis, tachycardia, irregular pulse or blood pressure, cardiac dysrhythmia, and altered mental status. If signs and symptoms appear, immediate discontinuation is recommended.
- **Tardive dyskinesia (TD)**—The risk of developing TD and the potential for it to become irreversible may increase as the duration of treatment and the total cumulative dose increase. Prescribing should be consistent with the need to minimize TD. If signs and symptoms appear, discontinuation should be considered since TD may remit, partially or completely.
- **Cerebrovascular adverse events** (eg, stroke, transient ischemic attack), including fatalities, have been reported at an increased incidence in clinical trials of elderly patients with dementia-related psychosis treated with ABILIFY.

- **Hyperglycemia and diabetes mellitus**—Hyperglycemia, in some cases associated with ketoacidosis, coma, or death, has been reported in patients treated with atypical antipsychotics including ABILIFY. Patients with diabetes should be monitored for worsening of glucose control; those with risk factors for diabetes should undergo baseline and periodic fasting blood glucose testing. Patients who develop symptoms of hyperglycemia should also undergo fasting blood glucose testing. There have been few reports of hyperglycemia with ABILIFY.

### Treatment-emergent adverse events reported with:

#### ABILIFY Oral

In short-term trials of patients with schizophrenia (up to 6 weeks) or bipolar disorder (up to 3 weeks), the following were reported at an incidence  $\geq 10\%$  and greater than placebo, respectively: headache (30% vs 25%), anxiety (20% vs 17%), insomnia (19% vs 14%), nausea (16% vs 12%), vomiting (12% vs 6%), dizziness (11% vs 8%), constipation (11% vs 7%), dyspepsia (10% vs 8%), and akathisia (10% vs 4%).

#### ABILIFY Injection

In short-term (24 hour) trials, the following were reported at an incidence  $\geq 5\%$  and greater than placebo, respectively: headache (12% vs 7%), nausea (9% vs 3%), dizziness (8% vs 5%), and somnolence (7% vs 4%).

## ABILIFY for Bipolar I Disorder:

- Rapid control of agitation\*
- Early<sup>†</sup> and sustained symptom control
- Low incidence of somnolence/sedation<sup>‡</sup>
- Low mean weight change in clinical trials

— In a 26-week Bipolar I Disorder maintenance trial, the mean change in weight was 0.5 kg for ABILIFY-treated patients compared to -1.7 kg for placebo-treated patients.

Some patients experienced significant weight gain. The percentage of patients meeting the weight gain criterion of  $\geq 7\%$  of baseline body weight was 13% for ABILIFY, 0% for placebo.<sup>‡</sup>

\*With ABILIFY Injection at primary endpoint (2 hours). ABILIFY Injection is indicated for the treatment of agitation associated with Bipolar I Disorder.

<sup>†</sup>As early as Day 4 through study endpoint (Day 21).

<sup>‡</sup>ABILIFY 14%, placebo 7%.

Physicians who elect to use ABILIFY for extended periods should periodically re-evaluate the long-term usefulness of the drug for the individual patient.

Like other antipsychotics, ABILIFY may have the potential to **impair judgment, thinking, or motor skills**. Patients should not drive or operate hazardous machinery until they are certain ABILIFY does not affect them adversely.

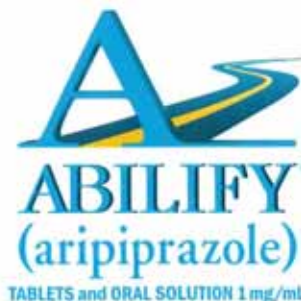

## HELP ILLUMINATE THE PERSON WITHIN

Please see BRIEF SUMMARY OF FULL PRESCRIBING INFORMATION, including **Boxed WARNING**, on adjacent pages.

**References:** 1. Sachs G, Sanchez R, Marcus R, et al. Aripiprazole in the treatment of acute manic or mixed episodes in patients with bipolar I disorder: a 3-week placebo-controlled study. *J Psychopharmacol.* 2006;20:536-546. 2. Keck PE Jr, Calabrese JR, McQuade RD, et al, for the Aripiprazole Study Group. A randomized, double-blind, placebo-controlled 26-week trial of aripiprazole in recently manic patients with bipolar I disorder. *J Clin Psychiatry.* 2006;67:626-637.





# 2008 Annual Meeting American Psychiatric Association

May 3-8 in exciting Washington DC

**Join colleagues  
from across the U.S.  
and 50 other countries for  
the psychiatry event of the year**

- The newest science and up-to-date practice information
- NIMH and special interest tracks
- Up to 66 hours of CME
- Networking, social activities, and fun with old friends

***Register early and save!***  
**To learn more,  
visit the Annual Meeting section at  
[www.psych.org](http://www.psych.org)**

WASHINGTON, DC

American Psychiatric Association  
161<sup>st</sup> ANNUAL MEETING

2008 MAY 3-8

**Our Voice in Action:**  
Advancing Science, Care and the Profession

APA, 1000 Wilson Boulevard, Suite 1825, Arlington, VA 22209-3901. Tel: 703.907.7300. Email [apa@psych.org](mailto:apa@psych.org)



# Anxiety disorders often other comorbid conditions<sup>1</sup>

In patients with **social anxiety disorder (SAD)**  
and a comorbid psychiatric disorder...

**In a study, SAD preceded  
the disorder in more than  
75% of cases<sup>3</sup>**

## **Facts about SAD**

- One of the most common anxiety disorders<sup>1</sup>
- Affects approximately 15 million American adults—about the same amount affected by major depressive disorder<sup>1</sup>
- A lifetime prevalence of over 13%<sup>4</sup>
- Frequently not identified<sup>5</sup>

## **SAD patients have an increased risk of developing<sup>3</sup>:**

- Obsessive compulsive disorder
- Major depressive disorder
- Panic disorder
- Drug and alcohol dependency

**References:** **1.** Kessler RC, Chiu WT, Demler O, Walters EE. Prevalence, severity, and comorbidity of 12-month DSM-IV disorders in the National Comorbidity Survey Replication. *Arch Gen Psychiatry.* 2005;62:617-627. **2.** National Institute of Mental Health. The Numbers Count: Mental Disorders In America. <http://www.nimh.nih.gov/publicat/numbers.cfm#MajorDepressive>. Accessed August 30, 2007. **3.** Schneier FR, Johnson J, Hornig CD, Liebowitz MR, Weissman MM. Social phobia: comorbidity and morbidity in an epidemiologic sample. *Arch Gen Psychiatry.* 1992;49:282-288. **4.** Magee WJ, Eaton WW, Wittchen H-U, McGonagle KA, Kessler RC. Agoraphobia, simple phobia, and social phobia in the National Comorbidity Survey. *Arch Gen Psychiatry.* 1996;53:159-168. **5.** Connor KM, Kobak KA, Churchill LE, Katzelnick D, Davidson JRT. Mini-Spin: a brief screening assessment for generalized social anxiety disorder. *Depress Anxiety.* 2001;14:137-140. **6.** Abramowitz JS, Storch EA, Keeley M, Cordell E. Obsessive-compulsive disorder with comorbid major depression: what is the role of cognitive factors? *Behav Res Ther.* In press. **7.** Obsessive-Compulsive Disorder. In: Sadock BJ, Sadock VA, eds. *Synopsis of Psychiatry.* 9th ed. Philadelphia, PA: Lippincott Williams & Wilkins; 2003:616-623. **8.** Obsessive-Compulsive Disorder. In: Hales RE, Yudofsky SC, Talbot JA, eds. *Textbook of Psychiatry.* 3rd ed. Washington, DC: American Psychiatric Press, Inc. 1999:600-610. **9.** American Psychiatric Association. Practice guideline for the treatment of patients with obsessive-compulsive disorder. [http://www.psych.org/psych\\_pract/treatg/pg/prac\\_guide.cfm](http://www.psych.org/psych_pract/treatg/pg/prac_guide.cfm). Accessed August 21, 2007.

DID  
KNOW

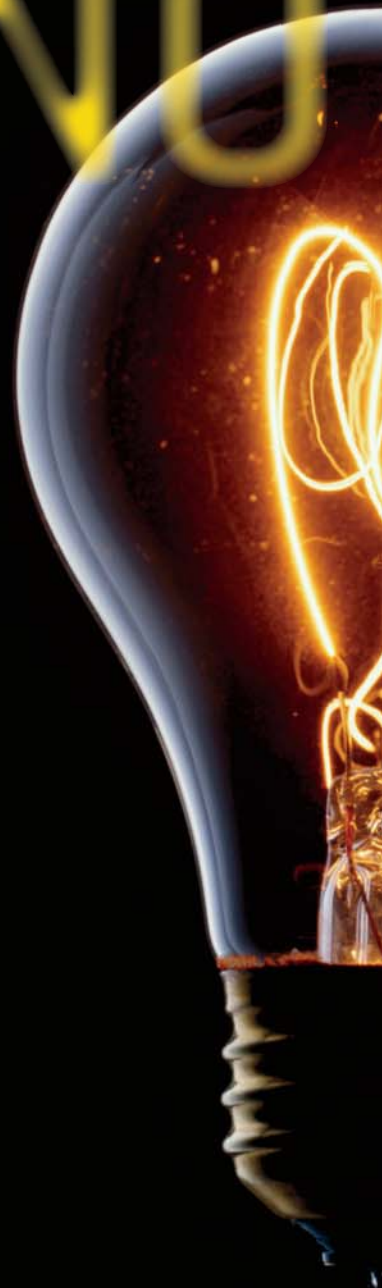

# present *first*, before

AFFECTING MORE THAN 40 MILLION  
AMERICAN ADULTS EACH YEAR<sup>2</sup>

*In patients with **obsessive compulsive disorder (OCD)**  
and comorbid depression...*

**OCD preceded the disorder,  
suggesting that mood disturbances  
may occur as a response to the  
functional impairment of OCD<sup>6</sup>**

#### **Facts about OCD**

- Affects about 2.2 million American adults<sup>1</sup>
- 67% of patients will have an associated lifetime diagnosis of major depressive disorder<sup>7</sup>
- Can be misdiagnosed as depression, psychosis, phobias, or personality disorder<sup>8</sup>

#### **OCD symptoms can be accompanied by<sup>9</sup>:**

- Eating disorders
- Other anxiety disorders
- Major depressive disorder
- Alcohol or drug abuse

**Early recognition and treatment  
of anxiety disorders are an important  
part of successful therapy**

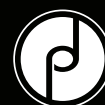

**Jazz Pharmaceuticals®**  
Innovation that performs

For the treatment of attention deficit hyperactivity disorder (ADHD)

# CONCERTA® CAN MAKE A DIFFERENCE

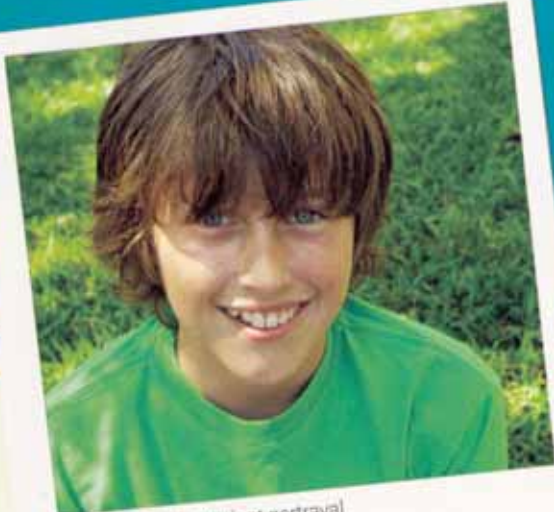

Representative patient portrayal

Meet Matthew, age 12, who has ADHD Combined Type with comorbid ODD\*

- Doesn't finish tests or schoolwork
- Forgets to do homework and chores
- Argues with teachers and parents

\*ODD=Oppositional Defiant Disorder; CD=Conduct Disorder.

## Consider CONCERTA® to give Matthew the help he needs

- Reduces ADHD symptoms in children with ADHD and ODD/CD\* as well as in patients with ADHD alone<sup>1</sup>
- Improves academic performance and classroom behavior in children with ADHD<sup>2</sup>
- Significantly reduces ADHD symptoms and conflict with family members in adolescents with ADHD<sup>3</sup>

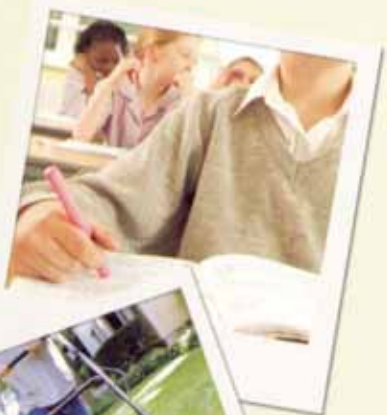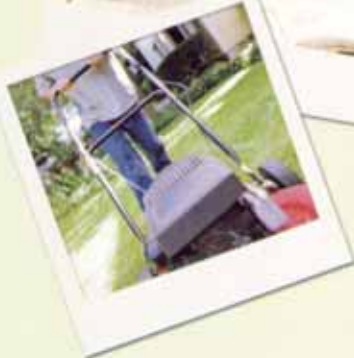

### Important Safety Information

CONCERTA® is indicated for the treatment of ADHD in children and adolescents. CONCERTA® should not be taken by patients with: significant anxiety, tension, or agitation; allergies to methylphenidate or other ingredients in CONCERTA®; glaucoma; Tourette's syndrome, tics, or family history of Tourette's syndrome; current/recent use of monoamine oxidase inhibitors (MAOIs). Children under 6 years of age should not take CONCERTA®. Abuse of methylphenidate may lead to dependence.

Use with caution in patients with psychosis, bipolar disorder, history of seizures/EEG abnormalities, and hypertension. CONCERTA® should not be used in patients with pre-existing severe gastrointestinal narrowing, known structural cardiac abnormalities, or other serious heart problems. Stimulants may cause new psychotic or manic symptoms; discontinuation of treatment may be appropriate. Aggressive behavior or hostility should be monitored in patients beginning treatment. Methylphenidate may produce difficulties with accommodation and blurring of vision. Hematologic monitoring is advised during prolonged therapy.

The most common adverse events reported in children aged 6 to 12 years receiving up to 54 mg were headache (14%), upper respiratory tract infection (8%), and abdominal pain (7%). The most common adverse events reported in adolescents receiving up to 72 mg were headache (9%), accidental injury (6%), and insomnia (5%).

Please see brief summary of full prescribing information and references on next page.

For more information, call 1-888-440-7903 or visit [www.concerta.net](http://www.concerta.net)

ONCE-DAILY

**CONCERTA®**  
methylphenidate HCl

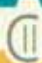

Extended-release tablets: 18 mg, 27 mg, 36 mg, 54 mg

*Delivering results that matter*

CON07-034

CONCERTA® and DRDS® are registered trademarks of ALZA Corporation.

© McNeil Pediatrics, Division of McNeil-PPC, Inc., 2007

Expires 6/08



FOR THE TREATMENT OF SCHIZOPHRENIA

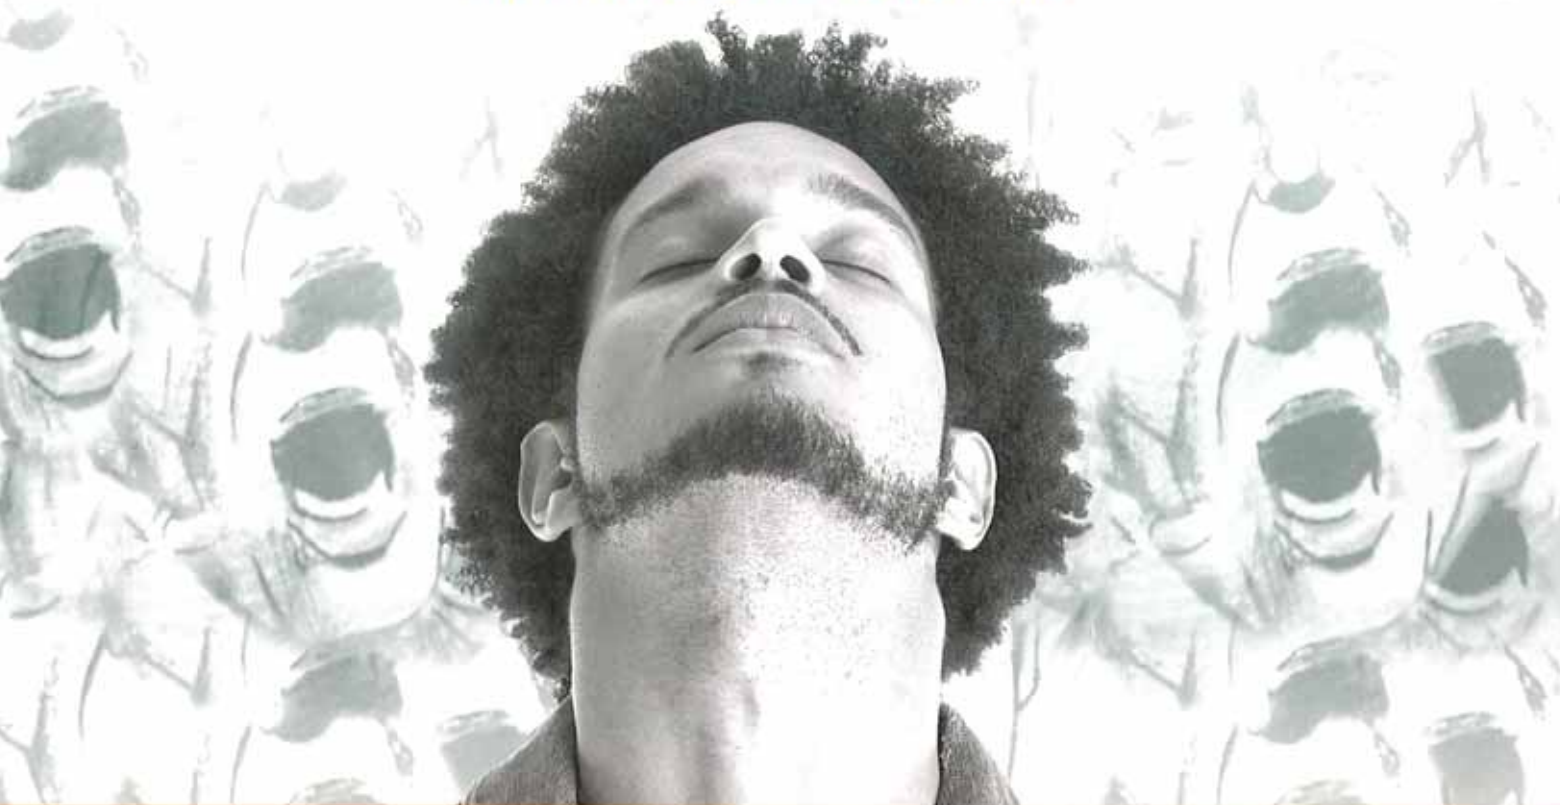

▲  
He Needs Powerful Efficacy for His Mind  
But What Will It Do to His Body?  
▼

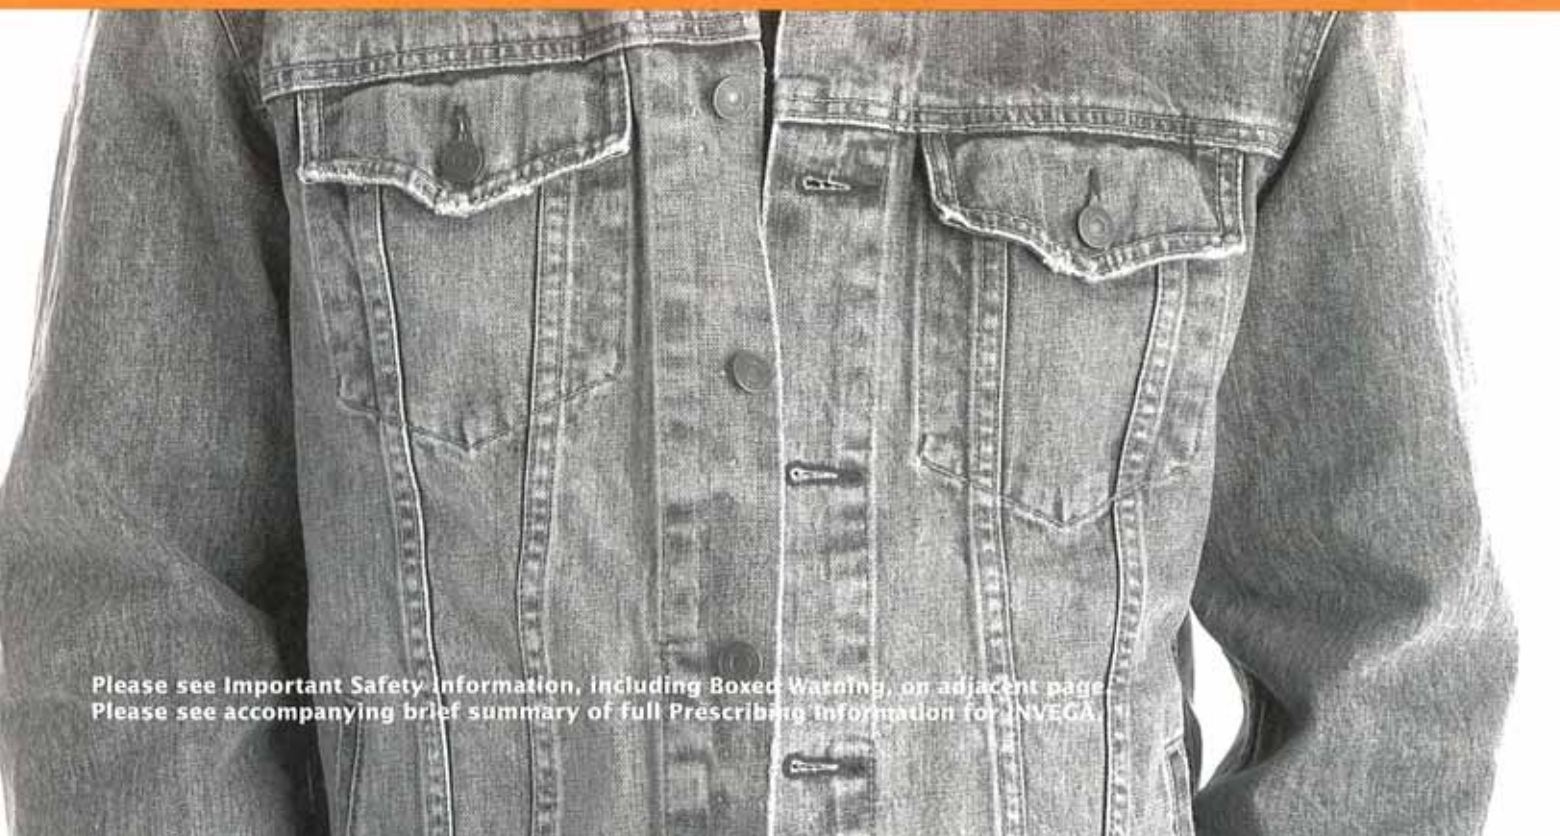

Please see Important Safety Information, including Boxed Warning, on adjacent page.  
Please see accompanying brief summary of full Prescribing Information for INVEGA.

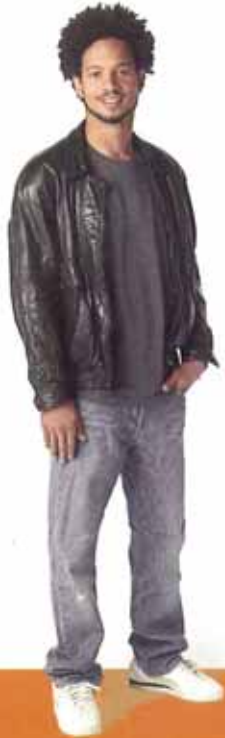

## Powerful Efficacy for the Mind

- Every dose proven to effectively control symptoms in every acute pivotal trial (6 weeks)<sup>1</sup>
- Demonstrated efficacy over the longer term by delaying time to relapse<sup>2</sup>
- The first antipsychotic to measure efficacy by improvements in personal and social performance<sup>3</sup>

# EXPERIENCE THE

## Proven Safety and Tolerability for the Body

- Weight gain comparable with placebo in 6-week clinical trials
- EPS rates comparable with placebo in 6-week trials with the recommended 6-mg dose<sup>\*</sup>
- Adverse event type and severity in a longer-term trial were similar to those seen in 6-week pivotal trials

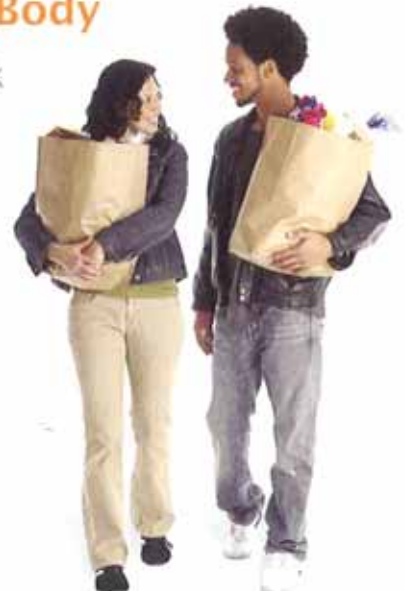

<sup>\*</sup>Total EPS-related adverse events at the 9-mg and 12-mg doses were 25% and 26%, respectively, versus 11% for placebo.

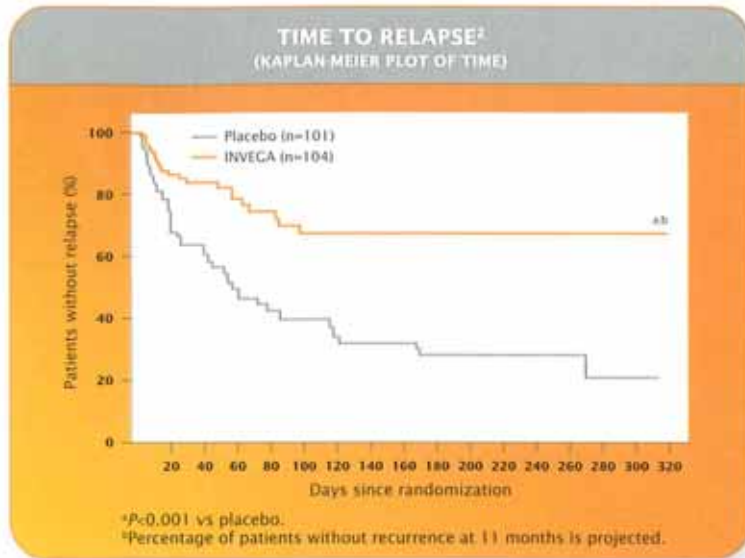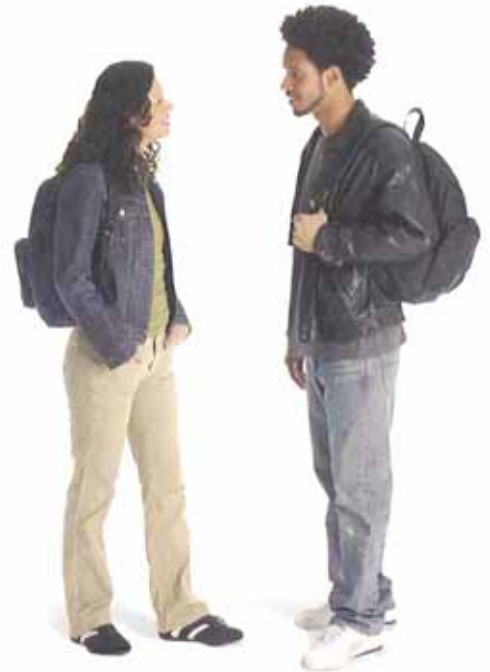

From Kramer et al.<sup>1</sup>

Results from a placebo-controlled study that included a 14-week run-in and stabilization phase, during which patients received INVEGA (3 mg to 15 mg) once daily until they were deemed stable, followed by a double-blind phase in which patients were maintained on a stable dose of INVEGA or given placebo for up to 11 months. The average dose of INVEGA was 10.8 mg (average 24 weeks). The trial was ended at a predetermined interim analysis due to occurrence of a total number of relapses between the 2 groups (mean duration of therapy with INVEGA and placebo was 74 days and 56 days, respectively).<sup>1,2</sup>

## BENEFITS OF INVEGA

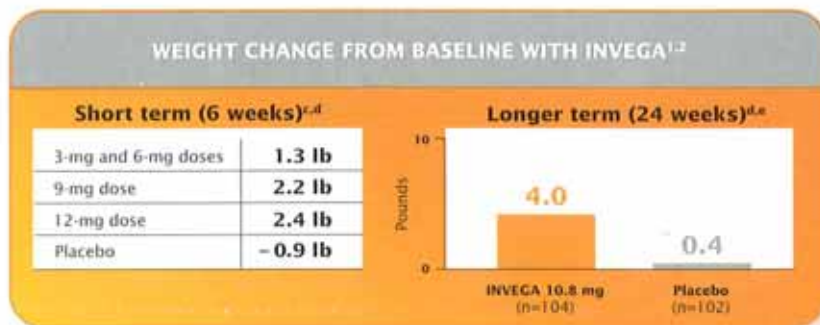

Data on file<sup>1</sup> and adapted from Kramer et al.<sup>1</sup>

<sup>1</sup>Pooled results from three 6-week pivotal trials.

<sup>2</sup>The proportion of patients gaining  $\geq 7\%$  of body weight with INVEGA was 7% (3 mg), 6% (6 mg), 9% (9 mg), and 9% (12 mg) versus 5% (placebo) in 6-week trials, and 20% (average 10.8 mg) versus 12% (placebo) in a longer-term, flexible-dose trial.

<sup>3</sup>Results from a longer-term trial of up to 11 months (average 24 weeks that includes a 14-week run-in and stabilization phase). The average dose of INVEGA was 10.8 mg.

Please see Important Safety Information, including Boxed Warning, on adjacent page.  
Please see accompanying brief summary of full Prescribing Information for INVEGA.

**INVEGA™**  
PALIPERIDONE  
Extended-Release Tablets  
STRENGTH FOR THE WHOLE PERSON

# INVEGA™

(paliperidone)

Extended-Release Tablets

BEFORE PRESCRIBING, PLEASE CONSULT COMPLETE PRESCRIBING INFORMATION OF WHICH THE FOLLOWING IS A BRIEF SUMMARY

Rx only

## Increased Mortality in Elderly Patients with Dementia-Related Psychosis

Elderly patients with dementia-related psychosis treated with atypical antipsychotic drugs are at an increased risk of death compared to placebo. Analyses of 17 placebo-controlled trials (modal duration of 10 weeks) in these subjects revealed a risk of death in the drug-treated subjects of between 1.6 to 1.7 times that seen in placebo-treated subjects. Over the course of a typical 10-week controlled trial, the rate of death in drug-treated subjects was about 4.5%, compared to a rate of about 2.6% in the placebo group. Although the causes of death were varied, most of the deaths appeared to be either cardiovascular (e.g., heart failure, sudden death) or infectious (e.g., pneumonia) in nature. INVEGA™ (paliperidone) Extended-Release Tablets is not approved for the treatment of patients with dementia-related psychosis.

**INDICATIONS AND USAGE:** INVEGA™ (paliperidone) Extended-Release Tablets is indicated for the acute and maintenance treatment of schizophrenia.

**CONTRAINDICATIONS:** INVEGA™ (paliperidone) is contraindicated in patients with a known hypersensitivity to paliperidone, risperidone, or to any components in the INVEGA™ formulation.

**WARNINGS: Increased Mortality in Elderly Patients with Dementia-Related Psychosis –** Elderly patients with dementia-related psychosis treated with atypical antipsychotic drugs are at an increased risk of death compared to placebo. INVEGA™ (paliperidone) Extended-Release Tablets is not approved for the treatment of dementia-related psychosis (see Boxed Warning). **QT Prolongation:** Paliperidone causes a modest increase in the corrected QT (QTc) interval. The use of paliperidone should be avoided in combination with other drugs that are known to prolong QTc including Class 1A (e.g., quinidine, procainamide) or Class III (e.g., amiodarone, sotalol) antiarrhythmic medications, antipsychotic medications (e.g., chlorpromazine, thioridazine), antibiotics (e.g., gatifloxacin, moxifloxacin), or any other class of medications known to prolong the QTc interval. Paliperidone should also be avoided in patients with congenital long QT syndrome and in patients with a history of cardiac arrhythmias. Certain circumstances may increase the risk of the occurrence of torsade de pointes and/or sudden death in association with the use of drugs that prolong the QTc interval, including (1) bradycardia; (2) hypokalemia or hypomagnesemia; (3) concomitant use of other drugs that prolong the QTc interval; and (4) presence of congenital prolongation of the QT interval. The effects of paliperidone on the QT interval were evaluated in a double-blind, active-controlled (moxifloxacin 400 mg single dose), multicenter QT study in adults with schizophrenia and schizoaffective disorder, and in three placebo- and active-controlled 6-week, fixed-dose efficacy trials in adults with schizophrenia. In the QT study (n = 141), the 8 mg dose of immediate-release oral paliperidone (n=44) showed a mean placebo-subtracted increase from baseline in QTcLD of 12.3 msec (90% CI: 8.9; 15.6) on day 8 at 1.5 hours post-dose. The mean steady-state peak plasma concentration for this 8 mg dose of paliperidone immediate-release was more than twice the exposure observed with the maximum recommended 12 mg dose of INVEGA™ (C<sub>max,ss</sub> = 113 and 45 ng/mL, respectively, when administered with a standard breakfast). In this same study, a 4 mg dose of the immediate-release oral formulation of paliperidone, for which C<sub>max,ss</sub> = 35 ng/mL, showed an increased placebo-subtracted QTcLD of 6.8 msec (90% CI: 3.6; 10.1) on day 2 at 1.5 hours post-dose. None of the subjects had a change exceeding 60 msec or a QTcLD exceeding 500 msec at any time during this study. For the three fixed-dose efficacy studies, electrocardiogram (ECG) measurements taken at various time points showed only one subject in the INVEGA™ 12 mg group had a change exceeding 60 msec at one time-point on Day 6 (increase of 62 msec). No subject receiving INVEGA™ had a QTcLD exceeding 500 msec at any time in any of these three studies. **Neuroleptic Malignant Syndrome:** A potentially fatal symptom complex sometimes referred to as Neuroleptic Malignant Syndrome (NMS) has been reported with antipsychotic drugs. Clinical manifestations of NMS are hyperpyrexia, muscle rigidity, altered mental status, and evidence of autonomic instability. Other signs may include elevated creatine phosphokinase, myoglobinuria (rhabdomyolysis), and acute renal failure. Management should include: discontinuation of the antipsychotic and other drugs not essential to therapy; intensive symptomatic treatment and medical monitoring; and treatment of other serious medical problems. If a patient requires antipsychotic drugs after recovery from NMS, the reintroduction of drug therapy should be carefully considered. The patient should be carefully monitored, since recurrences have been reported. **Tardive Dyskinesia:** A syndrome of potentially irreversible, involuntary, dyskinetic movements may develop in patients treated with antipsychotic drugs. The risk of developing and likelihood that it will become irreversible are believed to increase with the duration of treatment and the total cumulative dose. However, tardive dyskinesia can develop, after brief treatment periods at low doses. There is no known treatment for established cases of tardive dyskinesia, although it may remit, partially or completely, if the antipsychotic is withdrawn. Prescribing should be in a manner to minimize the occurrence. In patients who require chronic treatment, the smallest dose and the shortest duration of treatment producing a satisfactory clinical response should be sought. The need for continued treatment should be reassessed periodically. If signs and symptoms should appear drug discontinuation should be considered. **Hyperglycemia and Diabetes Mellitus:** Hyperglycemia, in some cases extreme and associated with ketoacidosis or hyperosmolar coma or death, has been reported in patients treated with atypical antipsychotics. Patients with an established diagnosis of diabetes mellitus who are started on atypical antipsychotics should be monitored regularly for worsening of glucose control. Patients with risk factors for diabetes mellitus (e.g., obesity, family history of diabetes) who are starting treatment with atypical antipsychotics should undergo fasting blood glucose testing at the beginning of treatment and periodically during treatment. **Gastrointestinal:** Because the INVEGA™ tablet is non-deformable and does not appreciably change in shape in the gastrointestinal tract, INVEGA™ should ordinarily not be administered to patients with pre-existing severe gastrointestinal narrowing (pathologic or iatrogenic, for example: esophageal motility disorders, small bowel inflammatory disease, "short gut" syndrome due to adhesions or decreased transit time, past history of peritonitis, cystic fibrosis, chronic intestinal pseudoobstruction, or Meckel's diverticulum). There have been rare reports of obstructive symptoms in patients with known strictures in association with the ingestion of drugs in non-deformable controlled-release formulations. Because of the controlled-release design of the tablet, INVEGA™ should only be used in patients who are able to swallow the tablet whole (see PRECAUTIONS: Information for Patients). A decrease in transit time, e.g., as seen with diarrhea, would be expected to decrease bioavailability and an increase in transit time, e.g., as seen with gastrointestinal neuropathy, diabetic gastroparesis, or other causes, would be expected to increase bioavailability. These changes in bioavailability are more likely when the changes in transit time occur in the upper GI tract. **Cerebrovascular Adverse Events, Including Stroke, in Elderly Patients With Dementia-Related Psychosis:** In placebo-controlled trials with risperidone, aripiprazole, and olanzapine in elderly subjects with dementia, there was a higher incidence of cerebrovascular adverse events (cerebrovascular accidents and transient ischemic attacks) including fatalities compared to placebo-treated subjects. INVEGA™ was not marketed at the time these studies were performed. INVEGA™ is not approved for the treatment of patients with dementia-related psychosis (see also

Boxed WARNING, WARNINGS: Increased Mortality in Elderly Patients with Dementia-Related Psychosis).

## PRECAUTIONS

**General: Orthostatic Hypotension and Syncope:** Paliperidone can induce orthostatic hypotension and syncope in some patients because of its alpha-blocking activity. In pooled results of the three placebo-controlled, 6-week, fixed-dose trials, syncope was reported in 0.8% (7/850) of subjects treated with INVEGA™ (3, 6, 9, 12 mg) compared to 0.3% (1/355) of subjects treated with placebo. INVEGA™ should be used with caution in patients with known cardiovascular disease (e.g., heart failure, history of myocardial infarction or ischemia, conduction abnormalities), cerebrovascular disease, or conditions that predispose the patient to hypotension (dehydration, hypovolemia, and treatment with antihypertensive medications). Monitoring of orthostatic vital signs should be considered in patients who are vulnerable to hypotension. **Seizures:** Like other antipsychotic drugs, INVEGA™ should be used cautiously in patients with a history of seizures or other conditions that potentially lower the seizure threshold. **Hyperprolactinemia:** Like other drugs that antagonize dopamine D<sub>2</sub> receptors, paliperidone elevates prolactin levels and the elevation persists during chronic administration. Paliperidone has a prolactin-elevating effect similar to that seen with risperidone, a drug that is associated with higher levels of prolactin than other antipsychotic drugs. Galactorrhea, amenorrhea, gynecostasia, and impotence have been reported in patients receiving prolactin-elevating compounds. An increase in the incidence of pituitary gland, mammary gland, and pancreatic islet cell neoplasia (mammary adenocarcinomas, pituitary and pancreatic adenomas) was observed in the risperidone carcinogenicity studies conducted in mice and rats (see PRECAUTIONS: Carcinogenesis, Mutagenesis, Impairment of Fertility). Neither clinical studies nor epidemiologic studies conducted to date have shown an association between chronic administration of this class of drugs and tumorigenesis in humans, but the available evidence is too limited to be conclusive. **Dysphagia:** Esophageal dysmotility and aspiration have been associated with antipsychotic drug use. Aspiration pneumonia is a common cause of morbidity and mortality in patients with advanced Alzheimer's dementia. INVEGA™ and other antipsychotic drugs should be used cautiously in patients at risk for aspiration pneumonia. **Suicide:** The possibility of suicide attempt is inherent in psychotic illnesses, and close supervision of high-risk patients should accompany drug therapy. **Potential for Cognitive and Motor Impairment:** Somnolence and sedation were reported in subjects treated with INVEGA™ (see ADVERSE REACTIONS). Antipsychotics, including INVEGA™, have the potential to impair judgment, thinking, or motor skills. Patients should be cautioned about performing activities requiring mental alertness, such as operating hazardous machinery or operating a motor vehicle, until they are reasonably certain that paliperidone therapy does not adversely affect them. **Priapism:** No cases of priapism have been reported in clinical trials with INVEGA™. **Thrombotic Thrombocytopenia Purpura (TTP):** No cases of TTP were observed during clinical studies with paliperidone. Although cases of TTP have been reported in association with risperidone administration, the relationship to risperidone therapy is unknown. **Body Temperature Regulation:** Disruption of the body's ability to reduce core body temperature has been attributed to antipsychotic agents. Appropriate care is advised when prescribing INVEGA™ to patients who will be experiencing conditions which may contribute to an elevation in core body temperature. **Antiemetic Effect:** An antiemetic effect was observed in preclinical studies with paliperidone. This effect, if it occurs in humans, may mask the signs and symptoms of overdosage with certain drugs or of conditions such as intestinal obstruction, Reye's syndrome, and brain tumor. **Use in Patients with Concomitant Illness:** Clinical experience with INVEGA™ in patients with certain concomitant illnesses is limited (see CLINICAL PHARMACOLOGY: Pharmacokinetics: Special Populations: Hepatic Impairment and Renal Impairment in full PI). Patients with Parkinson's Disease or Dementia with Lewy Bodies are reported to have an increased sensitivity to antipsychotic medication. Manifestations of this increased sensitivity include confusion, obtundation, postural instability with frequent falls, extrapyramidal symptoms, and clinical features consistent with the neuroleptic malignant syndrome. INVEGA™ has not been evaluated or used to any appreciable extent in patients with a recent history of myocardial infarction or unstable heart disease. Patients with these diagnoses were excluded from premarketing clinical trials. Because of the risk of orthostatic hypotension with INVEGA™, caution should be observed in patients with known cardiovascular disease (see PRECAUTIONS: General: Orthostatic Hypotension and Syncope). **Information for Patients:** Physicians are advised to discuss the following issues with patients for whom they prescribe INVEGA™. **Orthostatic Hypotension:** Patients should be advised that there is risk of orthostatic hypotension, particularly at the time of initiating treatment, re-initiating treatment, or increasing the dose. **Interference With Cognitive and Motor Performance:** As INVEGA™ has the potential to impair judgment, thinking, or motor skills, patients should be cautioned about operating hazardous machinery, including automobiles, until they are reasonably certain that INVEGA™ therapy does not affect them adversely. **Pregnancy:** Patients should be advised to notify their physician if they become pregnant or intend to become pregnant during treatment with INVEGA™. **Nursing:** Patients should be advised not to breast-feed an infant if they are taking INVEGA™. **Concomitant Medication:** Patients should be advised to inform their physicians if they are taking, or plan to take, any prescription or over-the-counter drugs, as there is a potential for interactions. **Alcohol:** Patients should be advised to avoid alcohol while taking INVEGA™. **Heat Exposure and Dehydration:** Patients should be advised regarding appropriate care in avoiding overheating and dehydration. **Administration:** Patients should be informed that INVEGA™ should be swallowed whole with the aid of liquids. Tablets should not be chewed, divided, or crushed. The medication is contained within a nonabsorbable shell designed to release the drug at a controlled rate. The tablet shell, along with insoluble core components, is eliminated from the body; patients should not be concerned if they occasionally notice something that looks like a tablet in their stool. **Drug Interactions: Potential for INVEGA™ to Affect Other Drugs –** Paliperidone is not expected to cause clinically important pharmacokinetic interactions with drugs that are metabolized by cytochrome P450 isozymes. *In vitro* studies in human liver microsomes showed that paliperidone does not substantially inhibit the metabolism of drugs metabolized by cytochrome P450 isozymes, including CYP1A2, CYP2A6, CYP2C8/9/10, CYP2D6, CYP2E1, CYP3A4, and CYP3A5. Therefore, paliperidone is not expected to inhibit clearance of drugs that are metabolized by these metabolic pathways in a clinically relevant manner. Paliperidone is also not expected to have enzyme inducing properties. At therapeutic concentrations, paliperidone did not inhibit P-glycoprotein. Paliperidone is therefore not expected to inhibit P-glycoprotein-mediated transport of other drugs in a clinically relevant manner. Given the primary CNS effects of paliperidone (see ADVERSE REACTIONS), INVEGA™ should be used with caution in combination with other centrally acting drugs and alcohol. Paliperidone may antagonize the effect of levodopa and other dopamine agonists. Because of its potential for inducing orthostatic hypotension, an additive effect may be observed when INVEGA™ is administered with other therapeutic agents that have this potential (see PRECAUTIONS: General: Orthostatic Hypotension and Syncope). **Potential for Other Drugs to Affect INVEGA™ –** Paliperidone is not a substrate of CYP1A2, CYP2A6, CYP2C9, and CYP2C19, so that an interaction with inhibitors or inducers of these isozymes is unlikely. While *in vitro* studies indicate that CYP2D6 and CYP3A4 may be minimally involved in paliperidone metabolism, *in vivo* studies do not show decreased elimination by these isozymes and they contribute to only a small fraction of total body clearance. **Carcinogenesis, Mutagenesis, Impairment of Fertility: Carcinogenesis:** Carcinogenicity studies of paliperidone have not been performed. **Carcinogenicity studies of risperidone,** which is extensively converted to paliperidone in rats, mice, and humans, were conducted in Swiss albino mice and Wistar rats. Risperidone was administered in the diet at daily doses of 0.63, 2.5, and 10 mg/kg for 18 months to mice and for 25 months to rats. A maximum tolerated dose was not achieved in male mice. There were statistically significant increases in pituitary gland adenomas, endocrine pancreas adenomas, and mammary gland adenocarcinomas. The no-effect dose for these tumors was less than or equal to the maximum



INVEGA™ (paliperidone) extended-release tablets is indicated for the acute and maintenance treatment of schizophrenia.

## IMPORTANT SAFETY INFORMATION FOR INVEGA

### Increased Mortality in Elderly Patients with Dementia-Related Psychosis

Elderly patients with dementia-related psychosis treated with atypical antipsychotic drugs are at an increased risk of death compared to placebo. Analyses of 17 placebo-controlled trials (modal duration of 10 weeks) in these patients revealed a risk of death in the drug-treated patients of between 1.6 to 1.7 times that seen in placebo-treated patients. Over the course of a typical 10-week controlled trial, the rate of death in drug-treated patients was about 4.5%, compared to a rate of about 2.6% in the placebo group. Although the causes of death were varied, most of the deaths appeared to be either cardiovascular (e.g., heart failure, sudden death) or infectious (e.g., pneumonia) in nature. INVEGA™ (paliperidone) is not approved for the treatment of patients with Dementia-Related Psychosis.

**Commonly observed adverse events:** The most commonly observed adverse events, occurring at an incidence of  $\geq 5\%$  and at least 2 times placebo, were akathisia and extrapyramidal disorder.

**QT Prolongation:** INVEGA causes a modest increase in the corrected QT (QTc) interval. INVEGA should be avoided in combination with other drugs that are known to prolong the QTc interval, in patients with congenital long QT syndrome or a history of cardiac arrhythmias. Certain circumstances may increase the risk of torsades de pointes and/or sudden death in association with the use of drugs that prolong the QTc interval.

**Neuroleptic Malignant Syndrome (NMS):** NMS, a potentially fatal symptom complex, has been reported with the use of antipsychotic medications, including INVEGA. Clinical manifestations include muscle rigidity, fever, altered mental status and evidence of autonomic instability (see full Prescribing Information). Management should include immediate discontinuation of antipsychotic drugs and other drugs not essential to concurrent therapy, intensive symptomatic treatment and medical monitoring, and treatment of any concomitant serious medical problems.

**Tardive Dyskinesia (TD):** TD is a syndrome of potentially irreversible, involuntary, dyskinetic movements that may develop in patients treated with antipsychotic medications. The risk of developing TD and the likelihood that dyskinetic movements will become irreversible are believed to increase with duration of treatment and total cumulative dose. Elderly patients appeared to be at increased risk for TD. Prescribing should be consistent with the need to minimize the risk of TD. The syndrome may remit, partially or completely, if antipsychotic treatment is withdrawn.

**Hyperglycemia and Diabetes:** Hyperglycemia, some cases extreme and associated with ketoacidosis or hyperosmolar coma or death, has been reported in patients treated with atypical antipsychotics (APS). Patients starting treatment with APS who have or are at risk for diabetes should undergo fasting blood glucose testing at the beginning of and during treatment. Patients who develop symptoms of hyperglycemia should also undergo fasting blood glucose testing.

**Gastrointestinal:** INVEGA should ordinarily not be administered to patients with pre-existing severe gastrointestinal narrowing. Rare instances of obstructive symptoms have been reported in patients with known strictures taking nondeformable formulations. INVEGA should only be used in patients who are able to swallow the tablet whole.

**Cerebrovascular Adverse Events (CAEs):** CAEs, including fatalities, have been reported in elderly patients with dementia-related psychosis taking atypical antipsychotics in clinical trials. INVEGA is not approved for treating these patients.

**Seizures:** INVEGA should be used cautiously in patients with a history of seizures.

**Hyperprolactinemia:** As with other drugs that antagonize dopamine D<sub>2</sub> receptors, INVEGA elevates prolactin levels and the elevation persists during chronic administration.

**Suicide:** The possibility of suicide attempt is inherent in psychotic illnesses and close supervision of high-risk patients should accompany drug therapy.

**Orthostatic Hypotension:** INVEGA may induce orthostatic hypotension associated with dizziness, tachycardia, and in some patients, syncope, especially during the initial dose-titration period. Monitoring should be considered in patients for whom this may be of concern. INVEGA should be used with caution in patients with known cardiovascular disease, and conditions that would predispose patients to hypotension.

**Potential for Cognitive and Motor Impairment:** INVEGA has the potential to impair judgment, thinking, or motor skills. Caregivers and patients should use caution until they are reasonably certain that INVEGA does not affect them adversely.

**Maintenance Treatment:** Physicians who elect to use INVEGA for extended periods should periodically re-evaluate the long-term risks and benefits of the drug for the individual patient.

**References:** 1. Data on file. Janssen, L.P., Titusville, NJ. 2. Kramer M, Simpson G, Maciulis V, et al. Paliperidone extended-release tablets for prevention of symptom recurrence in patients with schizophrenia: a randomized, double-blind, placebo-controlled study. *J Clin Psychopharmacol*. 2007;27(1):6-14. 3. Kane J, Canas E, Kramer M, et al. Treatment of schizophrenia with paliperidone extended-release tablets: a 6-week placebo-controlled trial. *Schizophr Res*. 2007;90:147-161.

Please see accompanying brief summary of full Prescribing Information for INVEGA.

recommended human dose of risperidone on a mg/m<sup>2</sup> basis (see risperidone package insert). An increase in mammary, pituitary, and endocrine pancreas neoplasms has been found in rodents after chronic administration of other antipsychotic drugs and is considered to be mediated by prolonged dopamine D<sub>2</sub> antagonism and hyperprolactinemia. The relevance of these tumor findings in rodents in terms of human risk is unknown (see PRECAUTIONS: General: Hyperprolactinemia). **Mutagenesis:** No evidence of genotoxic potential for paliperidone was found in the Ames reverse mutation test, the mouse lymphoma assay, or the *in vivo* rat micronucleus test. **Impairment of Fertility:** In a study of fertility, the percentage of treated female rats that became pregnant was not affected at oral doses of paliperidone of up to 2.5 mg/kg/day. However, pre- and post-implantation loss was increased, and the number of live embryos was slightly decreased, at 2.5 mg/kg, a dose that also caused slight maternal toxicity. These parameters were not affected at a dose of 0.63 mg/kg, which is half of the maximum recommended human dose on a mg/m<sup>2</sup> basis. The fertility of male rats was not affected at oral doses of paliperidone of up to 2.5 mg/kg/day, although sperm count and sperm viability studies were not conducted with paliperidone. In a subchronic study in Beagle dogs with risperidone, which is extensively converted to paliperidone in dogs and humans, all doses tested (0.31-5.0 mg/kg) resulted in decreases in serum testosterone and in sperm motility and concentration. Serum testosterone and sperm parameters partially recovered, but remained decreased after the last observation (two months after treatment was discontinued). **Pregnancy: Pregnancy Category C:** In studies in rats and rabbits in which paliperidone was given orally during the period of organogenesis, there were no increases in fetal abnormalities up to the highest doses tested (10 mg/kg/day in rats and 5 mg/kg/day in rabbits, which are 8 times the maximum recommended human dose on a mg/m<sup>2</sup> basis). In rat reproduction studies with risperidone, which is extensively converted to paliperidone in rats and humans, increases in pup deaths were seen at oral doses which are less than the maximum recommended human dose of risperidone on a mg/m<sup>2</sup> basis (see risperidone package insert). Use of first generation antipsychotic drugs during the last trimester of pregnancy has been associated with extrapyramidal symptoms in the neonate. These symptoms are usually self-limited. It is not known whether paliperidone, when taken near the end of pregnancy, will lead to similar neonatal signs and symptoms. There are no adequate and well controlled studies of INVEGA™ in pregnant women. INVEGA™ should be used during pregnancy only if the potential benefit justifies the potential risk to the fetus. **Labor and Delivery:** The effect of INVEGA™ on labor and delivery in humans is unknown. **Nursing Mothers:** In animal studies with paliperidone and in human studies with risperidone, paliperidone was excreted in the milk. Therefore, women receiving INVEGA™ should not breast-feed infants. **Pediatric Use:** Safety and effectiveness of INVEGA™ in patients < 18 years of age have not been established. **Geriatric Use:** The safety, tolerability, and efficacy of INVEGA™ were evaluated in a 6-week placebo-controlled study of 114 elderly subjects with schizophrenia (65 years of age and older, of whom 21 were 75 years of age and older). In this study, subjects received flexible doses of INVEGA™ (3 to 12 mg once daily). In addition, a small number of subjects 65 years of age and older were included in the 6-week placebo-controlled studies in which adult schizophrenic subjects received fixed doses of INVEGA™ (3 to 15 mg once daily, see CLINICAL PHARMACOLOGY: Clinical Trials in full PI). Overall, of the total number of subjects in clinical studies of INVEGA™ (n = 1796), including those who received INVEGA™ or placebo, 125 (7.0%) were 65 years of age and older and 22 (1.2%) were 75 years of age and older. No overall differences in safety or effectiveness were observed between these subjects and younger subjects, and other reported clinical experience has not identified differences in response between the elderly and younger patients, but greater sensitivity of some older individuals cannot be ruled out. This drug is known to be substantially excreted by the kidney and clearance is decreased in patients with moderate to severe renal impairment (see CLINICAL PHARMACOLOGY: Pharmacokinetics: Special Populations: Renal Impairment in full PI), who should be given reduced doses. Because elderly patients are more likely to have decreased renal function, care should be taken in dose selection, and it may be useful to monitor renal function (see DOSAGE AND ADMINISTRATION: Dosing in Special Populations in full PI).

#### ADVERSE REACTIONS

The information below is derived from a clinical trial database for INVEGA™ consisting of 2720 patients and/or normal subjects exposed to one or more doses of INVEGA™ for the treatment of schizophrenia. Of these 2720 patients, 2054 were patients who received INVEGA™ while participating in multiple dose, effectiveness trials. The conditions and duration of treatment with INVEGA™ varied greatly and included (in overlapping categories) open-label and double-blind phases of studies, inpatients and outpatients, fixed-dose and flexible-dose studies, and short-term and longer-term exposure. Adverse events were assessed by collecting adverse events and performing physical examinations, vital signs, weights, laboratory analyses and ECGs. Adverse events during exposure were obtained by general inquiry and recorded by clinical investigators using their own terminology. Consequently, to provide a meaningful estimate of the proportion of individuals experiencing adverse events, events were grouped in standardized categories using MedDRA terminology. The stated frequencies of adverse events represent the proportions of individuals who experienced a treatment-emergent adverse event of the type listed. An event was considered treatment emergent if it occurred for the first time or worsened while receiving therapy following baseline evaluation. The information presented in these sections was derived from pooled data from the three placebo-controlled, 6-week, fixed-dose studies based on subjects with schizophrenia who received INVEGA™ at daily doses within the recommended range of 3 to 12 mg (n = 850). Additional safety information from the placebo-controlled phase of the long-term maintenance study, in which subjects received INVEGA™ at daily doses within the range of 3 to 15 mg (n = 104), is also included. **Adverse Events Observed in Short-Term, Placebo-Controlled Trials of Subjects with Schizophrenia** The information presented in these sections were derived from pooled data from the three placebo-controlled, 6-week, fixed-dose studies based on subjects with schizophrenia who received INVEGA™ at daily doses within the recommended range of 3 to 12 mg (n = 850). Adverse Events Occurring at an Incidence of 2% or More Among INVEGA™-Treated Patients with Schizophrenia and More Frequent on Drug than Placebo Table 1 enumerates the pooled incidences of treatment-emergent adverse events that were spontaneously reported in the three placebo-controlled, 6-week, fixed-dose studies, listing those events that occurred in 2% or more of subjects treated with INVEGA™ in any of the dose groups, and for which the incidence in INVEGA™-treated subjects in any of the dose groups was greater than the incidence in subjects treated with placebo. **Treatment-Emergent Adverse Events in Short-Term, Fixed-Dose, Placebo-Controlled Trials in Adult Subjects with Schizophrenia.\*** **Body System or Organ Class** (Dictionary-derived Term) Percentage of Patients Reporting Event INVEGA™ Placebo (N=355) first, INVEGA™ dosage once daily 3 mg (N=127) second, 6 mg (N=235) third, 9 mg (N=246) fourth, 12 mg (N=242) fifth. **Percentage of subjects with adverse events** 66, 72, 66, 70, 76. **Cardiac disorders:** Atrioventricular block first degree 1, 2, 0, 2, 1; Bundle branch block 2, 3, 1, 3, <1, 0, 2; Sinus arrhythmia 0, 2, 1, 1, <1; Tachycardia 7, 14, 12, 14. **Eye disorders:** Vision blurred 1, 1, <1, 0, 2. **Gastrointestinal disorders:** Abdominal pain upper 1, 3, 2, 2; Dry mouth 1, 2, 3, 1, 3; Dyspepsia 4, 2, 3, 2, 5; Nausea 5, 6, 4, 4, 4; Salivary hypersecretion <1, 0, <1, 1, 4. **General disorders:** Asthenia 1, 2, <1, 2, 2; Fatigue 1, 2, 1, 2, 2; Pyrexia 1, 1, <1, 2, 2. **Investigations:** Blood insulin increased 1, 2, 1, 1, <1; Blood pressure increased 1, 2, <1, <1, 1; Electrocardiogram QT corrected interval prolonged 3, 3, 4, 3, 5; Electrocardiogram T wave abnormal 1, 2, 1, 2, 1. **Musculoskeletal and connective tissue disorders:** Back pain 1, 1, 1, 2; Pain in extremity 1, 0, 1, 0, 2. **Nervous system disorders:** Akathisia 4, 4, 3, 8, 10; Dizziness 4, 6, 5, 4, 5; Dystonia 1, 1, 1, 5, 4; Extrapyramidal disorder 2, 5, 2, 7, 7; Headache 12, 11, 12, 14, 14; Hypertonia 1, 2, 1, 4, 3; Parkinsonism 0, 0, <1, 2, 1; Somnolence 7, 6, 9, 10, 11; Tremor 3, 3, 3, 4, 3. **Psychiatric disorders:** Anxiety 8, 9, 7, 6, 5. **Respiratory, thoracic and mediastinal disorders:** Cough 1, 3, 2, 3, 2; **Vascular disorders:** Orthostatic hypotension 1, 2, 1, 2, 4. \*Table includes adverse events that were reported in 2% or more of subjects in any of the INVEGA™ dose groups and which occurred at greater incidence

than in the placebo group. Data are pooled from three studies; one included once-daily INVEGA™ doses of 3 and 9 mg, the second study included 6, 9, and 12 mg, and the third study included 6 and 12 mg (see CLINICAL PHARMACOLOGY: Clinical Trials in full PI). Events for which the INVEGA™ incidence was equal to or less than placebo are not listed in the table, but included the following: constipation, diarrhea, vomiting, nasopharyngitis, agitation, and insomnia. **Dose-Related Adverse Events in Clinical Trials:** Based on the pooled data from the three placebo-controlled, 6-week, fixed-dose studies, adverse events that occurred with a greater than 2% incidence in the subjects treated with INVEGA™, the incidences of the following adverse events increased with dose: somnolence, orthostatic hypotension, salivary hypersecretion, akathisia, dystonia, extrapyramidal disorder, hypertension and Parkinsonism. For most of these, the increased incidence was seen primarily at the 12 mg, and in some cases the 9 mg dose. **Common and Drug-Related Adverse Events in Clinical Trials** In the pooled data from three placebo-controlled, 6-week, fixed-dose studies, adverse events reported in 5% or more of subjects treated with INVEGA™ and at least twice the placebo rate for at least one dose included: akathisia and extrapyramidal disorder. **Extrapyramidal Symptoms (EPS) in Clinical Trials:** Pooled data from the three placebo-controlled, 6-week, fixed-dose studies provided information regarding treatment-emergent EPS. Several methods were used to measure EPS: (1) the Simpson-Angus global score (mean change from baseline) which broadly evaluates Parkinsonism, (2) the Barnes Akathisia Rating Scale global clinical rating score (mean change from baseline) which evaluates akathisia, (3) use of anticholinergic medications to treat emergent EPS, and (4) incidence of spontaneous reports of EPS. For the Simpson-Angus Scale, spontaneous EPS reports and use of anticholinergic medications, there was a dose-related increase observed for the 9 mg and 12 mg doses. There was no difference observed between placebo and INVEGA™ 3 mg and 6 mg doses for any of these EPS measures. **Percentage of Patients INVEGA™ Placebo (N=355) first, INVEGA™ dosage once daily 3 mg (N=127) second, 6 mg (N=235) third, 9 mg (N=246) fourth, 12 mg (N=242) fifth. EPS Group:** Parkinsonism \* 9, 11, 3, 15, 14; Akathisia † 6, 6, 4, 7, 9; Use of anticholinergic medications ‡ 10, 10, 9, 22, 22. \* For Parkinsonism, percent of patients with Simpson-Angus global score > 0.3 (Global score defined as total sum of items score divided by the number of items). † For Akathisia, percent of patients with Barnes Akathisia Rating Scale global score ≥ 2. ‡ Percent of patients who received anticholinergic medications to treat emergent EPS. **Percentage of Patients INVEGA™ Placebo (N=355) first, INVEGA™ dosage once daily 3 mg (N=127) second, 6 mg (N=235) third, 9 mg (N=246) fourth, 12 mg (N=242) fifth. EPS Group:** Overall percentage of patients with EPS-related AE 11.0, 12.6, 10.2, 25.2, 26.0; Dyskinesia 3.4, 4.7, 2.6, 7.7, 8.7; Dystonia 1.1, 0.8, 1.3, 5.3, 4.5; Hyperkinesia 3.9, 3.9, 3.0, 8.1, 9.9; Parkinsonism 2.3, 3.1, 2.6, 7.3, 6.2; Tremor 3.4, 3.1, 2.6, 4.5, 3.3; Dyskinesia group includes: Dyskinesia, Extrapyramidal disorder, Muscle twitching, Tardive dyskinesia Dystonia group includes: Dystonia, Muscle spasms, Oculogyration, Trismus. Hyperkinesia group includes: Akathisia, Hyperkinesia. Parkinsonism group includes: Bradykinesia, Cogwheel rigidity, Drooling, Hypertonia, Hypokinesia, Muscle rigidity, Musculoskeletal stiffness, Parkinsonism, Tremor group includes: Tremor. **Adverse Events Associated with Discontinuation of Treatment in Controlled Clinical Studies:** Based on the pooled data from the three placebo-controlled, 6-week, fixed dose studies, there was no difference in the incidence of discontinuation due to adverse events between INVEGA™-treated (5%) and placebo-treated (5%) subjects. The types of adverse events that led to discontinuation were similar for the INVEGA™- and placebo-treated subjects, except for Nervous System Disorders events which were more common among INVEGA™-treated subjects than placebo-treated subjects (2% and 0%, respectively), and Psychiatric Disorders events which were more common among placebo-treated subjects than INVEGA™-treated subjects (3% and 1%, respectively). **Demographic Differences in Adverse Reactions in Clinical Trials:** An examination of population subgroups in the three placebo-controlled, 6-week, fixed-dose studies did not reveal any evidence of differences in safety on the basis of age, gender or race (see PRECAUTIONS: Geriatric Use). **Laboratory Test Abnormalities in Clinical Trials:** In the pooled data from the three placebo-controlled, 6-week, fixed-dose studies, between-group comparisons revealed no medically important differences between INVEGA™ and placebo in the proportions of subjects experiencing potentially clinically significant changes in routine hematology, urinalysis, or serum chemistry, including mean changes from baseline in fasting glucose, insulin, c-peptide, triglyceride, HDL, LDL, and total cholesterol measurements. Similarly, there were no differences between INVEGA™ and placebo in the incidence of discontinuations due to changes in hematology, urinalysis, or serum chemistry. However, INVEGA™ was associated with increases in serum prolactin (see PRECAUTIONS: General: Hyperprolactinemia). **Weight Gain in Clinical Trials:** In the pooled data from the three placebo-controlled, 6-week, fixed-dose studies, the proportions of subjects having a weight gain of ≥ 7% of body weight were similar for INVEGA™ 3 mg and 6 mg (7% and 6%, respectively) and placebo (5%), but there was a higher incidence of weight gain for INVEGA™ 9 mg and 12 mg (9% and 9%, respectively). **Other Events Observed During the Premarketing Evaluation of INVEGA™:** The following list contains all serious and non-serious treatment-emergent adverse events reported at any time by individuals taking INVEGA™ during any phase of a trial within the premarketing database (n = 2720), except (1) those listed in Table 1 above or elsewhere in labeling, (2) those for which a causal relationship to INVEGA™ use was considered remote, and (3) those occurring in only one subject treated with INVEGA™ and that were not acutely life-threatening. Events are classified within body system categories using the following definitions: very frequent adverse events are defined as those occurring on one or more occasions in at least 1/10 subjects, frequent adverse events are defined as those occurring on one or more occasions in at least 1/100 subjects, infrequent adverse events are those occurring on one or more occasions in 1/100 to 1/1000 subjects, and rare events are those occurring on one or more occasions in less than 1/1000 subjects. **Blood and Lymphatic System Disorders:** rare: thrombocytopenia; **Cardiac Disorders:** frequent: palpitations; infrequent: bradycardia; **Gastrointestinal Disorders:** frequent: abdominal pain; infrequent: swollen tongue; **General Disorders:** infrequent: edema; **Immune Disorder:** rare: anaphylactic reaction; **Nervous System Disorders:** rare: coordination abnormal; **Psychiatric Disorders:** infrequent: confusional state; **Respiratory, Thoracic and Mediastinal Disorders:** frequent: dyspnea; rare: pulmonary embolus; **Vascular Disorders:** rare: ischemia, venous thrombosis; The safety of INVEGA™ was also evaluated in a long-term trial designed to assess the maintenance of effect with INVEGA™ in adults with schizophrenia (see CLINICAL PHARMACOLOGY: Clinical Trials in full PI). In general, adverse event types, frequencies, and severities during the initial 14-week open-label phase of this study were comparable to those observed in the 6-week, placebo-controlled, fixed-dose studies. Adverse events reported during the long-term double-blind phase of this study were similar in type and severity to those observed in the initial 14-week open-label phase. **Adverse Events Reported With Risperidone:** Paliperidone is the major active metabolite of risperidone. Adverse events reported with risperidone can be found in the ADVERSE REACTIONS section of the risperidone package insert.

#### DRUG ABUSE AND DEPENDENCE

**Controlled Substance:** INVEGA™ (paliperidone) is not a controlled substance.

For more information on symptoms and treatment of overdose, see full Prescribing Information.

10105901B

Issued: April 2007

© Janssen, L.P. 2006

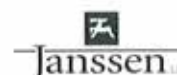

## Osler Institute 126<sup>th</sup> to 131<sup>st</sup> Psychiatry Review Courses

approved for AMA/PRA category 1 credit

### for Written Exams

May 7-11, 2008 – Chicago

### for Oral Boards

Optional didactic day & 3-day mock orals

January 14 & 15-17 – Portland, OR

February 15 & 16-18 – Tampa

### for Recertification

January 12-13 – Portland, OR

February 16-17, 2008 – Tampa

### for Child and Adolescent

May 8-11, 2008 – Chicago

*New – Best of Psych Audio*

Call Today: (800) 356-7537

[www.osler.org/y7za](http://www.osler.org/y7za)

Online CME OPPORTUNITIES from [www.MEASUREcme.org](http://www.MEASUREcme.org)

# MEASURE<sup>me</sup>

Modeling Effective Antipsychotic Therapeutic Success by Utilizing Real Evidence

EARN CME CREDITS FROM YOUR HOME  
OR OFFICE WHEN YOU HAVE THE TIME

#### ON-DEMAND CME LECTURE TOPICS

Evidence-Based Clinical Strategy: The Patient With Bipolar Disorder  
Management of Medical and Psychiatric Comorbidities in Patients  
with Bipolar Disorder

OVER 600 SLIDES ON BIPOLAR DISORDER  
AVAILABLE FOR DOWNLOAD

To participate or for more information:

[www.MEASUREcme.org](http://www.MEASUREcme.org)

or call us at 1-866-856-1998

CONTENT DEVELOPED BY  
EDUCATIONAL REVIEW BOARD

|                         |                              |                           |
|-------------------------|------------------------------|---------------------------|
| Henry A. Nasrallah, MD  | Joseph E. Goldberg, MD       | S. Charles Schulz, MD     |
| Peter F. Buckley, MD    | Paul E. Keck, Jr, MD         | Stephen M. Strakowski, MD |
| Joseph R. Calabrese, MD | Roger S. McIntyre, MD, FRCPC | Alan C. Swann, MD         |
| Andrew J. Cutler, MD    | Robert M. Post, MD           | Richard M. Trosch, MD     |
| Melissa P. DelBello, MD | Gary S. Sachs, MD            |                           |

MEASURE<sup>me</sup>™ (Modeling Effective Antipsychotic Therapeutic Success by Utilizing Real Evidence) is a national educational initiative designed to provide psychiatrists and other health care providers with several continuing and emerging areas of importance in the diagnosis and treatment of bipolar disorder.

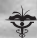

Sponsored by  
The France Foundation  
Continuing Medical Education Provider

Supported by an  
educational grant from  
AstraZeneca

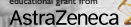

## Columbia University College of Physicians & Surgeons Department of Psychiatry

presents

### The 3rd Annual Advances in Psychiatry: A Guide to Clinical Practice April 4 & 5, 2008

at the

New York Academy of Medicine  
New York, New York

#### Program Description & Objectives

This conference is designed for psychiatrists in clinical practice and other mental health professionals involved in the treatment of psychiatric disorders in adults. The faculty of this conference will include members of the Department of Psychiatry at Columbia University College of Physicians and Surgeons and the New York State Psychiatric Institute. Faculty involved in research and academic programs will address common clinical dilemmas with practical solutions informed by available evidence. Course participants will acquire knowledge about the diagnosis and treatment of the major psychiatric illnesses in adults, with a focus on the integration of recent research findings in clinical decision-making. At the conclusion of the program they will be better able to use research findings to manage clinical situations and to evaluate new data as it emerges.

**Course Directors: Frederic Kass, M.D., Jeffrey A. Lieberman, M.D.,  
Kelli Harding, M.D. & Mary S. Sciuotto, M.D.**

Approved for Category 1 Credits towards the AMA Physicians Recognition Award.

Contact: Center for Continuing Medical Education, 630 West 168th St, Unit 39, NY, NY 10032

Phone: (212) 305-3334 Fax: (212) 781-6047

e-mail: [cme@columbia.edu](mailto:cme@columbia.edu)

web site: <http://www.ColumbiaCME.org>

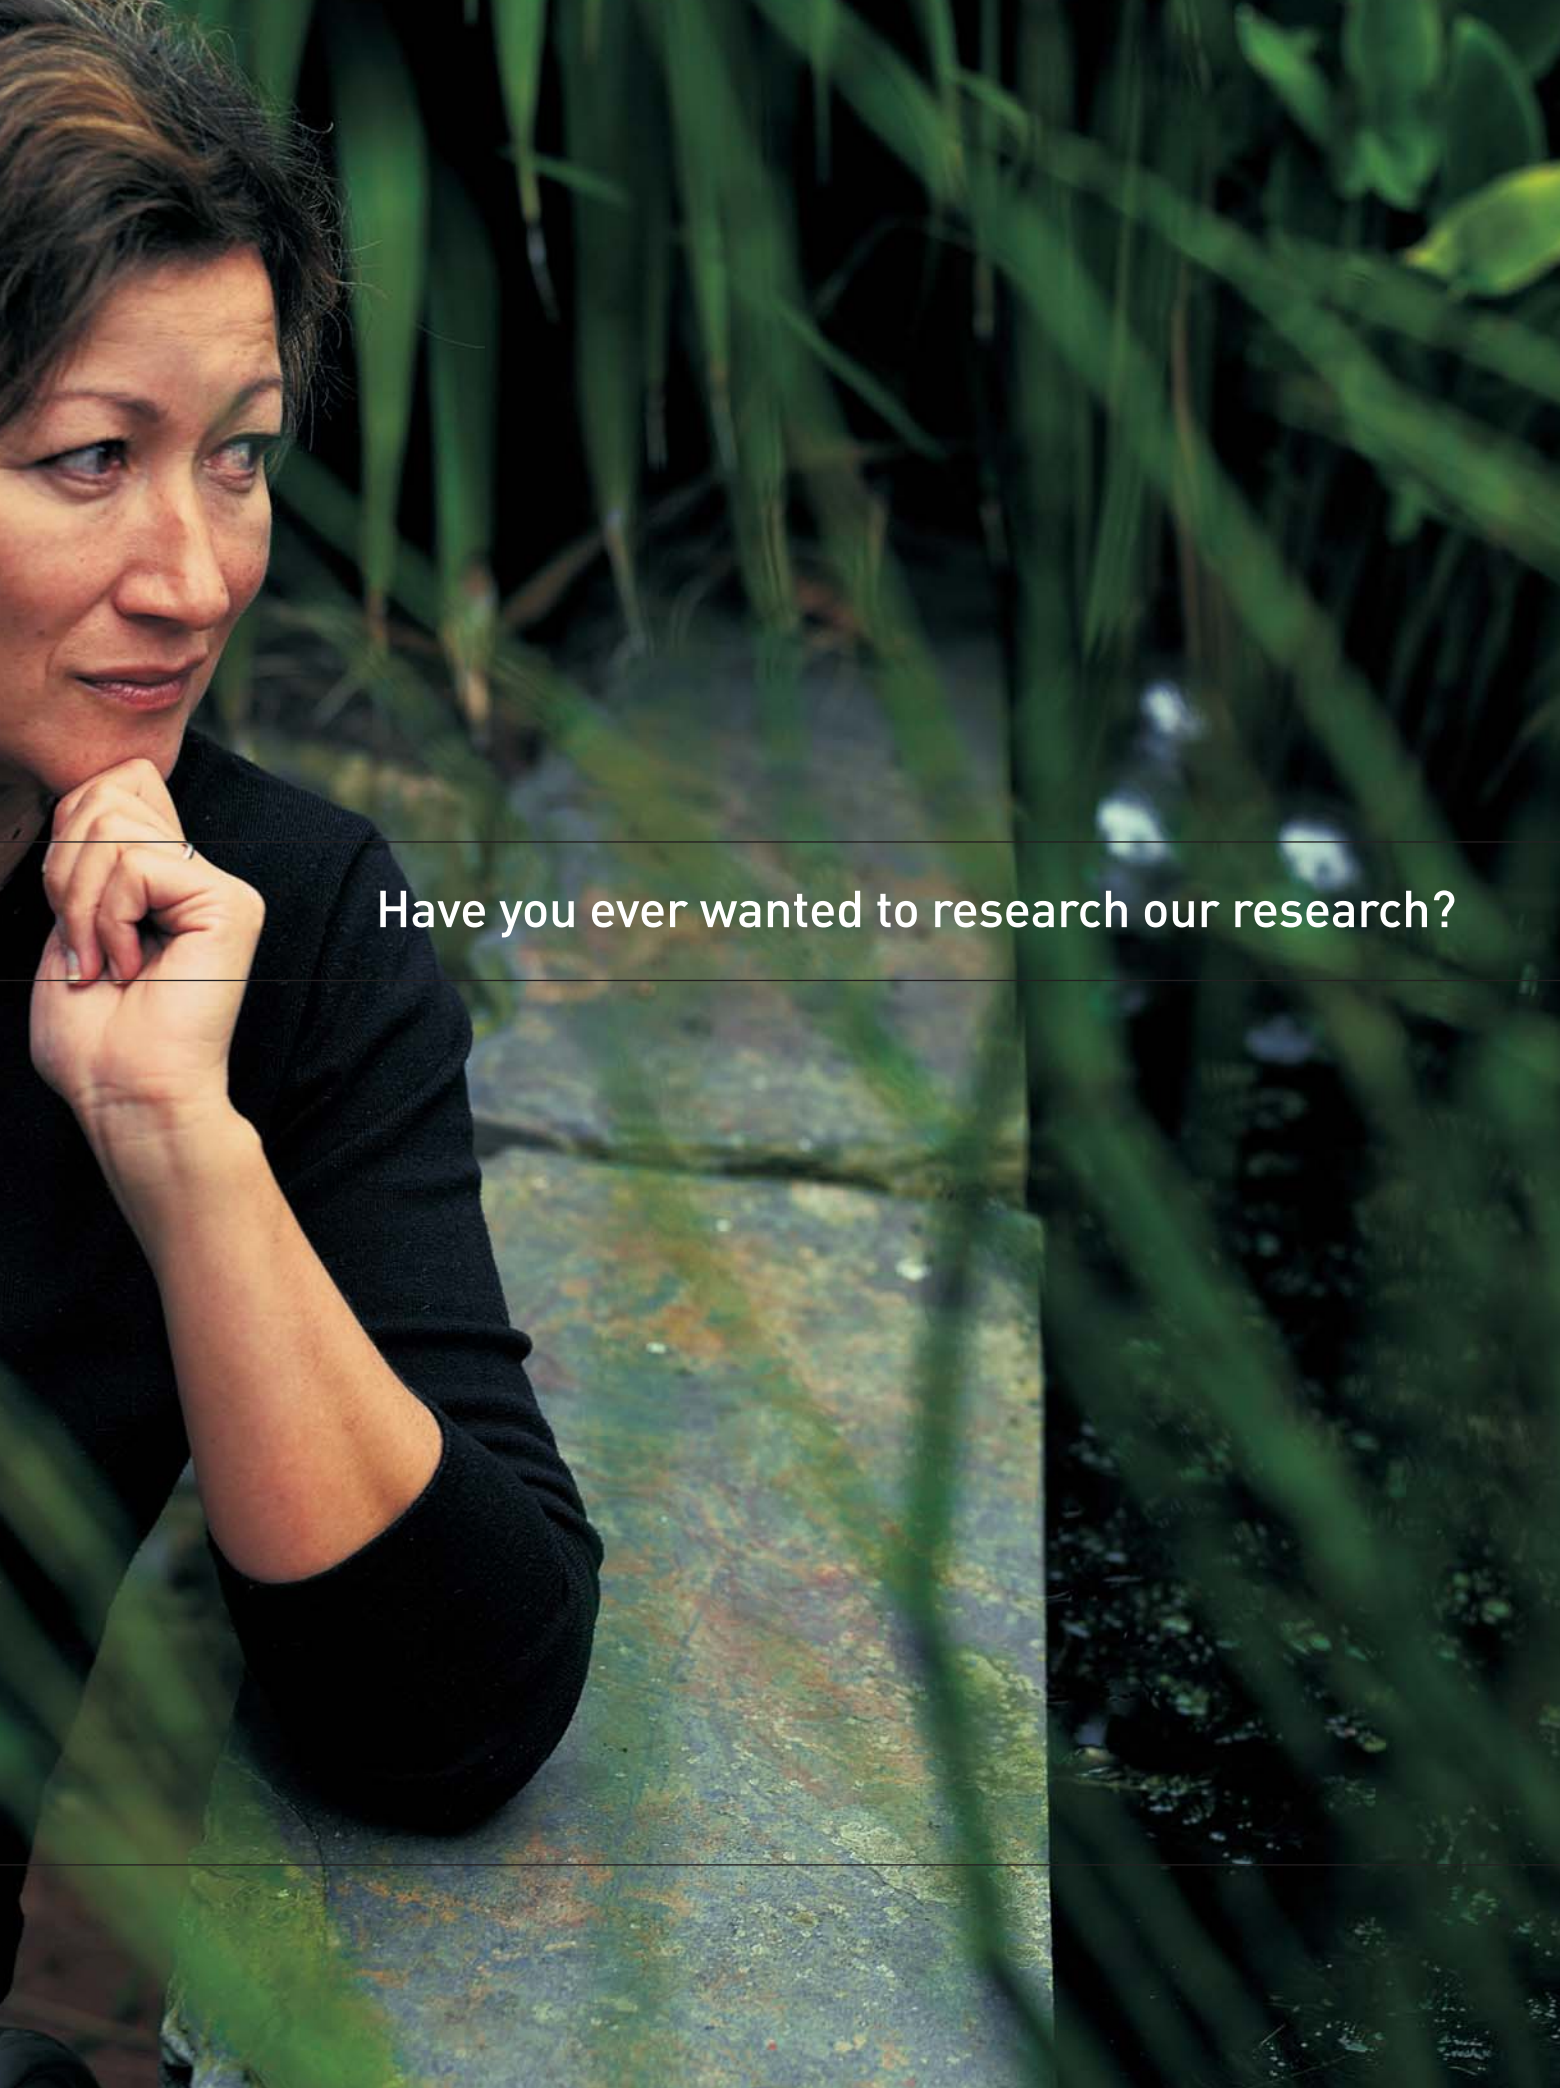

Have you ever wanted to research our research?

You can by visiting our Clinical Trial Registry.

Whether favorable or not, you'll find detailed summaries of clinical trial results posted for all Phase I-III studies at first approval/launch of a Lilly product, and all Phase II-IV thereafter. The site also includes bibliographies of published articles containing clinical trial results.

The accuracy and completeness of the registry are reviewed by an external, independent auditor whose findings are posted on the site.

To learn more, visit [www.lillytrials.com](http://www.lillytrials.com).

*Answers in action.*

MG48529-A 1107 PRINTED IN USA © 2007, ELI LILLY AND COMPANY. ALL RIGHTS RESERVED.

*Lilly*

Answers That Matter.

## SUPERVISORY PSYCHIATRIST

Iron Mountain, Michigan (Upper Peninsula)

Be a member of a team providing compassionate healthcare to veterans.

Iron Mountain VA Medical Center seeks a full-time Supervisory Psychiatrist for Mental Health Service. In conjunction with the Mental Health Service Chief, the individual is responsible for:

- Developing & maintaining equitable staffing patterns and work schedules
- Reviewing quality & performance measures and make recommendations
- Executive oversight of the quality of work performed by assigned staff
- Providing ongoing in-service education and ensures that assigned staff participate in required mandatory education and development activities
- Participating in the development of policies and procedures to assure effective management, ethics, safety, communication, and quality
- Working with medical wards and clinics to develop Primary Care based interventions that are safe and effective
- Ensuring compliance with the JCAHO standards & other regulatory bodies
- Operating as clinical lead in assigned specialty clinics and providing guidance for evidence based treatment interventions
- Providing professional direction for, and participate in, the treatment team which includes clinical staff
- Evaluating, developing and implementing treatment plans; dictating admission and discharge reports; preparing examining physician's reports for courts on commitment cases; attending court hearing for testimony

**Accepting Citizens and Non-Citizens, Licensure, Certification, or Registration, and prior supervisory experience.**

Interested candidates should send

CV and cover letter to:

Prudy Uttke, Human Resources (HR-05/PU)

5000 W. National Ave., Milwaukee, WI 53295

Fax: (414) 382-5296

Email: prudy.uttke@va.gov

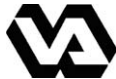

**IRON MOUNTAIN  
VA MEDICAL CENTER**  
Iron Mountain, Michigan U.P.  
EOE/Random Drug Screen

Full Benefits!

Opportunity to apply for the debt reduction program!

Malpractice covered under the Federal Tort Claims Act!

*The Iron Mountain community is located in an attractive, rural community of 13,000, offering ideal family living with clean air; safe, well staffed schools; low cost of living; and short commuting distance. Year-round recreational opportunities are available including hunting, skiing, and aquatic sports. Iron Mountain is located on the border of Michigan and Wisconsin. For area info. go to: <http://www.dickinsonchamber.com>*

## UNIVERSITY OF MISSOURI-COLUMBIA

### Chair of the Department of Psychiatry

The University of Missouri-Columbia (MU) School of Medicine is seeking nominations and applications for the position of Chair of the Department of Psychiatry. The candidate should have demonstrated leadership skills and a proven record of clinical and scholarly excellence. An M.D. or equivalent with appropriate board certification is required. Candidates with combined or subspecialty training are encouraged to apply. This is a unique opportunity for an outstanding academic and clinical leader to partner with faculty, administration, and stakeholders to build on our existing strengths to enhance educational programs and implement a new vision for the Department of Psychiatry at the MU School of Medicine.

The Department of Psychiatry has 12 full-time faculty (and several part-time faculty), representing general, forensic, geriatric, and child psychiatry, as well as clinical psychology. The Department is affiliated with a broad array of psychiatric facilities, including University Hospital, Harry S. Truman Memorial Veteran's Hospital, the Mid-Missouri Mental Health Center (MMMHC) (a 69-bed adult and child-adolescent inpatient treatment hospital), Fulton State Hospital (a full range inpatient forensic treatment facility), Royal Oaks Hospital (primarily a child-adolescent inpatient facility), and Burrell Behavioral Health (a community mental health center offering broad-spectrum outpatient services), and the Missouri Institute of Mental Health (a research training and policy center located in Saint Louis). The close proximity of the VA Hospital and MMMHC to the University Hospital minimizes travel time for residents and faculty and increases the options for collaboration.

Columbia is a vibrant, culturally rich, university community. The School of Medicine is located on the MU Campus which has a diverse enrollment of 28,000 students from every county in Missouri, every state in the nation and 100 countries. MU is one of the few universities in the country with medicine, veterinary medicine, and law all on one campus.

Inquiries, nominations or letters of interest that include a curriculum vitae should be directed to: **Jerry C. Parker, Ph.D., Associate Dean for Clinical Research and Development** or preferably by electronic mail to **ParkerJC@health.missouri.edu**. Screening will begin in January, 2008, and will continue until an appointment is made.

*AA/EOE; women and minorities are encouraged to apply.*

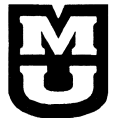

Visit the University of Missouri-Columbia's web site at <http://mujobs.missouri.edu>

## WELCOME TO BEAUTIFUL LAS VEGAS, NEVADA

**Seeking patient friendly and motivated Psychiatrist to join 2 fellowship trained Psychiatrists as part of our multi-specialty group practice.**

**Competitive compensation package to include: Malpractice, 401K, Medical/Dental, Profit Sharing, CME time off and Relocation expenses.**

*Great Opportunity!*

J-1 may apply.

**Fax Resume to 702-947-6702 or email [lpreston@pmclv.com](mailto:lpreston@pmclv.com).**

## PSYCHIATRISTS

*The VA Needs You*

Shreveport, LA  
Alexandria, LA  
Biloxi, MS

Pensacola, FA  
Mt. Vernon, MO

Fayetteville, AR  
Fort Smith, AR  
Mobile, AL

Psychiatrist positions require: BE/BC Psychiatrists, current, full, unrestricted licensure (any state), U.S. citizen Great Benefits, Excellent Pay, Rewarding Work. See announcements on [www.vacareers.va.gov](http://www.vacareers.va.gov). Recruitment/Relocation incentives may be authorized, ask contact individual for details.

**BILOXI/PENSACOLA/MOBILE** Outpatient and Inpatient Psychiatry positions. Expertise in telepsychiatry, substance abuse, geropsychiatry and PTSD preferred. BE/BC psychiatrist, state license (any state), U.S. citizen or permanent resident. Send applications to Jean Williams, HRMS (05A), 400 Veterans Avenue, Biloxi, MS or contact at [jean.williams@med.va.gov](mailto:jean.williams@med.va.gov) or (228) 523-5633.

**ALEXANDRIA** Strong clinical skills. Prefer experience in Geropsychiatry, Substance Abuse and/or PTSD. CV/Application to [tammie.arnold@va.gov](mailto:tammie.arnold@va.gov) or Tammie Arnold, Psychiatry Service (116), P.O. Box 69004, Alexandria, LA 71306-9004. (318) 473-0010 ext 2696.

**SHREVEPORT** Prefer experience in Substance Abuse, PTSD. Contact Kay Cox at (318) 221-8411, ext 6772 or [kay.cox@va.gov](mailto:kay.cox@va.gov). Email or mail your CV to VAMC, HRMS (05) KC, 510 E. Stoner Ave, Shreveport, LA 71101.

**FAYETTEVILLE, MT. VERNON, FORT SMITH** Contact Laura Berg, HRMS, at [laura.berg2@va.gov](mailto:laura.berg2@va.gov) or (479) 443-4301, ext 5191.

## #1 Integrated Health System

- ✓ Top 10 Clinic!
- ✓ Top 10 Hospital
- ✓ Low Cost Living

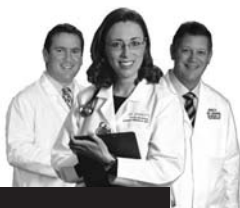

- Flexible Scheduling
- Family Friendly practice and community of 200k
- 30 Bed Inpatient Unit

A Psychiatrist, BC / BE, is being sought to join a three-physician Adult practice. Enjoy your life and practice with long-term physicians and staff. St. John's Clinic is a 480 physician multi-specialty clinic offering a very large referral base!

St. John's Regional Health Center, Springfield, Missouri is an 886-bed, level-one trauma center. St. John's Hospital serves as a referral hospital for 6+ regional hospitals serving 40 communities and covering 25,000 square miles.

SPRINGFIELD, MISSOURI, is located three hours south and southwest of Kansas City and St. Louis, respectively. A growing mid-sized city in the foothills of the Ozark Mountains, Springfield offers everything from Broadway performances and minor league and Division I athletics to outstanding schools and some of the best outdoor sporting opportunities available. Employment Review named Springfield one of the 20 "Best Places to Live and Work" in the U.S. Housing costs, projected job growth, education, healthcare, taxes, recreation, the arts, and general cost of living rates, make living and working here a pleasure. For more information about Springfield, go to [www.springfieldmo.org](http://www.springfieldmo.org).

### For more information, please contact:

**Julie A. Oliver,**  
Physician Recruiter  
St. John's Clinic  
Phone: 800-218-5079  
Fax: 888-290-8300  
E-mail: [JAOLiver@mercy.net](mailto:JAOLiver@mercy.net)  
EOE/AA Employer

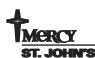

**ST. JOHN'S**  
POWERFUL MEDICINE

## STERLING MEDICAL Corporation

### PSYCHIATRISTS NEEDED

### TO LIVE AND WORK OVERSEAS

#### GERMANY JAPAN SOUTH KOREA

ADULT AND CHILD PSYCHIATRISTS

ONE AND TWO YEAR ASSIGNMENTS

Work with American families overseas

**RELOCATION AND REPATRIATION  
PROVIDED!**

Call Jason Jones at  
1-800-852-5678 or email  
[jjones@sterlingmedcorp.com](mailto:jjones@sterlingmedcorp.com)

### Child & Adult Psychiatrists-Assistant Professors Adult Psychiatrist-Associate Professor

The Department of Psychiatry at the University of Texas M. D. Anderson Cancer Center is recruiting board-certified/eligible child & adult psychiatrists at the Assistant Professor level and an adult psychiatrist at the Associate Professor level to join its full-time faculty. We seek individuals with experience or training in clinical consultation-liaison psychiatry/psycho-oncology and an interest in research. Our faculty provide clinical expertise in patient care and management for patients suffering with psychiatric and behavioral disturbances related to cancer treatment. The successful candidates would also participate in the training of psychiatry fellows, residents and medical students in the specialty of psycho-oncology. In addition, they would be responsible for the development and conduct of research related to behavioral, psychiatric and psychosocial problems in cancer patients and their families.

The University of Texas M. D. Anderson Cancer Center is the world's largest treatment facility for oncological diseases. It provides an exciting setting for patient care in the context of cutting-edge research and comprehensive cancer care. Located within the Texas Medical Center campus in Houston, our location provides access to a world-renowned medical community and the splendid cultural and recreational diversity of a sophisticated, metropolitan area that is the country's fourth-largest city.

Interested applicants should send a copy of their CV and a letter describing their clinical and academic interests to:

**Alan D. Valentine, M.D.,**  
Psychiatry Chairman, Ad Interim  
c/o Pat Semmelroge, Sr. Administrative Assistant  
UT M. D. Anderson Cancer Center  
P.O. Box 301402 - Unit 453  
Houston, TX 77230-1402  
Fax: (713) 792-8242  
E-mail: [avalenti@mdanderson.org](mailto:avalenti@mdanderson.org)  
Assistant: [psemmelr@mdanderson.org](mailto:psemmelr@mdanderson.org)

THE UNIVERSITY OF TEXAS  
MD ANDERSON  
CANCER CENTER  
*Making Cancer History®*

M. D. Anderson Cancer Center is an equal opportunity employer and does not discriminate on the basis of race, color, national origin, gender, sexual orientation, age, religion, disability or veteran status except where such distinction is required by law. All positions at The University of Texas M. D. Anderson Cancer Center are security sensitive and subject to examination of criminal history record information. Smoke-free and drug-free environment.

### Ozark Center Freeman Health System Joplin, Missouri

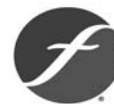

- Join 8 Psychiatrists
- Group Practice of Adult, Gero and Child/Adolescent Psychiatry
- BC/BE in Psychiatry
- 12,000 patients per year
- Medical Director, Inpatient, Outpatient and Residential opportunities available
- Excellent salary and fringe benefits with sign-on bonus and relocation expenses
- New graduates welcome

*Joplin, Missouri* – Service Area 450,000+

Great place to call home: low cost of living, excellent public and private schools including State University.

Cultural activities: Symphony, Ballet, International Piano Competition, Spiva Art Center, Joplin Little Theatre; Millennium Tennis Center; lakes, fishing, hunting; Larger metro areas nearby, Kansas City & Tulsa.

**Don't miss this opportunity,  
it is made for you!**

Call Lana 1-800-353-6812 or fax CV 417-347-9972  
Email: [Irhines@freemanhealth.com](mailto:Irhines@freemanhealth.com)  
[www.freemanhealth.com](http://www.freemanhealth.com)

The University of Miami (UM) Miller School of Medicine, Department of Psychiatry and Behavioral Sciences is in an exciting phase of growth and expansion with a new chairman, Julio Licinio, M.D.

We have Faculty opportunities at the Assistant/Associate Professor level in the following areas:

**Mood Disorders**  
**Psychotic Disorders**  
**Emergency Services**  
**Inpatient and Outpatient Services**  
**Child & Adolescent Psychiatry**  
**Consult/Liaison**  
**Forensics**

Find out more about our exciting opportunities at  
<http://psychiatry.med.miami.edu>.

Psychiatrists must possess two years or more experience in Psychiatric services. Duties include clinical evaluation and treatment of patients, teaching and supervision of medical students and psychiatry residents, and opportunities for participation in research and academic activities. Must be Board-Certified, Florida State license eligible and have suitable experience and credentials.

The University of Miami offers competitive compensation and excellent benefit packages, including college tuition remission for children.

Candidates should send cover letter, CV, and contact information for three recommendations to Dr. Ewald Horwath, Professor and Vice Chairman, Department of Psychiatry, University of Miami Miller School of Medicine, 1695 NW 9th Avenue, Suite 3100, Miami, FL 33136 or [mgerdes@med.miami.edu](mailto:mgerdes@med.miami.edu).

The University of Miami is an Equal Opportunity/Affirmative Action Employer.

## McLeod Regional Medical Center

A 453 bed, tertiary care and teaching facility, located in Florence, South Carolina is recruiting a full-time BC/BE Adult Psychiatrist. Offering a competitive salary guarantee and comprehensive benefits package to include paid professional liability Insurance, CME, and relocation assistance. Call 1/4. Inpatient/outpatient practice setting. 23 bed in-patient unit. Extensive support staff for hospital and ED consults.

The urban population of Florence is 70,000 with 130,000 in the county. Located 2 hours from historic Charleston, and 1 hour from the beach. Recent acknowledgements from Health Grades and the American Hospital Association have identified us as one of the top healthcare systems in the nation for our commitment to quality care and patient safety.

If you're interested in joining this nationally recognized hospital, please contact Tiffany Ellington @ 843-777-5169 or email [tellington@mcleodhealth.org](mailto:tellington@mcleodhealth.org).

## Scenic California Central Coast Atascadero State Hospital BE/BC Psychiatrist

Atascadero State Hospital now pays board certified psychiatrists starting at \$216,120 and advancing stepwise to \$247,320. Atascadero is the nation's premier center for the treatment of forensically committed mentally ill patients. Our hospital is a teaching site affiliated with the University of California, accredited by JCAHO, and recipient of the prestigious Codman Award. All of our psychiatrists are board eligible and most are board certified. Many of our psychiatrists have forensic subspecialty boards.

We are located midway between San Francisco and Los Angeles on the scenic central California Coast, south of Big Sur. We offer a spectacularly beautiful environment in San Luis Obispo County with temperate climate, beaches, world class wineries, cultural activities, golfing, sailing, riding, clean air, and excellent schools through the University level.

Our benefit package is valued at an additional 30%, which includes retirement plans (including safety retirement), health plans, professional liability coverage, paid holidays, educational leave, and generous annual leave. On-call duty is compensated hour for hour over and above the base salary. Applicants must hold a current California license, or have pending application with the Medical Board of California.

For a prompt and confidential review, send CV to Jeanne Garcia, M.D., P. O. Box 7001, Atascadero, CA 93423-7001; (805) 468-2005 or fax (805) 468-2138; or e-mail us at [jgarcia@ash.dmh.ca.gov](mailto:jgarcia@ash.dmh.ca.gov).

*We are an equal opportunity employer.*

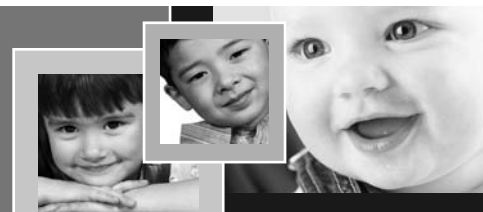

Your career means their **safe & healthy**

# start.

**Child and/or Adult Psychiatrists**  
**Opportunities Available in**  
**New Bedford, Springfield and Holyoke, MA**

The MSPCC is a private, non-profit society with a legacy of strengthening families and preventing child abuse through essential child welfare and mental health treatment and effective public advocacy.

We currently have full-time and part-time opportunities available for board-certified or board-eligible Child and/or Adult Psychiatrists. In this role, you will evaluate the psychological, neurological, and psycho-pharmacological status of clients; provide ongoing medication follow-up of clients; and provide direct psychotherapy when indicated.

Please send CV to: **Email: [recruitment@mspcc.org](mailto:recruitment@mspcc.org); OR Fax: 617.587.1586; OR Mail: Kim Wong and Dr. Sam Kelley, MSPCC, HR, 99 Summer St. 6th Floor, Boston, MA 02110 EEO/AA**

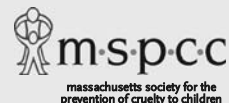

Find your way: [www.mspcc.org](http://www.mspcc.org)



## Top 100 Hospital expanding in Central Texas

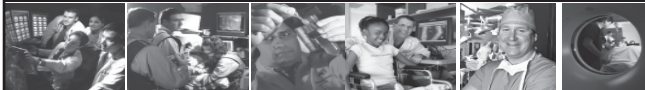

### Associate Chair Department of Psychiatry

Scott & White and Texas A&M HSC COM seek a Clinical/Academic psychiatrist to lead, manage, and expand an established clinical department as the Associate Chair of the Department of Psychiatry. Candidates should be recognized leaders in psychiatry with demonstrated superior clinical, administrative, and academic skills. The department is playing a critical role as Scott & White increases both its clinical services and academic and research programs. Scott & White is experiencing rapid programmatic growth, and is currently in the process of a \$250 million capital expansion to better meet the needs of our enlarging service area. Academic appointment is commensurate with experience and qualifications through Texas A&M University HSC COM, which is likewise expanding its clinical campuses in Temple and Round Rock.

Scott & White Clinic, a multi-specialty group practice with 550+ physicians, is part of the Scott & White integrated healthcare system which includes Scott & White Memorial Hospital, a 500+ bed tertiary referral center, fourteen supporting regional clinics, and a 180,000 member Scott & White Health Plan (HMO). Temple (with a surrounding population of over 100,000) is centrally located 1 hour north of Austin and an easy drive to the surrounding major metro areas of Dallas-Ft. Worth, Houston and San Antonio.

Scott & White offers a competitive incentive-based salary and comprehensive benefit package, which begins with four weeks vacation, three weeks CME and a generous retirement plan. For additional information, please contact: Kathryn J. Kotrla M.D., Chair, Department of Psychiatry; c/o Jason Culp, Physician Recruiter, Scott & White Clinic, 2401 S. 31st, Temple, TX 76508. (800) 725-3627 jculp@swmail.sw.org Scott & White is an equal opportunity employer. For more information on Scott & White, please visit our web site at: www.sw.org, and for more information about the Texas A&M HSC COM, please visit our web site at: www.tamhsc.edu.

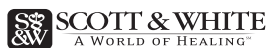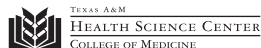

We offer the **largest**  
benefit package in America.

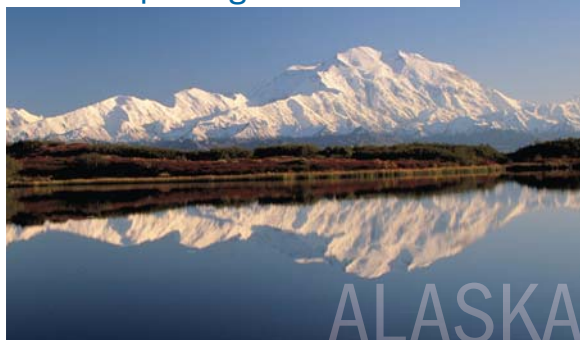

Fairbanks Memorial Hospital is looking for a full-time inpatient Psychiatrist who welcomes the idea of adventure and opportunity. Fairbanks has both, in a big way. You're surrounded by all the wonders of Alaska and have the chance to work in an outstanding medical facility.

For more information, call 888.303.5402 or e-mail Suzan.Bast@bannerhealth.com

fmhdc.com

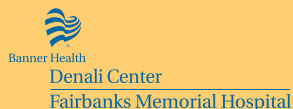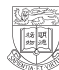

香港大學  
THE UNIVERSITY OF HONG KONG

Founded in 1911, The University of Hong Kong is committed to the highest international standards of excellence in teaching and research, and has been at the international forefront of academic scholarship for many years. Of a number of recent indicators of the University's performance, one is its ranking at 33 among the top 200 universities in the world by the UK's Times Higher Education Supplement. The University has a comprehensive range of study programmes and research disciplines, with 20,000 undergraduate and postgraduate students from 50 countries, and a complement of 1,200 academic members of staff, many of whom are internationally renowned.

## Department of Psychiatry

Applications are invited for the following appointments in the Department of Psychiatry, from as soon as possible and with the possibility of renewal.

- 1. Professor: Chair of Psychiatry**  
(on a five-year fixed-term basis) (Ref.: RF-2007/2008-22)
- 2. Clinical Associate Professor/Clinical Assistant Professor**  
(on a four-year fixed-term basis) (Ref.: RF-2007/2008-266)

The Department of Psychiatry has a staff establishment comprising a clinical psychologist at Reader level, 2 Associate Professors/Senior Lecturers, 4 Lecturers/Assistant Professors, and a Chair Professor who has a joint appointment with the Genome Research Centre. Psychiatry is taught to medical students in the third and fifth years. Current research interests cover a comprehensive range of areas including genetics, experimental, cognitive, psychosocial, and rehabilitative aspects of Psychiatry. Inpatients and outpatients are treated together with the Hospital Authority team in a general hospital psychiatric unit at Queen Mary Hospital.

**For post (1)**, applicants should be medically qualified and possess a postgraduate specialist qualification in Psychiatry. The appointee is expected to provide academic leadership in both research and teaching, and undertake clinical service work in Queen Mary Hospital. The University reserves the right not to fill the post or to fill the post by invitation or to make an appointment at a lower level.

**For post (2)**, applicants should have a medical qualification registrable in Hong Kong, a postgraduate specialist qualification in Psychiatry and/or a proven track record in research. Candidates should provide a research plan with applications.

Further information on the Department can be obtained at <http://www.hku.hk/psychi/>.

**Annual salaries** will be in the following ranges (subject to review from time to time at the entire discretion of the University), with starting salary depending on qualifications and experience:

- |                                     |                                                                                         |
|-------------------------------------|-----------------------------------------------------------------------------------------|
| <b>Clinical Chair Professor</b>     | : within the clinical professorial range, the minimum of which is <i>circa</i> HK\$1.8M |
| <b>Clinical Associate Professor</b> | : HK\$778,260 - 1,471,680                                                               |
| <b>Clinical Assistant Professor</b> | : HK\$474,600 - 908,880                                                                 |
- (approximately US\$1 = HK\$7.8)

The appointments will attract a contract-end gratuity and University contribution to a retirement benefits scheme, totalling up to 15% of basic salary. Leave, medical and dental benefits, and a monthly cash allowance subject to the Rules on Prevention of Double Benefits on Housing will be offered to the successful appointees. At current rates, salaries tax does not exceed 16% of gross income.

**Further particulars and application forms** (272/302 amended) can be obtained at <https://www.hku.hk/apptunit/>; or from the Appointments Unit (Senior), Human Resource Section, Registry, The University of Hong Kong, Hong Kong (fax: (852) 2540 6735 or 2559 2058; e-mail: [senrappt@hkucc.hku.hk](mailto:senrappt@hkucc.hku.hk)). **Closes February 14, 2008. Candidates who are not contacted within 6 months of the closing date may consider their applications unsuccessful.**

*The University is an equal opportunity employer and is committed to a No-Smoking Policy*

# ADULT PSYCHIATRY OPPORTUNITY

## GEISINGER HEALTH SYSTEM

Geisinger Health System's Division of Psychiatry in Danville, PA, is seeking an adult psychiatrist. This position offers an excellent quality of life and an opportunity to work part-time or full-time depending on the needs of the candidate.

### This position offers:

- A flexible schedule – start/end times are negotiable, and the specific psychiatric interests and talents of applicants usually can be integrated into the needs of the practice. Opportunities include inpatient – outpatient – emergency – and consultation-liaison psychiatry.
- A wonderfully collaborative team of psychiatrists/psychologists with experience and expertise in a variety of psychiatric specialties.
- The support of multiple PAs, a nurse specialist and masters-level therapists.
- An excellent call schedule (1 in 7), most call via telephone from home.
- The opportunity to work in a comprehensive academic practice that sees a wide variety of clinical activity from pediatric to geriatric patients and diagnostic types and treatments (including ECT).
- Research opportunities through the Weis Center for Research and Geisinger Center for Health Research (both located on the campus of Geisinger Medical Center). Current research projects include studies on genomic schizophrenia, adolescent depression and improving the delivery of adult depression through primary care.
- An accredited Clinical Psychology Internship and the opportunity to teach pediatric and emergency medicine residents, as well as third year medical students from Temple University and Pennsylvania College of Osteopathic Medicine, with clinical appointments available.
- An established referral base through Geisinger Health System's 40 community medical groups, 3 hospitals, local/community physicians and the broad-base of third party contracts.

In the past two years Geisinger's Department of Psychiatry has added a 10-bed Adolescent Inpatient Unit at Geisinger South Wilkes-Barre, the neuro-psychiatry practice has doubled and added 2 post-doctoral fellows and Pediatric Psychiatry has experienced significant growth. At Geisinger, you'll experience the support, camaraderie and professional challenges of a leading practice while discovering the charms of Pennsylvania living... all while having the time and flexibility to enjoy your new quality of life.

### To discuss this opportunity, contact:

Kathy Kardisco, Recruiter, Geisinger Dept. of Pro. Staffing,  
100 North Academy Avenue, Danville, PA 17822-2428  
Phone: 1-800-845-7112 • Fax: 1-800-622-2515  
e-mail: [kkardisco@geisinger.edu](mailto:kkardisco@geisinger.edu)

*Geisinger is a drug-screening employer; EOE/DFW/AA/ADA.*

# GEISINGER

[WWW.GEISINGER.ORG/DOCJOBS](http://WWW.GEISINGER.ORG/DOCJOBS)

**STERLING MEDICAL**  
*Corporation*

## PSYCHIATRISTS NEEDED for

### EXCELLENT OPPORTUNITIES IN:

**CONNECTICUT  
TENNESSEE  
SOUTH CAROLINA**

Any state licensure  
Great compensation

Outpatient practice, no billing  
or collections, malpractice  
insurance provided.

Call Jason Jones at  
1-800-852-5678 or email  
[jjones@sterlingmedcorp.com](mailto:jjones@sterlingmedcorp.com)

## South Texas Veterans Health Care System

The South Texas Veterans Health Care System (STVHCS) serves one of the largest primary service areas in the nation. STVHCS is comprised of three divisions and has an annual operating budget of \$460 million. San Antonio is surrounded by beautiful Texas hill-country and offers an exceptional suburban lifestyle, excellent schools, and the festive atmosphere of an international city.

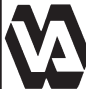

**Opportunity:** Associate Chief of Staff, Mental Health

**Location:** San Antonio

**Job Description:** Oversight responsibility for mental health operations for STVHCS, including strategic planning, establishment of policies and procedures, and performance monitoring.

**Opportunity:** Board-certified or board-eligible Psychiatrists

**Location:** San Antonio and other South Texas locations

**Job Description:** Provide treatment to an adult psychiatric population with diverse diagnoses including major affective disorders, psychotic disorders, PTSD, and substance use disorders.

**Selected Benefits:** Competitive compensation package  
Education debt reduction program  
Eligibility for relocation incentive  
Eligibility for academic appointment in the  
Department of Psychiatry at the University  
of Texas Health Science Center at  
San Antonio

**Contact:** Mr. Enrique Salas  
Human Resources Specialist  
210.617.5300 x14952  
[Enrique.Salas@va.gov](mailto:Enrique.Salas@va.gov)

# Opportunity of a Lifetime!

Live in "the jewel" of Central California with a growing population of over 100,000 and enjoy an abundance of cultural and recreational activities along with affordable housing.

This is an inpatient adult psychiatrist position in a hospitalist model at a 68-bed behavioral health facility. Work with a team of therapists, social workers, and nurses in providing consultation, pharmacotherapy, and psychotherapy to inpatients with diverse cases. The call coverage is one weekday night per week and one weekend in every four.

***This is truly an opportunity of a lifetime!***

Call 1-888-229-9495 for more information. Send your CV to wilkinstina@earthlink.net or fax it to Tina Wilkins at 916-536-9281.

## San Francisco Bay Area

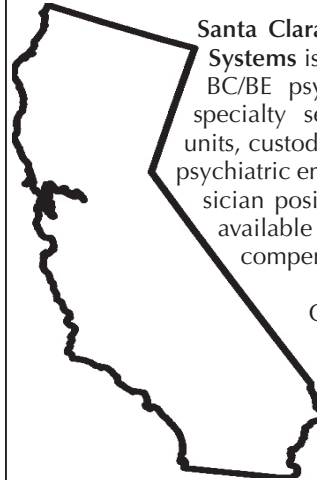

Santa Clara Valley Health and Hospital Systems is looking for full and part-time BC/BE psychiatrists to staff outpatient specialty services, inpatient psychiatric units, custody psychiatric services, and the psychiatric emergency room. Contract physician positions available. All positions available immediately. Very competitive compensation package.

Current California licensure is mandatory.

C.V. to:

Michael Meade, MD, Chairman  
Department of Psychiatry  
871 Enborg Court  
San Jose, California 95128  
Phone: 408.885.6122  
FAX: 408.885.6126

*We are a full service training campus, affiliated with Stanford University*

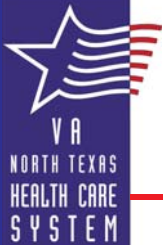

## COMPASSION, EXCELLENCE, AND DEDICATION TO OUR NATION'S VETERANS!

### PSYCHIATRIST (Mental Health Program Manager Position)

The VA Heart of Texas Health Care Network, Arlington, Texas is actively recruiting for a Board Certified Psychiatrist to serve as a Mental Health Program Manager, coordinating and planning mental health care throughout the Network, including ten medical centers and thirty-two Community Based Outpatient Clinics. The medical centers range from smaller, rural facilities to highly affiliated, tertiary care institutions. The Mental Health Program Manager is responsible for final decisions based on Department of Veterans Affairs policy, laws and regulations that govern mental health treatment practice, which directly and substantially affect the Mental Health Program, its facilities and related programs.

The duty station may be located at the Network Office, Arlington, TX; VA North Texas Health Care System, Dallas, TX; Central Texas Veterans Health Care System, Temple, TX; or South Texas Veterans Health Care System, San Antonio, TX.

Relocation expenses and a recruitment bonus are authorized.

The VA offers excellent benefits in a professional and rewarding environment, including 26 vacation days per year, 13 sick leave days per year/accumulates without limit, 10 paid holidays, generous retirement package including 401K savings plan with employer matching contributions, malpractice insurance paid by VA, Education Loan Repayment, and health and life insurance.

Candidates should forward their Curriculum Vitae, statement of professional goals and three references to:

Al Richard - Physician Recruiter (05) • 4500 S. Lancaster Road • Dallas, TX 75216 • AlcantiaD.Richard@va.gov or (214) 857-1685

## Faculty Positions in Neuromodulation Medical School, University of Minnesota

The University of Minnesota Medical School, its newly founded Institute of Translational Neuroscience, and its partner, University of Minnesota Physicians seek to hire faculty in the research area of Neuromodulation.

- 1) **Director of Neuromodulation:** The successful applicant will be a midcareer clinician investigator with rank and tenure status dependent on qualifications who can direct an integrated clinical neuromodulation program being developed by the departments of Neurology, Neurosurgery and Psychiatry in conjunction with the practice plan. Appointment is possible in any of the clinical neuroscience departments, i.e. Neurology, Neurosurgery, and Psychiatry, according to the individual's background and interests. The collaborating departments share a single administrative center. The successful applicant is expected to have clinical experience as well as an established research program that uses neuromodulation to treat diseases/disorders of the nervous system.
- 2) **Professor of Neuromodulation:** The successful applicant will be a physician-translational neuroscientist at the Assistant, Associate, or Full Professor level in the tenure track who is expected to have an established research program that uses neuromodulation to treat diseases/disorders of the nervous system. Appointment is possible in any of the clinical neuroscience departments and/or Department of Neuroscience.
- 3) **Professor and Director of Neuromodulation:** For an individual with the necessary interests and experience, combining the positions may be possible and appropriate.

For both positions, a record of ongoing extramural funding in the field is desirable. Areas of interest include but are not limited to degenerative diseases, movement disorders, dementia, depression, psychiatric disorders, developmental disorders, epilepsy, pain. These recruitments are supported by the practice plan, Medical School, and University's Institute of Translational Neuroscience. As one of the largest research universities in the country, the University of Minnesota offers a rich environment in basic, translational, and clinical neuroscience research, and a long tradition of collaborative interactions. The University of Minnesota in Minneapolis is located on an urban campus which overlooks the Mississippi River and which houses many colleges in addition to the Medical School and Academic Health Center. Starting date is negotiable.

Salary and start-up funds will be competitive and commensurate with education and experience. Candidates must have an M.D. degree or a combined M.D./Ph.D. degree and must be a U.S. citizen or be able to secure permanent residence status.

Applicants should send a current curriculum vitae, statement of research interests and intentions, and three letters of reference to:

**Neuromodulation Search Committee**  
**Attention: Walter C. Low, Ph.D., Chair, Search Committee**  
**Department of Neurosurgery, University of Minnesota**  
**2001 Sixth Street SE**  
**Minneapolis, MN 55455 USA**  
**or lowwalt@umn.edu**

Electronic versions of the required information may be e-mailed but must be followed with a hard-copy for the official search files. Review of applications will continue until positions are filled.  
*The University of Minnesota is an equal opportunity educator and employer.*

# The doctor is in.

Whether you are a practicing physician or talented applicant, the American Psychiatric Association (APA) Job Bank is your psychiatric job placement resource.

#### IN FOCUS

##### Candidates:

Post your résumé online for free.  
Search psychiatric jobs by specialty or location.  
Gain access to employment tools.

##### Employers:

Post psychiatric career opportunities quickly and easily.  
Tap into an online résumé database.  
Find the right candidate for your psychiatric position.

#### IN THE KNOW

Access sample cover letters and curriculum vitae,  
career development articles, salary surveys, interview  
worksheets and other tools on the APA Job Bank.

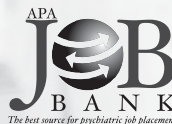

Visit [www.psych.org/jobbank](http://www.psych.org/jobbank) today.

Advertise your psychiatric opportunity in APA's *Psychiatric News* or *Psychiatric Services* classifieds and with the APA Job Bank online to receive a 10 percent discount on both. For more information, call (888) 35-PSYCH ext. 7330 or direct at (703) 907-7330, or email [classads@psych.org](mailto:classads@psych.org).

# Index to Advertisers December 2007

The publication of an advertisement in this journal does not imply endorsement of the product or service by the American Psychiatric Association.

|                                                         |                        |
|---------------------------------------------------------|------------------------|
| Association for the Advancement of Psychotherapy .....  | A10                    |
| AstraZeneca MEASURE.....                                | A43                    |
| Boehringer Ingelheim<br>Mirapex RLS.....                | A12-A15                |
| Bristol-Myers Squibb Company<br>Abilify .....           | A25-A30                |
| Columbia University .....                               | A43                    |
| Eli Lilly and Company<br>Corporate.....<br>Zyprexa..... | A46-A47<br>A6-A10, A23 |
| Employment Opportunities .....                          | A49-A55                |
| Janssen Pharmaceutica<br>Invega .....                   | A37-A42                |
| Jazz Pharmaceuticals<br>Corporate.....                  | A32-A33                |
| The Johns Hopkins University Press.....                 | A10                    |
| McNeil-PPC, Inc.<br>Concerta .....                      | A35-A36                |
| Osler Institute .....                                   | A11, A43               |
| U.S. Pharmaceuticals, Pfizer, Inc.<br>Geodon .....      | A17-A20                |
| Geodon IM .....                                         | C2-A1                  |
| University of Pittsburgh .....                          | A11                    |
| Vanda Pharmaceuticals .....                             | C4                     |

## Subscription and Business Information

The American Journal of Psychiatry, ISSN 0002-953X, is published monthly by the American Psychiatric Association, 1000 Wilson Blvd., Suite 1825, Arlington, VA 22209-3901. Subscriptions (per year): individual \$205.00, international \$308.00. For additional subscription options, including single issues and student rates, please contact Customer Service at 1-800-368-5777 or email [appi@psych.org](mailto:appi@psych.org). Institutional subscriptions are tier priced. For institutional site license or pricing information, contact Customer Service or visit <http://highwire.stanford.edu/tfocis/>.

Business communications, address changes, and subscription questions from APA members should be directed to the Division of Member Services: (888) 35-PSYCH (toll-free). Nonmember subscribers should call the Circulation Department (800) 368-5777. Author inquiries should be directed to the Journal editorial office: (703) 907-7885 or (703) 907-7884; fax (703) 907-1096; e-mail [ajp@psych.org](mailto:ajp@psych.org).

Business Management: Nancy Frey, Director, Publishing Services; Laura G. Abedi, Associate Director, Production; Brian Skepton, Advertising Sales and Marketing Manager, Nonpharmaceutical and Online Sales; Alison Jones, Advertising Prepress Manager; Robert Pursell, Director, Sales and Marketing.

Director, Advertising Sales: Raymond J. Purkis, Director, 2444 Morris Avenue, Union, NJ 07083; (908) 964-3100.

Pages are produced using Adobe FrameMaker+ SGML 6.0. Printed by RR Donnelley, Mendota, IL., on acid-free paper effective with Volume 164, Number 11, November 2007.

Periodicals postage paid at Arlington, VA, and additional mailing offices. POSTMASTER: Send address changes to The American Journal of Psychiatry, Circulation Department, American Psychiatric Association, 1000 Wilson Blvd., Suite 1825, Arlington, VA 22209-3901.

Indexed in Abstracts for Social Workers, Academic Abstracts, Biological Abstracts, Chemical Abstracts, Chicago Psychoanalytic Literature Index, Cumulative Index to Nursing Literature, Excerpta Medica, Hospital Literature Index, Index Medicus, International Nursing Index, Nutrition Abstracts, Psychological Abstracts, Science Citation Index, Social Science Source, and Social Sciences Index.

The American Psychiatric Association does not hold itself responsible for statements made in its publications by contributors or advertisers. Unless so stated, material in The American Journal of Psychiatry does not reflect the endorsement, official attitude, or position of the American Psychiatric Association or of the Journal's Editorial Board.

Authorization to photocopy items for internal or personal use, or the internal or personal use of specific clients, is granted by the American Psychiatric Association for libraries and other users registered with the Copyright Clearance Center (CCC) Transactional Reporting Service, provided that the base fee of \$15.00 per copy is paid directly to CCC, 222 Rosewood Drive, Danvers, MA 01923; (978) 750-8400 (tel), (978) 646-8600 (fax), [www.copyright.com](http://www.copyright.com) (web site). 0002-953X/05/\$15.00.

This consent does not extend to other kinds of copying, such as copying for general distribution, for advertising or promotional purposes, for creating new collective works, or for resale. Requests for commercial distribution should be directed to (703) 907-7894. APA does not require that permission be obtained for the photocopying of isolated articles for nonprofit classroom or library reserve use; all fees associated with such permission are waived.

Copyright © 2007 American Psychiatric Association.

# Read *The American Journal of Psychiatry* Online

Activate your FREE online access—It's as easy as 1, 2, 3!

To begin activation, go to [ajp.psychiatryonline.org](http://ajp.psychiatryonline.org) and click **SUBSCRIBE**

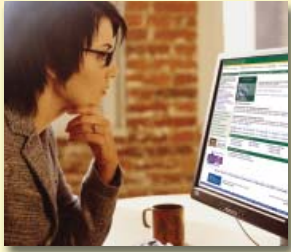

For APA Members and Other Individuals:

1. Click on **ACTIVATE** Your Member or Individual (Non-Member) Subscription
2. Locate your 10-digit Member/Customer Number\* on your journal mailing label above your name. Be sure to enter all 10 digits, including any leading zeros.
3. Enter your number in the box and click **SUBMIT**.

On the next screen, you'll register your subscription and create a username and password that can be used immediately to access your online subscription.

\*If you are an APA Member, in most cases the number on your label will be your Member Number; if it is not, please enter your APA Member Number (with enough leading zeros to create 10 digits) instead of the number on your mailing label.

For Institutions:

1. Click on **ACTIVATE** Your Institutional Subscription.
2. Locate your Customer Number on the journal mailing label above your name. Be sure to enter all 10-digits.
3. Enter your number in the box and click **SUBMIT**. On the next screen, you'll have the opportunity to enter IP addresses for your institution to provide seamless access for your patrons.

Member/Customer Number

AJP3000056866 CAR-RT LOT88 C-015  
John Q. Sample  
Mental Health Professional  
1000 Wilson Blvd STE 1825  
Arlington VA 22209-3924 01654

## Benefits of Online Activation

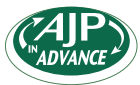

**AJP in Advance**—key research articles posted on the AJP website well in advance of their appearance in print.

**Back issue access to Volume 1, Issue 1**, starting with the *American Journal of Insanity* in 1844. (Available to institutions as a separate one-time purchase.)

**AJP CME**—interactive quizzes that offer *AMA PRA Category 1 Credits*<sup>™</sup> for selected articles from each issue (with paid subscription to the CME Course Program).

**AJP Audio**—MP3-format program summarizing findings from key articles from each issue.

**Residents' Journal**—the gateway to AJP articles and features that have most value to residents in their training.

**Precise and powerful searching** by author, keyword, and/or citation details—within any one journal, across the entire PsychiatryOnline journal collection, or across all HighWire journals.

**PubMed, CrossRef, and Google Scholar links**—from cited references to abstracts and full text; to similar articles; to other articles by the same lead authors.

**eTOCs**—Get advance email alerts with the table of contents from the latest issue.

The screenshot shows the homepage of the American Journal of Psychiatry website. At the top, there is a navigation bar with links for HOME, SEARCH, CURRENT ISSUE, PAST ISSUES, SUBSCRIBE, ALL APPI JOURNALS, HELP, and CONTACT US. Below this, there is a section for the CURRENT ISSUE (September 2007) with a 'PDF' button and a 'Quick Search' box. The main content area features a large image of the journal cover and a list of articles. On the left side, there is a sidebar with various links and options, including 'Sign in', 'E-mail Alerts FREE', 'PDF Downloads FREE', 'My Articles/ Searches', 'Online Benefits', 'CME Opportunities', 'Residents Journal FREE', 'Subscribe', 'Activate Your Online Access', 'AUTHORS & REVIEWERS', 'LIBRARIES & INSTITUTIONS', 'MEDIA & JOURNALISTS', 'ADVERTISERS', 'REPRINTS & PERMISSIONS', 'ABOUT THE JOURNAL', and 'CONTACT THE JOURNAL'. At the bottom, there is a 'SUBSCRIBE NOW' section with options to 'Subscribe to This Journal' and 'Activate Your Online Access'. The footer contains contact information for American Psychiatric Publishing, Inc. and the American Psychiatric Association.

For more information or if you cannot locate your customer number, please contact APPI Customer Service:  
Call: 1.800.368.5777 or 703.907.7322  
Email: [appi@psych.org](mailto:appi@psych.org)

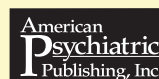

The First and Last Word in Psychiatry

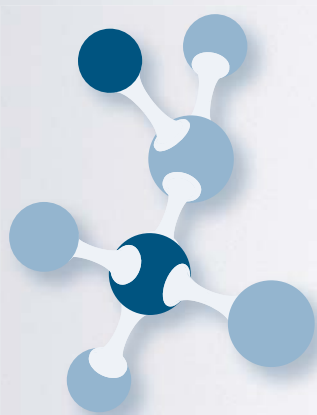

molly

meet

gene

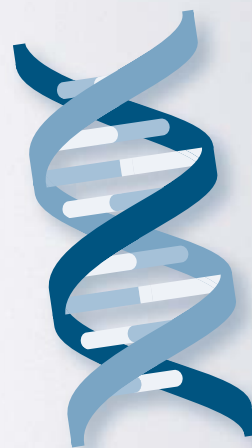

We think they'll be great together. At Vanda, we're using pharmacogenetics to match promising molecules to the right patients. So selecting the right medicine will be easier, thanks to our more personal approach.

To learn more, visit [www.vandapharma.com](http://www.vandapharma.com).

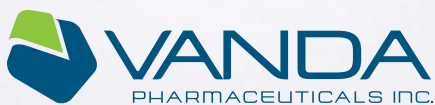

we take medicine personally
