# THE AMERICAN JOURNAL OF PSYCHIATRY

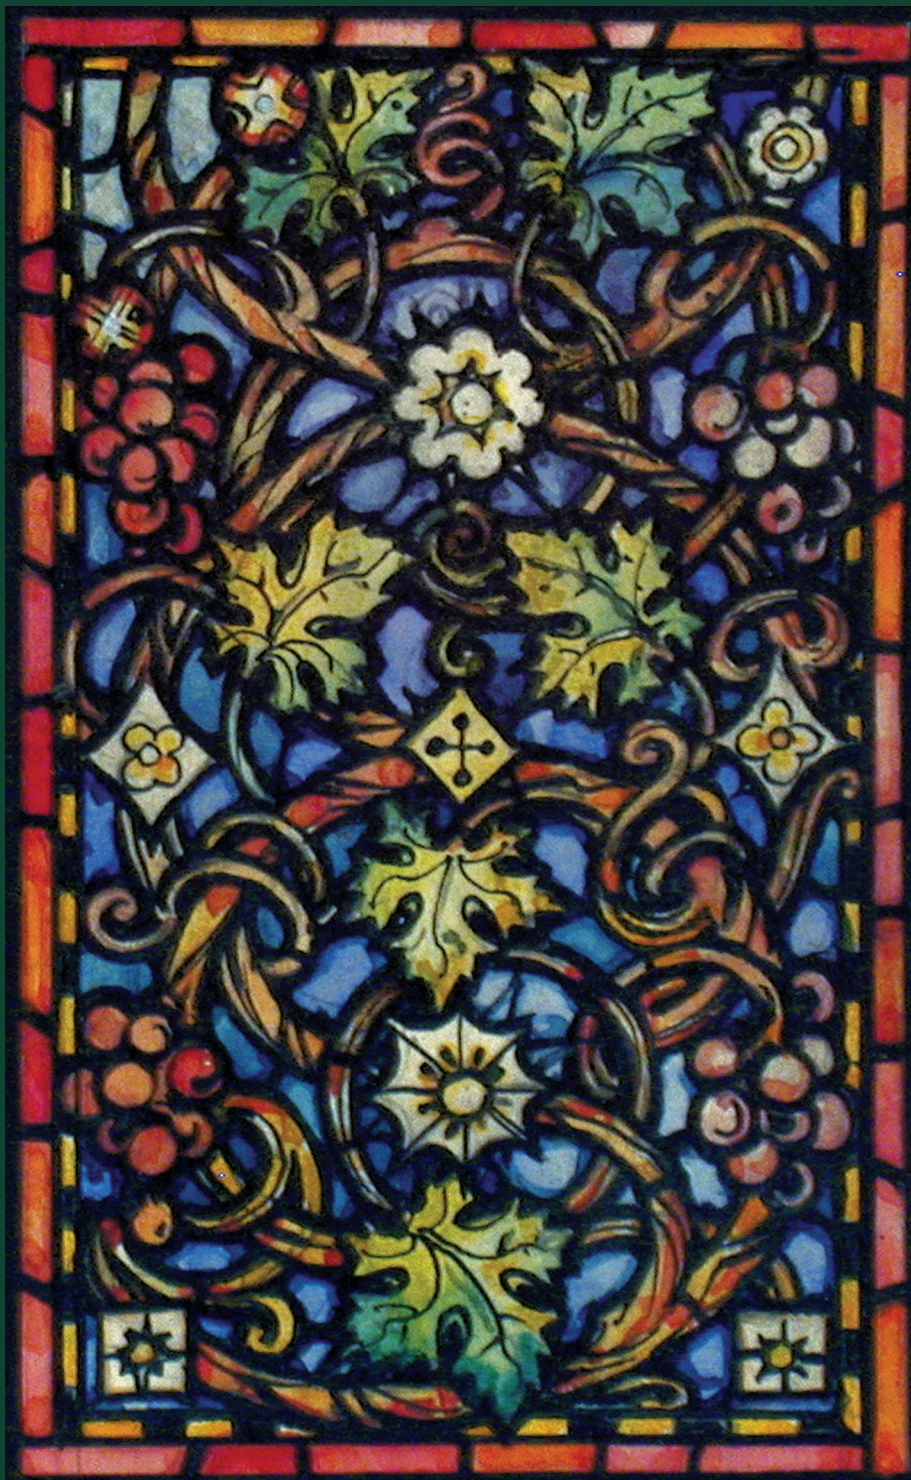

**Anorexia Nervosa**  
Evelyn Attia and B. Timothy Walsh 1805

**Risk of Recurrence in Women  
With Bipolar Disorder During  
Pregnancy: Prospective Study of  
Mood Stabilizer Discontinuation**  
Adele C. Viguera et al. 1817

◀ **Religion, Spirituality, and  
Medicine: Psychiatrists' and  
Other Physicians' Differing  
Observations, Interpretations,  
and Clinical Approaches**  
Farr A. Curlin et al. 1825

**Failure of Frontolimbic Inhibitory  
Function in the Context of  
Negative Emotion in Borderline  
Personality Disorder**  
D. Silbersweig et al. 1832

**Continuing Medical Education** 1922

**December 2007**

**Volume 164 • Number 12**

---

Official Journal of the  
AMERICAN PSYCHIATRIC ASSOCIATION

---

[ajp.psychiatryonline.org](http://ajp.psychiatryonline.org)
