# THE AMERICAN JOURNAL OF PSYCHIATRY

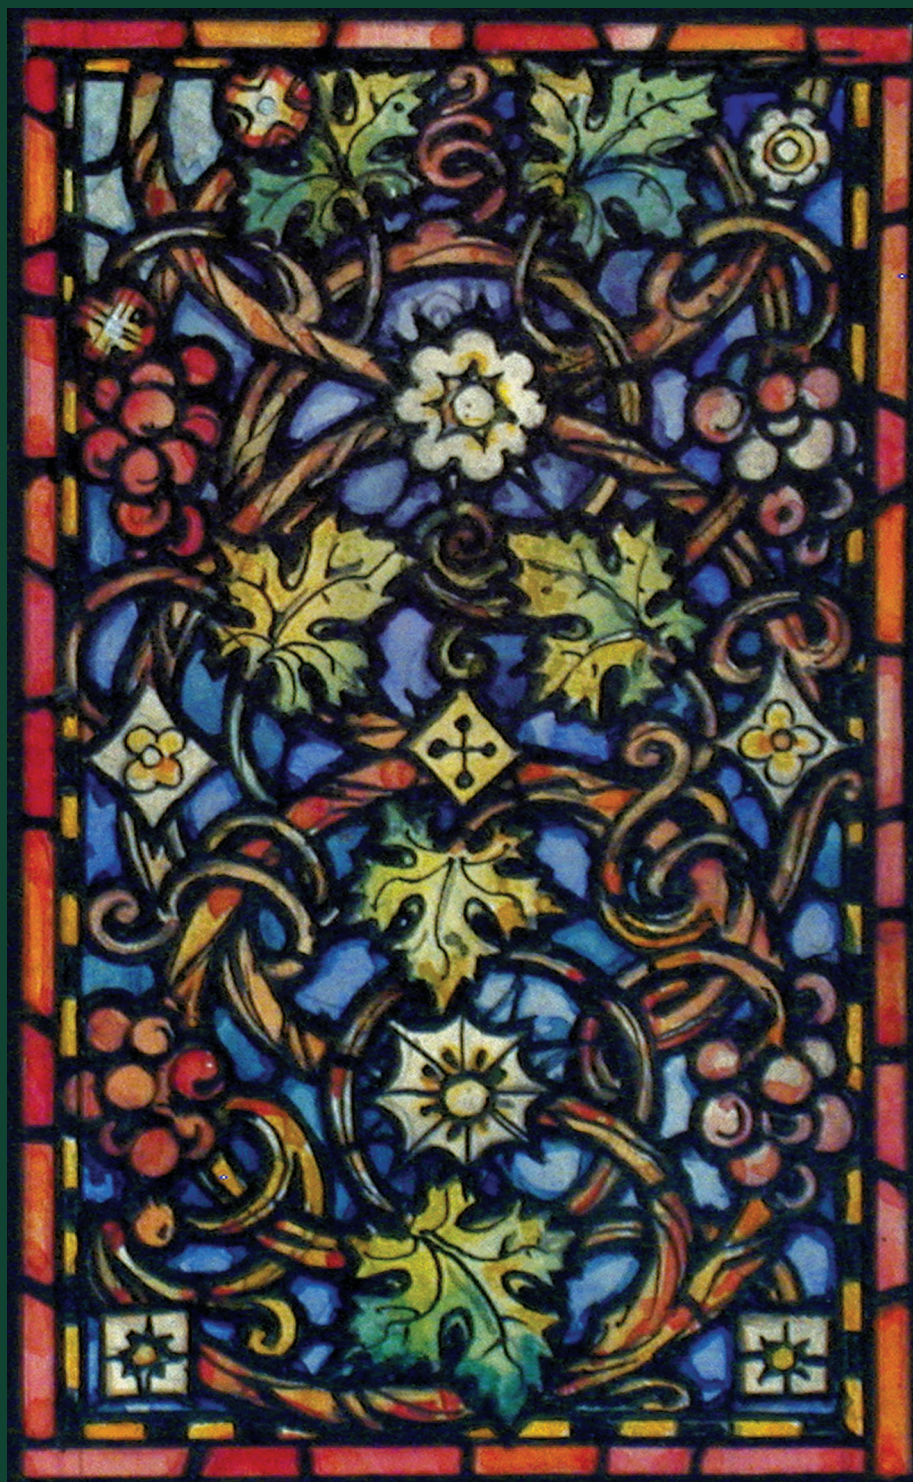

Anorexia Nervosa  
Evelyn Attia and B. Timothy Walsh 1805

Risk of Recurrence in Women  
With Bipolar Disorder During  
Pregnancy: Prospective Study of  
Mood Stabilizer Discontinuation  
Adele C. Viguera et al. 1817

◀ Religion, Spirituality, and  
Medicine: Psychiatrists' and  
Other Physicians' Differing  
Observations, Interpretations,  
and Clinical Approaches  
Farr A. Curlin et al. 1825

Failure of Frontolimbic Inhibitory  
Function in the Context of  
Negative Emotion in Borderline  
Personality Disorder  
D. Silbersweig et al. 1832

Continuing Medical Education 1922

December 2007

Volume 164 • Number 12

Official Journal of the  
AMERICAN PSYCHIATRIC ASSOCIATION

[ajp.psychiatryonline.org](http://ajp.psychiatryonline.org)

# Read *The American Journal of Psychiatry* Online

Activate your FREE online access—It's as easy as 1, 2, 3!

To begin activation, go to [ajp.psychiatryonline.org](http://ajp.psychiatryonline.org) and click **SUBSCRIBE**

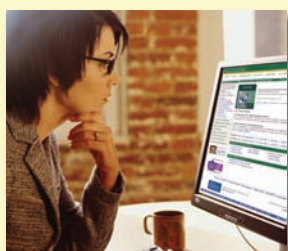

For APA Members and Other Individuals:

1. Click on **ACTIVATE Your Member or Individual (Non-Member) Subscription**
2. Locate your 10-digit Member/Customer Number\* on your journal mailing label above your name. Be sure to enter all 10 digits, including any leading zeros.
3. Enter your number in the box and click **SUBMIT**.

On the next screen, you'll register your subscription and create a username and password that can be used immediately to access your online subscription.

\*If you are an APA Member, in most cases the number on your label will be your Member Number; if it is not, please enter your APA Member Number (with enough leading zeros to create 10 digits) instead of the number on your mailing label.

For Institutions:

1. Click on **ACTIVATE Your Institutional Subscription**.
2. Locate your Customer Number on the journal mailing label above your name. Be sure to enter all 10-digits.
3. Enter your number in the box and click **SUBMIT**. On the next screen, you'll have the opportunity to enter IP addresses for your institution to provide seamless access for your patrons.

Member/Customer Number

AJP 3000056866 CAR-RT LOT88 C-015  
John Q. Sample  
Mental Health Professional  
1000 Wilson Blvd STE 1825  
Arlington VA 22209-3924 01654

## Benefits of Online Activation

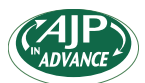

**AJP in Advance**—key research articles posted on the AJP website well in advance of their appearance in print.

**Back issue access to Volume 1, Issue 1**, starting with the *American Journal of Insanity* in 1844. (Available to institutions as a separate one-time purchase.)

**AJP CME**—interactive quizzes that offer *AMA PRA Category 1 Credits*™ for selected articles from each issue (with paid subscription to the CME Course Program).

**AJP Audio**—MP3-format program summarizing findings from key articles from each issue.

**Residents' Journal**—the gateway to AJP articles and features that have most value to residents in their training.

**Precise and powerful searching** by author, keyword, and/or citation details—within any one journal, across the entire PsychiatryOnline journal collection, or across all HighWire journals.

**PubMed, CrossRef, and Google Scholar links**—from cited references to abstracts and full text; to similar articles; to other articles by the same lead authors.

**eTOCs**—Get advance email alerts with the table of contents from the latest issue.

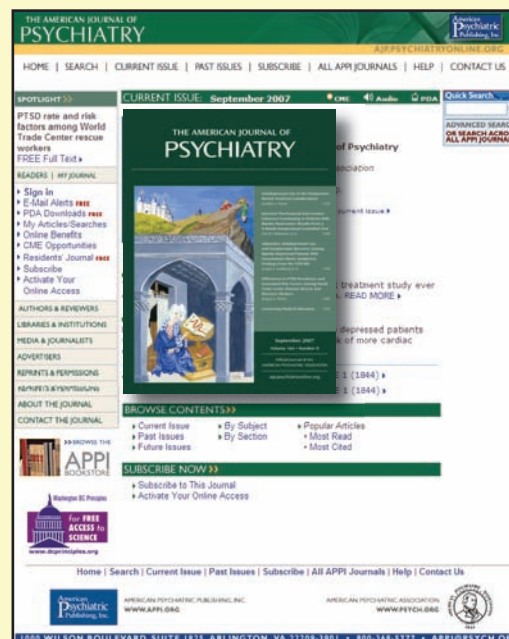

For more information or if you cannot locate your customer number, please contact APPI Customer Service:  
Call: 1.800.368.5777 or 703.907.7322  
Email: [appi@psych.org](mailto:appi@psych.org)

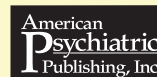

The First and Last Word in Psychiatry

AH762

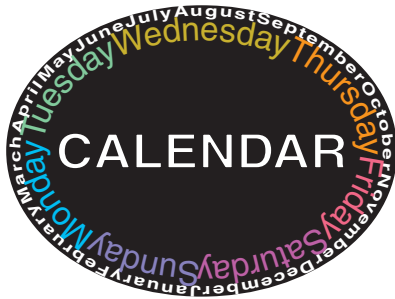

For free listing of your organization's official annual or regional meeting, please send us the following information: sponsor, location, inclusive dates, type and number of continuing education credits (if available), and the name, address, and telephone number of the person or group to contact for more information. In order for an event to appear in our listing, all notices and changes must be received at least 6 months in advance of the meeting and should be addressed to:

*Calendar, American Journal of Psychiatry, 1000 Wilson Boulevard, Suite 1825, Arlington, VA 22209-3901, jblair@psych.org (e-mail).*

*Because of space limitations, only listings of meetings of the greatest interest to Journal readers will be included.*

## DECEMBER

**December 8,** 4th annual Child Mental Health Symposium, Tucson, AZ. Contact: Professional Development Office, University of Arizona College of Medicine, Department of Psychiatry, PO Box 245002, 1501 N. Campbell Ave. #7423, Tucson, AZ 85724-5002; (520) 626-1392 (tel), (520) 626-5732 (fax), uapsycon@email.arizona.edu (e-mail), www.psychiatry.arizona.edu (web site).

**December 8,** The Winter Meeting of the American Academy of Psychoanalysis and Dynamic Psychiatry, Tempe, AZ. Contact: Executive Office, American Academy of Psychoanalysis and Dynamic Psychiatry, PO Box 30, Bloomfield, CT 06002; (888) 691-8281 (tel), (860) 286-0787 (fax), info@aapdp.org (e-mail), www.aapdp.org (web site).

## FEBRUARY 2008

**February 27–March 2,** Annual meeting of the American College of Psychiatrists, Kauai, Hawaii. Contact: American College of Psychiatrists, 122 S. Michigan Ave., Ste. 1360, Chicago, IL 60603; (312) 662-1020 (tel), (312) 662-1025 (fax), maureen@acpsych.org (e-mail).

## MARCH

**March 1–4,** 19th Annual Meeting of the American Neuropsychiatric Association, Savannah, GA. Contact: ANPA Office; (614) 447-2077 (tel), (614) 263-4366 (fax), anpa@osu.edu (e-mail), www.anpaonline.org (web site).

**March 14–17,** 21st Annual Meeting of the American Association for Geriatric Psychiatry, Orlando. Contact: AAGP, 7910 Woodmont Ave., Ste. 1050, Bethesda, MD 20814-3004; (301) 654-7850 (tel), (301)

654-4137 (fax), www.aagpmeeting.org (web site).

**March 15,** 7th Annual Women's Mental Health Symposium, Tucson, AZ. Contact: Professional Development Office, University of Arizona College of Medicine, Department of Psychiatry, PO Box 245002, 1501 N. Campbell Ave. #7423, Tucson, AZ 85724-5002; (520) 626-1392 (tel), (520) 626-5732 (fax), uapsycon@email.arizona.edu (e-mail), www.psychiatry.arizona.edu (web site).

**March 26–29,** Annual Meeting and Scientific Sessions of the Society of Behavioral Medicine, San Diego. Contact: Society of Behavioral Medicine, 17000 Commerce Parkway, Ste. C, Mount Laurel, NJ 08054; (856) 439-1297 (tel), (856) 439-0525 (fax), info@sbm.org (e-mail).

## APRIL

**April 4–5,** The Seventh Annual Pharmacogenetics in Psychiatry Meeting, New York, NY. Contact: Patricia Raikos, The Zucker Hillside Hospital, 75-59 263rd Street, Glen Oaks, NY 11004; (718) 470-8418 (tel), (718) 343-1659 (fax), praikos@nshs.edu (e-mail), www.pharmacogeneticsinpsychiatry.com (web site).

**April 5–9,** 16th European Congress of Psychiatry, Nice, France. Contact: Congress Secretariat, Kenes International, 17 Rue du Cendrier, PO Box 1726, CH-1211 Geneva 1, Switzerland; (41) 22 908 0488 (tel), (41) 22 732 2850 (fax), aep@kenes.com (e-mail).

## MAY

**May 1–4,** The 52nd Annual Meeting of the American Academy of Psychoanalysis and Dynamic Psychiatry, Washington, DC. Contact: Executive Office, American Academy of Psychoanalysis and Dynamic Psychiatry, P. O. Box 30, Bloom-

field, CT 06002; (888) 691-8281 (tel), (860) 286-0787 (fax), info@aapdp.org (e-mail) www.aapdp.org (web site).

**May 3–4,** American Academy of Psychiatry and the Law Semiannual Meeting, Washington, D.C. Contact: One Regency Drive, PO Box 30, Bloomfield, CT 06002-0030; (800) 331-1389, (tel) (860) 286-0787 (fax), execoff@aapl.org (e-mail).

**May 3–8,** 161st Annual Meeting of the American Psychiatric Association, Washington, DC. Contact: Cathy Nash, APA Annual Meetings Dept., 1000 Wilson Blvd., Ste. 1825, Arlington, VA 22209; (703) 907-7822.

**May 11–14,** World Psychiatric Association Epidemiology & Public Health Section Meeting, Saskatoon, Saskatchewan. Contact: Karen E. Mosier, Saskatchewan Health Organization for Research and Evaluation (SHORE), Department of Psychiatry, Ellis Hall, Room 110; (306) 966-1840 (tel), (306) 966-8761 (fax), karen.mosier@usask.ca (e-mail), http://www.medicine.usask.ca/psychiatry/wpa2008/.

**May 29–31,** International Congress of Dual Pathology 2008, Madrid. Contact: Technical Secretariat, Tlesa OPC, Londres, 17 - 28028, Madrid, Spain; (34) 91 361 12600 (tel), (34) 91 355 9208, secretariat@cipd2008.com (e-mail), www.cipd2008.com (web site).

## JUNE

**June 19–21,** Thematic Conference on Depression and Relevant Psychiatric Condition in Primary Care, Granada, Spain. Contact: Francisco Torres-González, Andalusian Research Group on Mental Health, University of Granada, Avenida de Madrid 11, Granada 18071, Spain; (34) 958-272651 (tel), (34) 958-275214 (fax), ftorres@ugr.es (e-mail).

*Continued on page A34*

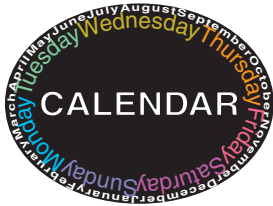

Continued from page A16

---

## OCTOBER

---

**October 2–5**, 60th Institute on Psychiatric Services, American Psychiatric Association, Chicago, IL. Contact: Jill Gruber, APA Annual Meetings Dept., 1000 Wilson Blvd., Ste. 1825, Arlington, VA 22209; (703) 907-7815.

**October 28–November 2**, 55th Annual Meeting of the American Academy of Child and Adolescent Psychiatry, Chicago. Contact: AACAP, 3615 Wisconsin Avenue, N.W., Washington, DC 20016-3007; (202) 966-7300 (tel), (202) 966-2891 (fax), meetings@aacap.org (e-mail), www.aacap.org (web site).

---

## NOVEMBER

---

**November 23–28**, Canadian Psychiatric Association 58th Annual Meeting, Vancouver, British Columbia, Canada. Contact: 260-441 MacLaren Street, Ottawa, ON K2P 2H3, Canada; (800) 267-1555 (tel), (613) 234-9857 (fax), cpa@medical.org (e-mail).

---

## FEBRUARY 2009

---

**February 25–March 1**, American College of Psychiatrists Annual Meeting, Tucson, AZ. Contact: 122 South Michigan Avenue, Suite 1360, Chicago, IL 60603; (312) 662-1020 (tel), (312) 662-1025 (fax), angel@ACPsych.org (e-mail).

---

## MAY

---

**May 16–21**, 162nd Annual Meeting of the American Psychiatric Association, San Francisco. Contact: Cathy Nash, APA Annual Meetings Dept., 1000 Wilson Blvd., Ste. 1825, Arlington, VA 22209; (703) 907-7822.

## Coming in the January 2008 issue

### THE AMERICAN JOURNAL OF PSYCHIATRY

*Disruption of Existing Mental Health Treatments and Failure to Initiate New Treatments After Hurricane Katrina*

P.S. Wang, M. Gruber, R. Powers, M. Schoenbaum, A. Speier, K. Wells, and R. Kessler

*Frequency of Provider Contact After FDA Advisory on Risk of Pediatric Suicidality With SSRIs*

E. Morrato, A. Libby, H. Orton, F. deGruy III, D. Brent, R. Allen, and R. Valuck,

*Efficacy of Sibutramine for the Treatment of Binge Eating Disorder: A Randomized Multicenter Placebo-Controlled Double-Blind Study*

D. Wilfley, S. Crow, J. Hudson, J. Mitchell, R. Berkowitz, V. Blakesley, B.T. Walsh, and The Sibutramine Study Group

*Infections in CNS During Childhood and the Risk of Subsequent Psychotic Illness: A Cohort Study of More Than One Million Swedish Subjects*

C. Dalman, P. Allebeck, D. Gunnell, G. Harrison, K. Kristensson, G. Lewis, S. Lofving, F. Rasmussen, S. Wicks, and H. Karlsson

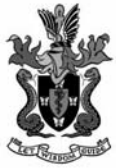

# THE BRITISH JOURNAL OF PSYCHIATRY

November 2007, VOL. 191

<http://bjp.rcpsych.org>

A16 Editorial Board

A17 Highlights of this issue

A18 Psychiatry in pictures

## EDITORIALS

373 Does compulsory or supervised community treatment reduce 'revolving door' care? Legislation is inconsistent with recent evidence  
S. Kisely and L.A. Campbell

375 The medical model is dead—long live the medical model  
P. Shah and D. Mountain

## REVIEW ARTICLES

378 Effects of treating postnatal depression on mother—infant interaction and child development. Systematic review  
A.S. Poobalan, L.S. Aucott, L. Ross, W.C.S. Smith, P.J. Helms, and J.H.G. Williams

387 Cortisol and post-traumatic stress disorder in adults. Systematic review and meta-analysis  
M.-L. Meewisse, J.B. Reitsma, G.-J. de Vries, B.P.R. Gersons, and M. Olff

## PAPERS

393 Prevalence of depressive symptoms and syndromes in later life in ten European countries. The SHARE study  
E. Castro-Costa, M. Dewey, R. Stewart, S. Banerjee, F. Huppert, C. Mendonca-Lima, C. Bula, F. Reisches, J. Wancata, K. Ritchie, M. Tsolaki, R. Mateos, and M. Prince

402 Genotype effects of *CHRNA7*, *CNR1* and *COMT* in schizophrenia: interactions with tobacco and cannabis use

S. Zammit, G. Spurlock, H. Williams, N. Norton, N. Williams, M.C. O'Donovan, and M.J. Owen

408 Psychophysiological and behavioural characteristics of individuals comorbid for antisocial personality disorder and schizophrenia-spectrum personality disorder  
R.A. Schug, A. Raine, and R.W. Wilcox

415 Impact and clinical significance of a preventive intervention for disruptive boys. 15-year follow-up  
R. Boisjoli, F. Vitaro, É. Lacourse, E.D. Barker, and R.E. Tremblay

420 Structured patient—clinician communication and 1-year outcome in community mental healthcare. Cluster randomised controlled trial  
S. Priebe, R. McCabe, J. Bullenkamp, L. Hansson, C. Lauber, R. Martinez-Leal, W. Rössler, H. Salize, B. Svensson, F. Torres-Gonzales, R. van den Brink, D. Wiersma and D.J. Wright

427 Clinical effectiveness of treatments for anorexia nervosa in adolescents. Randomised controlled trial  
S.G. Gowers, A. Clark, C. Roberts, A. Griffiths, V. Edwards, C. Bryan, N. Smethurst, S. Byford, and B. Barrett

436 Economic evaluation of a randomised controlled trial for anorexia nervosa in adolescents  
S. Byford, B. Barrett, C. Roberts, A. Clark, V. Edwards, N. Smethurst, and S.G. Gowers

441 Antidepressant effects of augmentative transcranial magnetic stimulation. Randomised multicentre trial  
U. Herwig, A.J. Fallgatter, J. Höppner, G.W. Eschweiler, M. Kron, G. Hajak, F. Padberg, A. Naderi-Heiden, B. Abler, P. Eichhammer, N. Grossheinrich, B. Hay, T. Kammer, B. Langguth, C. Laske, C. Plewnia, M.M. Richter, M. Schulz, S. Unterecker, A. Zinke, M. Spitzer, and C. Schönfeldt-Lecuona

## SHORT REPORTS

449 Intergenerational transmission of health beliefs in somatoform disorders. Exploratory study  
T. Marshall, D.P.H. Jones, P.G. Ramchandani, A. Stein, and C. Bass

451 Effects of training community staff in interventions for substance misuse in dual diagnosis patients with psychosis (COMO study). Cluster randomised trial  
S. Johnson, G. Thornicroft, S. Afuwape, M. Leese, I.R. White, E. Hughes, S. Wanigaratne, H. Miles, and T. Craig

453 Are people with schizophrenia more logical than healthy volunteers?  
G.S. Owen, J. Cutting, and A.S. David

## COLUMNS

455 Correspondence

460 One hundred years ago

462 Book reviews

468 Contents of the *American Journal of Psychiatry*

469 Contents of *Advances in Psychiatric Treatment*

470 From the Editor's desk

# Psychological Medicine

Volume 37 Number 11 November 2007

## CONTENTS

|                                                                                                                                                                                                                                                                                                      |      |                                                                                                                                                                                                                                                              |      |
|------------------------------------------------------------------------------------------------------------------------------------------------------------------------------------------------------------------------------------------------------------------------------------------------------|------|--------------------------------------------------------------------------------------------------------------------------------------------------------------------------------------------------------------------------------------------------------------|------|
| <b>In this Issue</b>                                                                                                                                                                                                                                                                                 | 1519 | <b>Differentiation of executive and attention impairments in affective illness</b> STODDART, S.D.R., CRADDOCK, N.J., AND JONES, L.A.                                                                                                                         | 1613 |
| <b>EDITORIAL REVIEW</b>                                                                                                                                                                                                                                                                              |      | <b>Genetic and environmental factors affecting self-esteem from age 14 to 17: a longitudinal study of Finnish twins</b> RAEVUORI, A., DICK, D.M., KESKI-RAHKONEN, A., PULKKINEN, L., ROSE, R.J., RISSANEN, A., KAPRIO, J., VIKEN, R.J., AND SILVENTOINEN, K. | 1625 |
| <b>Personality diatheses: a superior explanation than disorder</b> TYRER, P.                                                                                                                                                                                                                         | 1521 | <b>Genetic and environmental influences on obsessive-compulsive symptoms in adults: a population-based twin-family study</b> VAN GROOTHEEST, D., CATH, D.C., BEEKMAN, A.T., AND BOOMSMA, D.I.                                                                | 1635 |
| <b>INVITED REVIEW</b>                                                                                                                                                                                                                                                                                |      | <b>Repetitive transcranial magnetic stimulation for the treatment of obsessive compulsive disorder: a double-blind controlled investigation</b> SACHDEV, P.S., LOO, C.K., MITCHELL, P.B., MCFARQUHAR, T.F., AND MALHI, G.S.                                  | 1645 |
| <b>The gradual emergence of sex differences in aggression: alternative hypotheses</b> HAY, D.F.                                                                                                                                                                                                      | 1527 | <b>COMT Val<sup>158</sup>Met moderation of stress-induced psychosis</b> STEFANIS, N.C., HENQUET, C., AVRAMOPOULOS, D., SMYRNI, N., EVDOKIMIDIS, I., MYIN-GERMEYS, I., STEFANIS, C.N., AND VAN OS, J.                                                         | 1651 |
| <b>ORIGINAL ARTICLES</b>                                                                                                                                                                                                                                                                             |      | <b>Physical activity and prevalence and incidence of mental disorders in adolescents and young adults</b> STRÖHLE, A., HÖFLER, M., PFISTER, H., MÜLLER, A.-G., HOYER, J., WITTCHEN, H.-U., AND LIEB, R.                                                      | 1657 |
| <b>Actuarial prediction of violent recidivism in mentally disordered offenders</b> SNOWDEN, R.J., GRAY, N.S., TAYLOR, J., AND MACCULLOCH, M.J.                                                                                                                                                       | 1539 | <b>BOOK REVIEWS</b>                                                                                                                                                                                                                                          |      |
| <b>Identifying correlates of suicide attempts in suicidal ideators: a population-based study</b> BREZO, J., PARIS, J., TREMBLAY, R., VITARO, E., HÉBERT, M., AND TURECKI, G.                                                                                                                         | 1551 | <i>Reconceiving Schizophrenia</i> OWEN, G.                                                                                                                                                                                                                   | 1667 |
| <b>Natural history of suicidal behaviors in a population-based sample of young adults</b> BREZO, J., PARIS, J., BARKER, E.D., TREMBLAY, R., VITARO, E., ZOCOLILLO, M., HÉBERT, M., AND TURECKI, G.                                                                                                   | 1563 | <i>Cultivating a Thinking Surgeon: New Perspectives on Clinical Teaching, Learning and Assessment</i> SPOTO, G.                                                                                                                                              | 1668 |
| <b>Life trajectories and burden of adversity: mapping the developmental profiles of suicide mortality</b> SÉGUIN, M., LESAGE, A., TURECKI, G., BOUCHARD, M., CHAWKY, N., TREMBLAY, N., DAIGLE, F., AND GUY, A.                                                                                       | 1575 | <i>Mentalization-based Treatment for Borderline Personality Disorder: A Practical Guide</i> BELLHOUSE, J.                                                                                                                                                    | 1669 |
| <b>Evaluating suicide-related adverse events in clinical trials of fluoxetine treatment in adults for indications other than major depressive disorder</b> TAUSCHER-WISNIEWSKI, S., DISCH, D., PLEWES, J., BALL, S., AND BEASLEY JR., C.M.                                                           | 1585 | <i>Psychiatry</i> HARDING, K.                                                                                                                                                                                                                                | 1670 |
| <b>Clinical and prognostic implications of seasonal pattern in bipolar disorder: a 10-year follow-up of 302 patients</b> GOIKOLEA, J.M., COLOM, F., MARTÍNEZ-ARÁN, A., SÁNCHEZ-MORENO, J., GIORDANO, A., BULBENA, A., AND VIETA, E.                                                                  | 1595 | <i>Religion, Culture and Mental Health</i> BLAZER, D.                                                                                                                                                                                                        | 1671 |
| <b>Attitudes towards childbearing, causal attributions for bipolar disorder and psychological distress: a study of families with multiple cases of bipolar disorder</b> MEISER, B., MITCHELL, P.B., KASPARIAN, N.A., STRONG, K., SIMPSON, J. M., MIRESKANDARI, S., TABASSUM, L., AND SCHOFIELD, P.R. | 1601 | <b>Correspondence</b>                                                                                                                                                                                                                                        | 1673 |
|                                                                                                                                                                                                                                                                                                      |      | <i>American Journal of Psychiatry</i> Contents July 2007                                                                                                                                                                                                     | 1677 |
